# Supplementary material for: P-Alkynyl functionalized benzazaphospholes as transmetalating agents
Source: Royal Society of Chemistry journal article supplement (doi:10.1039/d0dt01367f), 2020-12-17
Supplement: d0dt01367f1.pdf [file d0dt01367f1.pdf]

Supporting Information for

## **P-Alkynyl Functionalized Benzazaphospholes as Transmetalating Agents**

Daniel Y. Zhou,<sup>†</sup> Preston M. Miura-Akagi,<sup>†</sup> Sierra M. McCarty,<sup>†</sup> Celeste H. Guiles,<sup>†</sup>  
Timothy J. O'Donnell,<sup>†</sup> Wesley Y. Yoshida,<sup>†</sup> Colleen E. Krause,<sup>‡</sup>  
Arnold L. Rheingold,<sup>£</sup> Russell P. Hughes,<sup>^</sup> and Matthew F. Cain<sup>\*,†</sup>

<sup>†</sup> Department of Chemistry, University of Hawai'i at Mānoa, 2545 McCarthy Mall, Honolulu, Hawaii 96822, United States

<sup>‡</sup> Department of Chemistry, University of Hartford, 200 Bloomfield Avenue, West Hartford, Connecticut, 06117, United States

<sup>£</sup> Department of Chemistry, University of California, San Diego, 9500 Gilman Drive, La Jolla, California 92093, United States

<sup>^</sup> 6128 Burke Laboratory, Department of Chemistry, Dartmouth College, Hanover, New Hampshire 03755, United States

1. Experimentals and NMR spectra for new compounds (page S1-S27)
2. Stoichiometric and Catalytic Studies (S28-S69)
3. DFT and NBO Results for Azaphospholanes (S70-S71)
4. Electrochemistry Experimental Details including all Cyclic Voltammetry Plots (S72 – S79)
5. Experimental Details for Crystal Structure Refinement and Acquisition (S80 – S147)

## 1. Experimentals and NMR Spectra for New Compounds:

**General Experimental Details.** Unless otherwise specified, all reactions and manipulations were performed under a nitrogen atmosphere in a MBraun glovebox or using standard Schlenk techniques. All glassware was oven-dried overnight (at minimum) at 140 °C prior to use. Anhydrous solvents were purchased directly from chemical suppliers (Aldrich or Acros), pumped directly into the glove box, and stored over oven-activated 4 or 5 Å molecular sieves (Aldrich). 4N HCl in dioxane, TMS-I, BrMgCCPh, Na<sub>2</sub>PdCl<sub>4</sub>, P(*t*-Bu)<sub>2</sub>Cy, P(*t*-Bu)Cy<sub>2</sub>, PCy<sub>3</sub>, CuI, and anhydrous NH(*i*-Pr)<sub>2</sub> were purchased from commercial suppliers. Benzazaphosphole **1** and Pd(II) complexes **C** and **D** were prepared by the published methods referenced in the manuscript. NMR spectra were obtained on either Varian spectrometers operating at 300, 400, or 500 MHz; all spectra are displayed in the Supporting Information. NMR chemical shifts are reported as ppm relative to tetramethylsilane and are referenced to the residual proton or <sup>13</sup>C signal of the solvent (<sup>1</sup>H CDCl<sub>3</sub>, 7.27 ppm; <sup>1</sup>H C<sub>6</sub>D<sub>6</sub>, 7.16 ppm; <sup>13</sup>C CDCl<sub>3</sub> 77.16 ppm; <sup>13</sup>C C<sub>6</sub>D<sub>6</sub>, 128.06 ppm).

### IMPORTANT NOTE

Some of the NMR spectra shown below feature an artifact with the following chemical shifts:

<sup>1</sup>H NMR spectroscopy: 5 ppm  
<sup>13</sup>C{<sup>1</sup>H} NMR spectroscopy: 110 ppm

The artifact is most likely the result of intermittent problems with the spectrometer's reference generator board. Currently, due to budget problems at the University of Hawaii, repairs to address this problem have been delayed, and the COVID-19 outbreak has further complicated the situation.

## Synthesis of 2

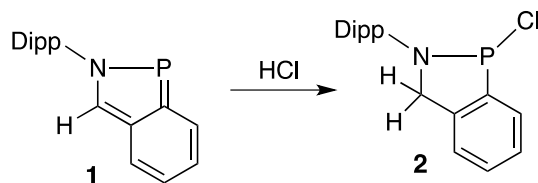

Compound **1** (100 mg, 0.339 mmol) was dissolved in 3 mL of toluene in a Schlenk bomb in the glovebox. The solution was taken out of the glovebox and 4N HCl in dioxane (169  $\mu$ L, 0.678 mmol, 2 equiv.) was injected via syringe under positive N<sub>2</sub> pressure and stirred for 15 min. The reaction mixture was concentrated under vacuum, and the residual yellow solid was recrystallized from 10 mL of a 1:1 mixture of CHCl<sub>3</sub> and MeCN at -35 °C to give a white solid **2** (70 mg, 0.211 mmol, 63%). Crystals suitable for X-ray diffraction were obtained from this recrystallization.

Anal. Calcd for C<sub>19</sub>H<sub>23</sub>ClNP: C, 68.77; H, 6.99; N, 4.22. Found: C, 68.67; H, 6.98; N, 4.08. <sup>31</sup>P{<sup>1</sup>H} NMR (202 MHz, C<sub>6</sub>D<sub>6</sub>):  $\delta$  141.0. <sup>1</sup>H NMR (500 MHz, C<sub>6</sub>D<sub>6</sub>):  $\delta$  7.64 (m, 1H, Ar), 7.15 (m, 3H, Ar), 7.04 (m, 2H, Ar), 6.89 (m, 1H, Ar), 4.95 (dd, *J* = 18, 6 Hz, 1H, CH<sub>2</sub>), 4.12 (dd, *J* = 18, 6 Hz, 1H, CH<sub>2</sub>), 3.78 (sept, *J* = 6 Hz, 1H, CH), 2.74 (sept, *J* = 6 Hz, 1H, CH), 1.42 (d, *J* = 6 Hz, 3H, Me), 1.19 (d, *J* = 6 Hz, 3H, Me), 1.11 (d, *J* = 6 Hz, 3H, Me), 0.9 (d, *J* = 6 Hz, 3H, Me). <sup>13</sup>C NMR (125 MHz, C<sub>6</sub>D<sub>6</sub>):  $\delta$  149.1 (d, *J* = 4 Hz, Ar), 147.0 (d, *J* = 4 Hz, Ar), 143.9 (Ar), 143.6 (d, *J* = 21 Hz, Ar), 136.8 (d, *J* = 13 Hz, Ar), 130.3 (Ar), 128.5 (Ar), 128.3 (d, *J* = 5 Hz, Ar), 128.1 (d, *J* = 7 Hz, Ar), 124.5 (Ar), 124.2 (Ar), 122.4 (Ar), 64.1 (d, *J* = 16 Hz, CH<sub>2</sub>), 28.5 (CH), 28.4 (CH), 25.17 (Me), 25.13 (Me), 24.9 (d, *J* = 5 Hz, Me), 24.7 (Me).

$^{31}\text{P}\{^1\text{H}\}$  NMR (202 MHz,  $\text{C}_6\text{D}_6$ )

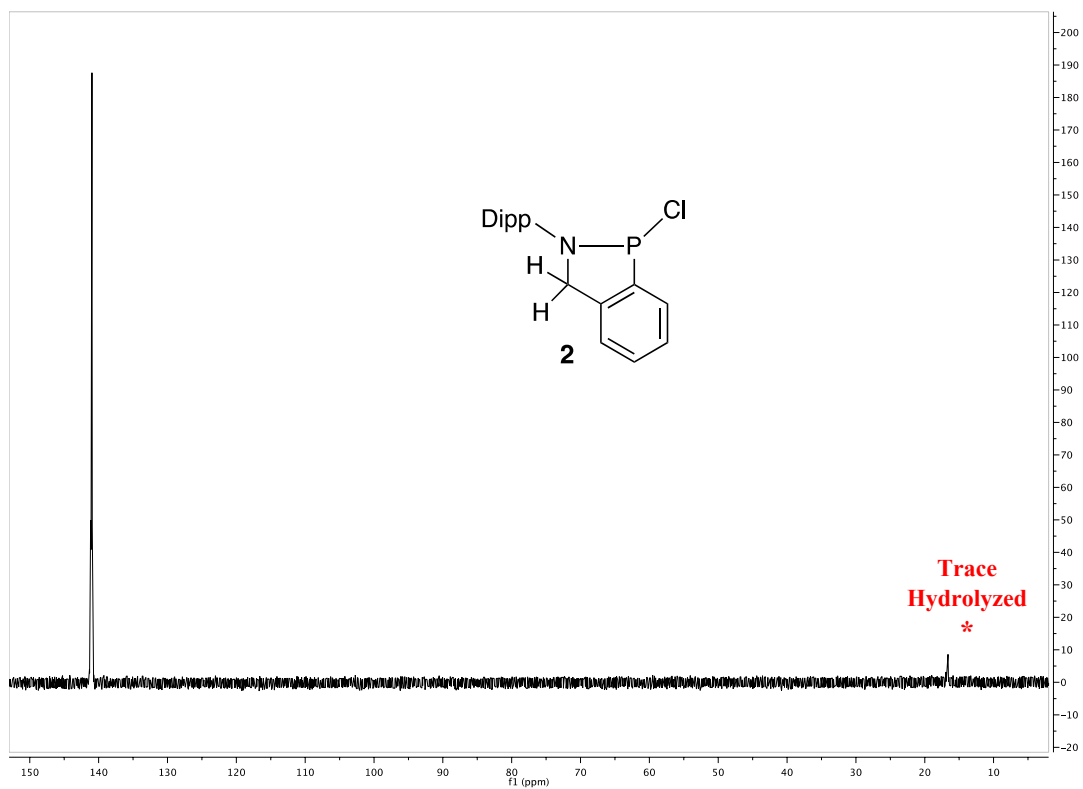

$^1\text{H}$  NMR (500 MHz,  $\text{C}_6\text{D}_6$ )

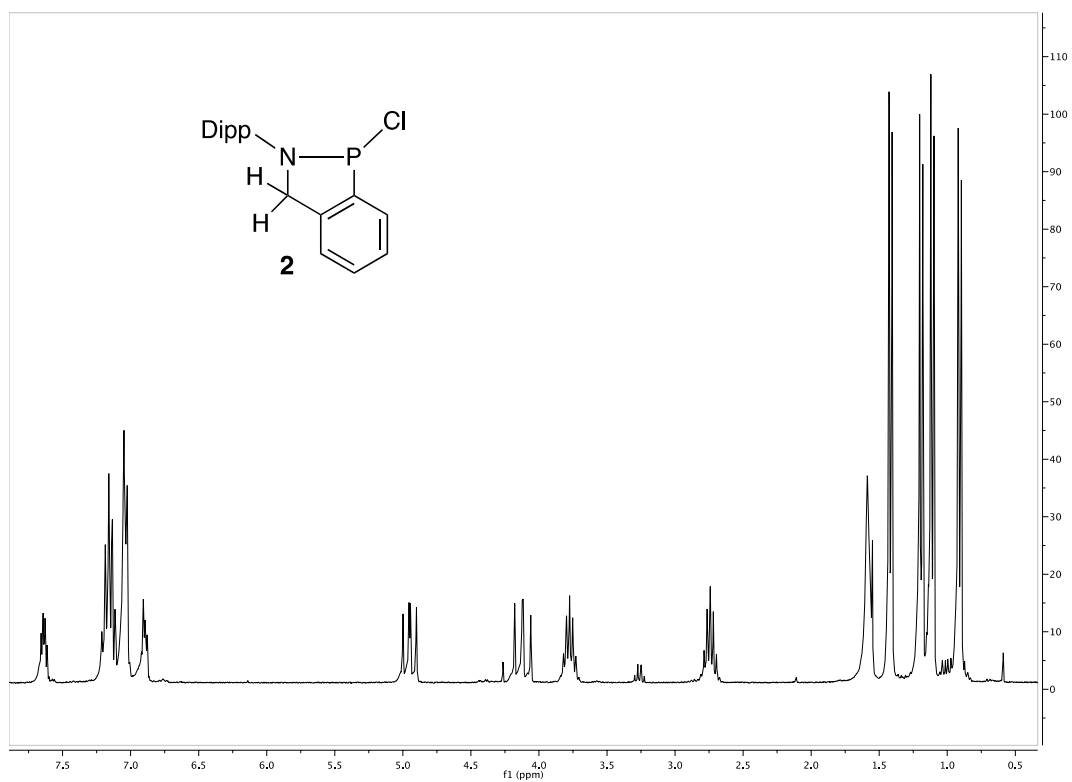

$^{13}\text{C}\{^1\text{H}\}$  NMR (125 MHz,  $\text{CDCl}_3$ )

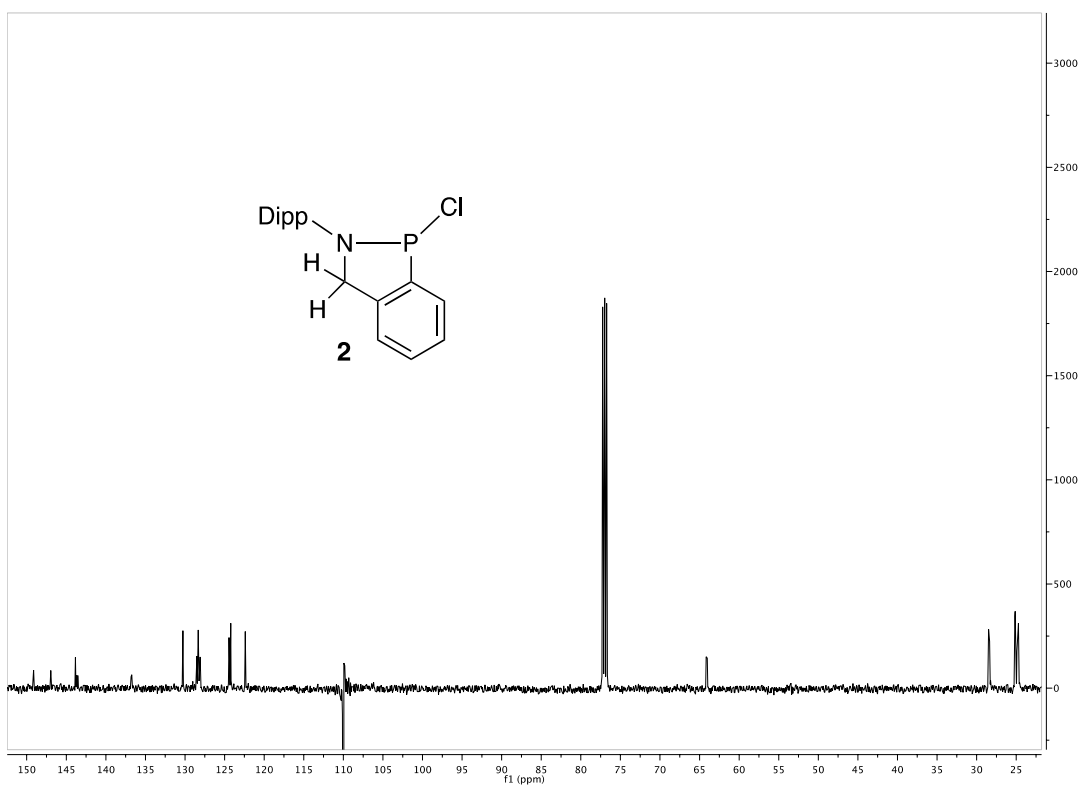

CENTC Elemental Analysis Facility  
University of Rochester  
Rochester, NY 14627 USA  
Email: ealab@chem.rochester.edu

|                       |                                |
|-----------------------|--------------------------------|
| <b>Date of report</b> | 8/10/2018 6:54:44PM            |
| <b>User ID</b>        | Administrator                  |
| <b>Comments</b>       | PMA 343 [ Cain / Miura-Akagi ] |

|             |                      |         |               |
|-------------|----------------------|---------|---------------|
| DATE & TIME | 8/10/2018 6:53:53 PM | P_ID    | EA LAB        |
| SAMPLE ID   | 18410                | USER ID | Administrator |
| WEIGHT (mg) | 2.365                | MODE    | CHN           |

|          |         |
|----------|---------|
| CARBON   | 68.665% |
| HYDROGEN | 6.982%  |
| NITROGEN | 4.078%  |

#### Special Handling

The sample was transferred under argon and was combusted in a tin capsule that was crimp-sealed with a die apparatus.

#### Acknowledgment

Analytical data were obtained from the CENTC Elemental Analysis Facility at the University of Rochester, funded by NSF CHE-0650456.

#### Instrumentation

Microanalysis samples were weighed with a PerkinElmer Model AD6000 Autobalance and their compositions were determined with a PerkinElmer 2400 Series II Analyzer. Air-sensitive samples were handled in a VAC Atmospheres glovebox.

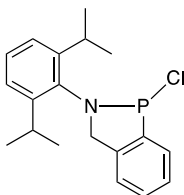

Chemical Formula:  $C_{19}H_{23}ClNP$   
Exact Mass: 331.1257  
Molecular Weight: 331.8238  
Elemental Analysis: C, 68.77; H, 6.99; Cl, 10.68; N, 4.22; P, 9.33

## Synthesis of 3

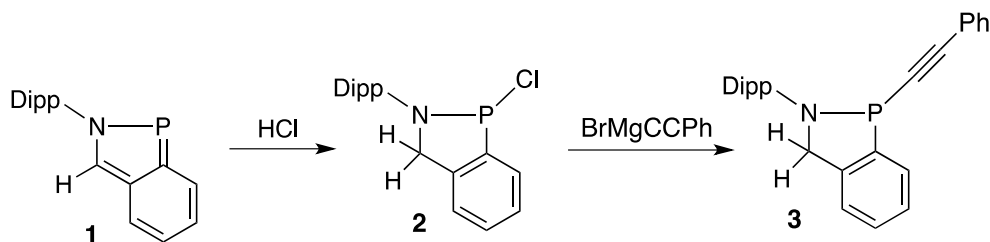

Compound **1** (3.69 g, 12.5 mmol) and a stir bar were loaded in a Schlenk bomb inside the glovebox and dissolved in 10 mL of toluene. The bomb was taken outside the glovebox and HCl (4 N in 1,4-dioxane, 6.25 mL, 25.0 mmol, 2.00 equiv.) was injected through a septum via syringe under positive N<sub>2</sub> pressure. The mixture was stirred at room temperature for 15 min. The bomb was brought back into the glovebox, and the reaction mixture was concentrated under vacuum. The residue was washed with 10 mL of pentane, re-concentrated, and then dissolved in 10 mL of THF. The bomb was taken back outside the glovebox and placed in an ice bath at 0 °C and BrMgCCPh (1.0M in THF, 25.0 mL, 25.0 mmol, 2.00 equiv.) was injected through a septum via syringe under positive N<sub>2</sub> pressure. The reaction mixture was warmed to room temperature overnight and then concentrated under vacuum on the Schlenk line. The residue was brought back inside the glovebox and extracted with pentane and filtered through Celite. The filtrate was concentrated to 50 mL and put in the freezer at -35 °C, resulting in the precipitation of the product as a white crystalline solid (3.07 g, 7.72 mmol, 62%). Redissolving a portion of the crystalline product in pentane, followed by subsequent cooling to -35 °C afforded X-ray quality crystals.

Anal. Calcd. for C<sub>27</sub>H<sub>28</sub>NP: C, 81.58; H, 7.10; N, 3.52. Found: C, 81.09; H, 6.97; N, 3.23. <sup>31</sup>P{<sup>1</sup>H} NMR (160 MHz, C<sub>6</sub>D<sub>6</sub>): δ 34.8. <sup>1</sup>H NMR (500 MHz, CDCl<sub>3</sub>): δ 7.82-7.75 (m, 1H, Ar), 7.49-7.36 (m, 5H, Ar), 7.34-7.26 (m, 4H, Ar), 7.24-7.18 (m, 2H, Ar), 5.12 (d, *J* = 15 Hz, 1H, CH<sub>2</sub>), 4.35 (dd, *J* = 14, 14 Hz, 1H, CH<sub>2</sub>), 3.86 (septet, *J* = 7 Hz, 1H, CH), 2.88 (septet, *J* = 7 Hz, 1H, CH), 1.31 (d, *J* = 7 Hz, 6H, Me), 1.24 (d, *J* = 7 Hz, 3H, Me), 1.12 (d, *J* = 7 Hz, 3H, Me). <sup>13</sup>C{<sup>1</sup>H} NMR (125 MHz, CDCl<sub>3</sub>): δ 150.7 (Ar), 148.1 (Ar), 144.3 (Ar), 139.9 (d, *J* = 16 Hz, Ar), 139.7 (d, *J* = 10 Hz, Ar), 131.6 (Ar), 128.6 (d, *J* = 19 Hz, Ar), 128.2 (Ar), 127.9 (Ar), 127.6 (d, *J* = 7 Hz, Ar), 127.5 (Ar), 127.3 (Ar), 124.2 (Ar), 123.8 (Ar), 122.9 (Ar), 122.4 (Ar), 104.8 (d, *J* = 11 Hz, P-C≡C), 92.0 (d, *J* = 77 Hz, P-C≡C), 62.8 (d, *J* = 11 Hz, CH<sub>2</sub>), 28.8 (CH), 28.4 (CH), 25.4 (Me), 25.1 (Me), 24.7 (Me), 24.6 (Me).

$^{31}\text{P}\{^1\text{H}\}$  NMR (160 MHz,  $\text{C}_6\text{D}_6$ )

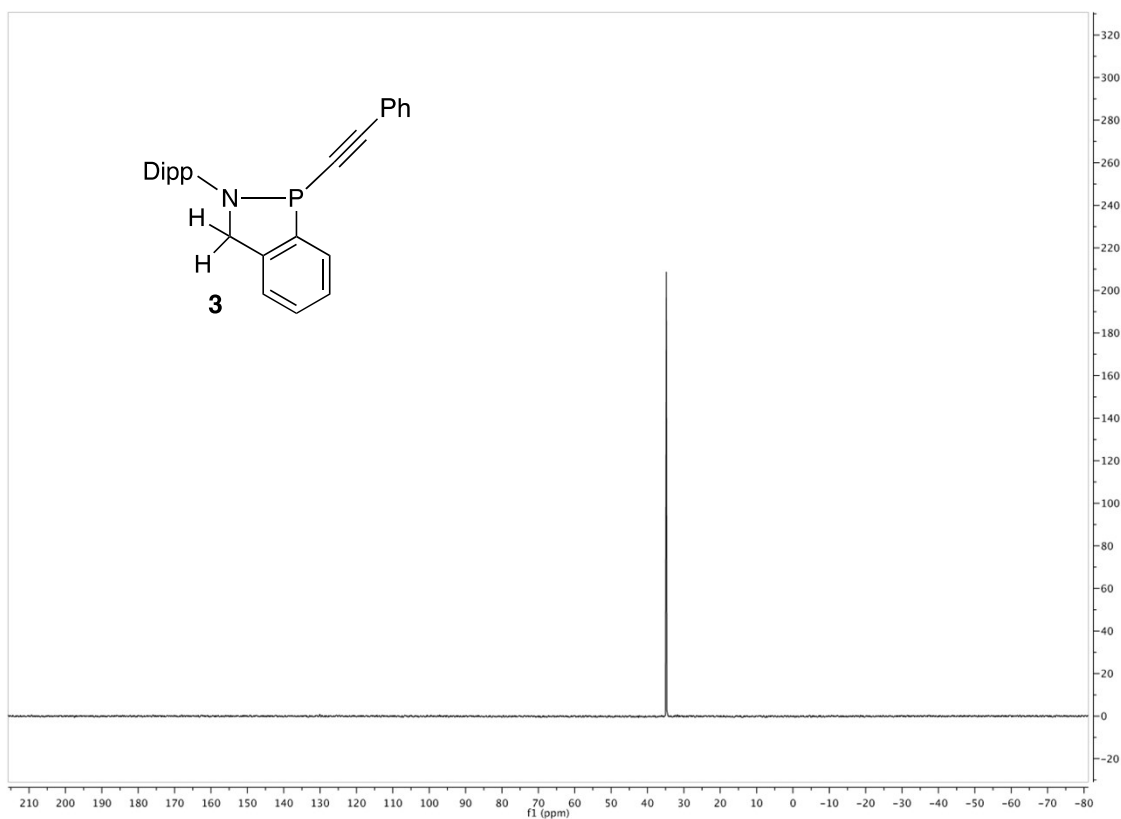

$^1\text{H}$  NMR (500 MHz,  $\text{CDCl}_3$ )

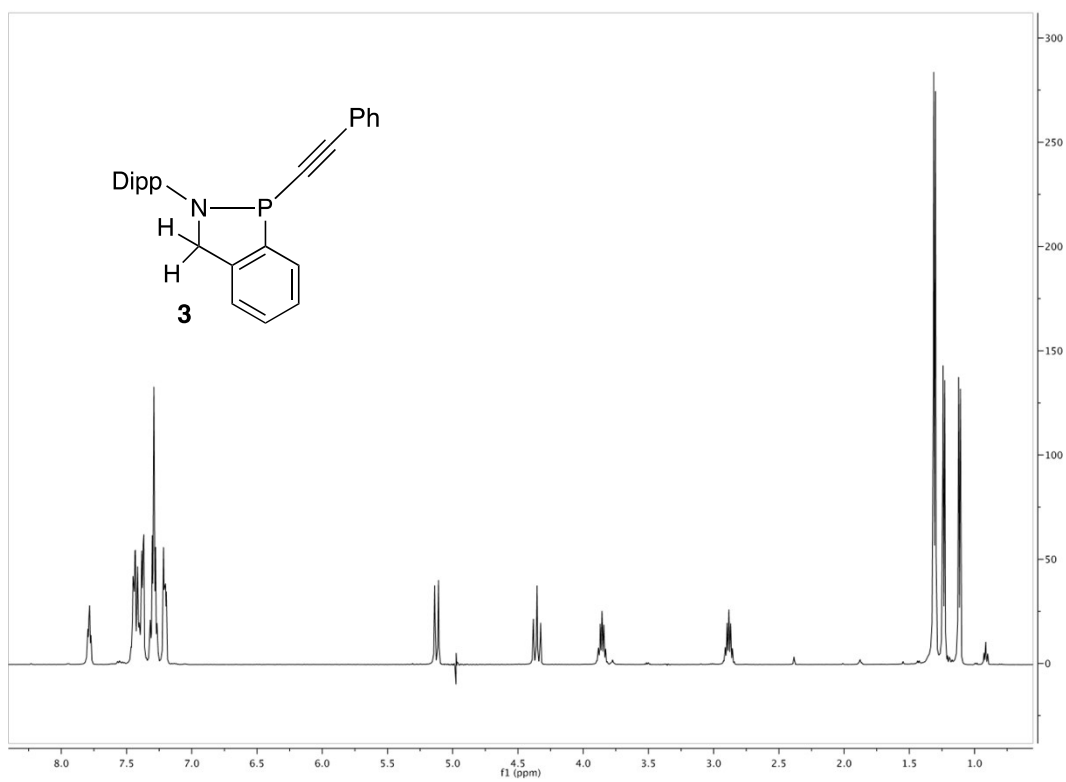



$^{13}\text{C}\{^1\text{H}\}$  NMR (125 MHz,  $\text{CDCl}_3$ )

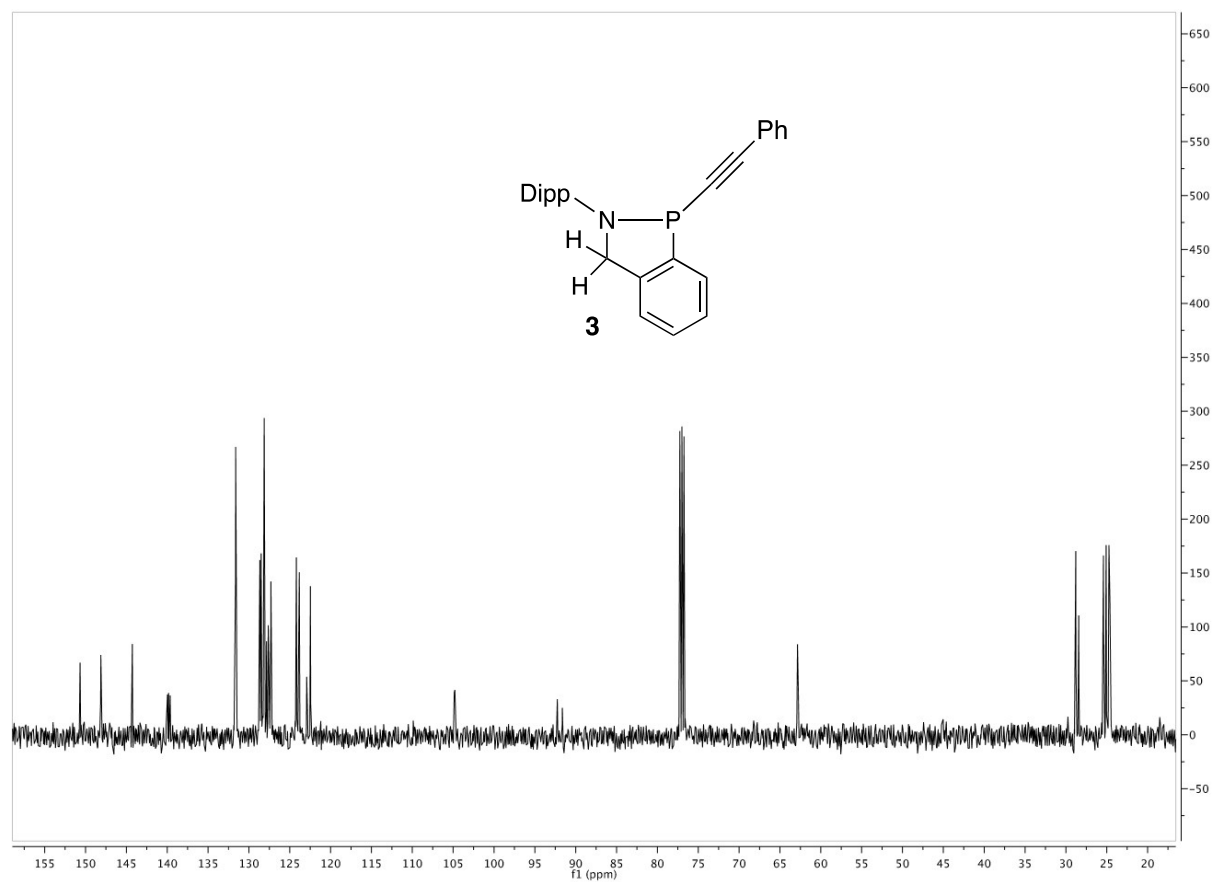

CENTC Elemental Analysis Facility  
University of Rochester  
Rochester, NY 14627 USA  
Email: ealab@chem.rochester.edu

|                       |                        |
|-----------------------|------------------------|
| <b>Date of report</b> | 11/22/2019 6:36:27PM   |
| <b>User ID</b>        | Administrator          |
| <b>Comments</b>       | DYZ-47 [ Cain / Zhou ] |

|             |                       |         |               |
|-------------|-----------------------|---------|---------------|
| DATE & TIME | 11/22/2019 4:29:22 PM | P_ID    | EA LAB        |
| SAMPLE ID   | 19630                 | USER ID | Administrator |
| WEIGHT (mg) | 1.907                 | MODE    | CHN           |

|          |         |
|----------|---------|
| CARBON   | 81.093% |
| HYDROGEN | 6.968%  |
| NITROGEN | 3.226%  |

#### Special Handling

The sample was transferred under argon and was combusted in a tin capsule that was crimp-sealed with a die apparatus.

#### Acknowledgment

Analytical data were obtained from the CENTC Elemental Analysis Facility at the University of Rochester, funded by NSF CHE-0650456.

#### Instrumentation

Microanalysis samples were weighed with a PerkinElmer Model AD6000 Autobalance and their compositions were determined with a PerkinElmer 2400 Series II Analyzer. Air-sensitive samples were handled in a VAC Atmospheres glovebox.

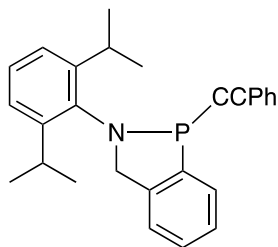

Chemical Formula:  $C_{27}H_{28}NP$   
Exact Mass: 397.1959  
Molecular Weight: 397.5018  
Elemental Analysis: C, 81.58; H, 7.10; N, 3.52; P, 7.79

## Synthesis of 4

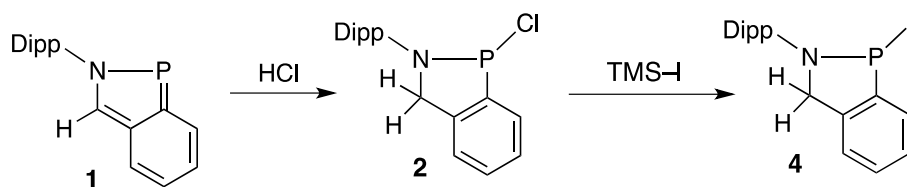

Compound **1** (0.250 g, 0.85 mmol) and a stir bar were loaded in a Schlenk bomb inside the glovebox and dissolved in 10 mL of toluene. The bomb was taken outside the glovebox and HCl (4 N in 1,4-dioxane, 0.425 mL, 1.7 mmol, 2.00 equiv.) was injected through a septum via syringe under positive N<sub>2</sub> pressure. The mixture was stirred at room temperature for 15 min. The bomb was brought back into the glovebox and the reaction mixture was concentrated under vacuum. The residue was then dissolved in 10 mL of DCM, TMS-I (0.186 g, 0.93 mmol, 1.1 equiv.) was added dropwise, and the reaction mixture was stirred overnight then concentrated. The crude solid was recrystallized from a 2:1 mixture of Et<sub>2</sub>O/pentane at -35 °C, resulting in the precipitation of the product as a yellow crystalline solid (0.253 g, 0.60 mmol, 71%).

\*Initially, we attempted to prepare **4** using KI instead of TMS-I, which never fully converted **2** to **4**. Attempted purification of the **4:2** mixture by recrystallization from pentane at -35 °C afforded X-ray quality crystals in which the halogen site was refined as 75% I and 25% Cl with fixed P-X distances.\*

Anal. Calcd. for C<sub>27</sub>H<sub>28</sub>NP: C, 53.91; H, 5.48; N, 3.31. Found: C, 54.33; H, 5.56; N, 3.17. <sup>31</sup>P{<sup>1</sup>H} NMR (160 MHz, C<sub>7</sub>D<sub>8</sub>): δ 158.8. <sup>1</sup>H NMR (500 MHz, CDCl<sub>3</sub>): δ 7.96 (dd, *J* = 7, 3.5 Hz, 1H, Ar), 7.54-7.43 (m, 4H, Ar), 7.36-7.33 (m, 1H, Ar), 7.26-7.20 (m, 1H, Ar), 4.68 (br, 2H, CH<sub>2</sub>), 3.14 (br, 2H, CH), 1.30 (d, *J* = 6 Hz, 6H, Me), 1.19 (d, *J* = 6 Hz, 6H, CH<sub>3</sub>). <sup>13</sup>C{<sup>1</sup>H} NMR (125 MHz, CDCl<sub>3</sub>): δ 157.8 (Ar), 143.9 (Ar), 143.0 (d, *J* = 28 Hz, Ar), 136.4 (d, *J* = 12 Hz, Ar), 130.1 (Ar), 128.6 (Ar), 128.2 (Ar), 128.1 (d, *J* = 20 Hz, Ar), 124.7 (Ar), 122.3 (Ar), 65.2 (d, *J* = 17 Hz, CH<sub>2</sub>), 28.5 (Me), 25.1 (overlapping CH and Me).

$^{31}\text{P}\{^1\text{H}\}$  NMR (160 MHz,  $\text{C}_7\text{D}_8$ )

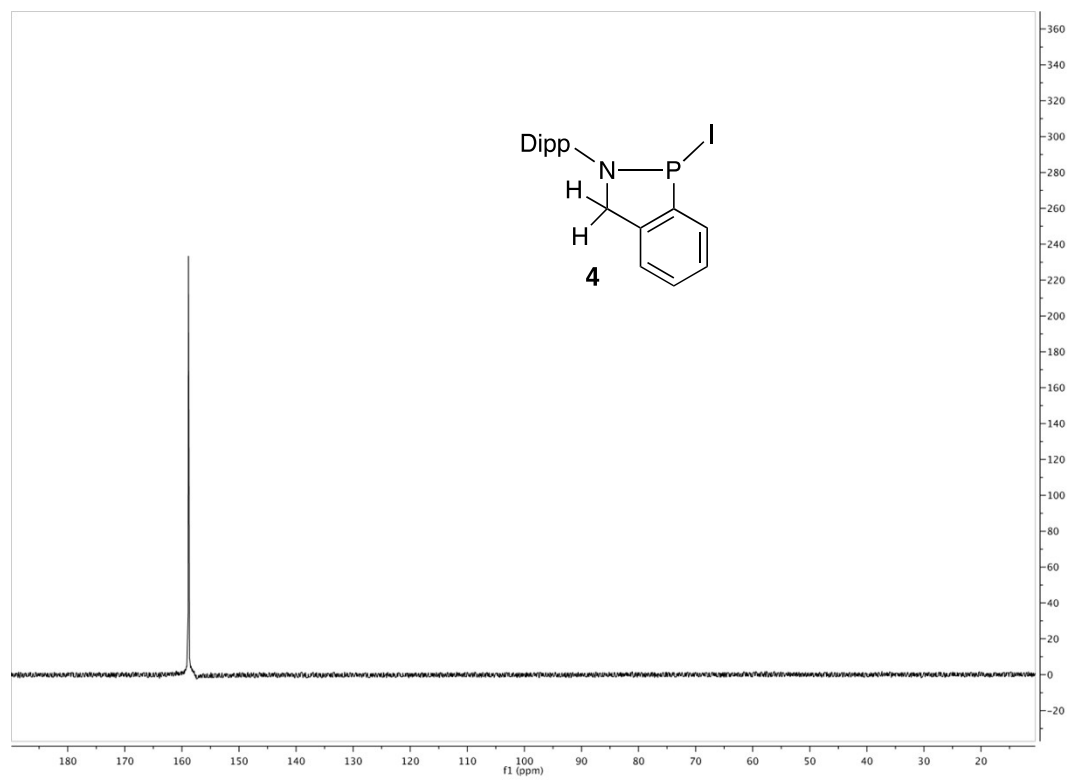

$^1\text{H}$  NMR (500 MHz,  $\text{CDCl}_3$ )

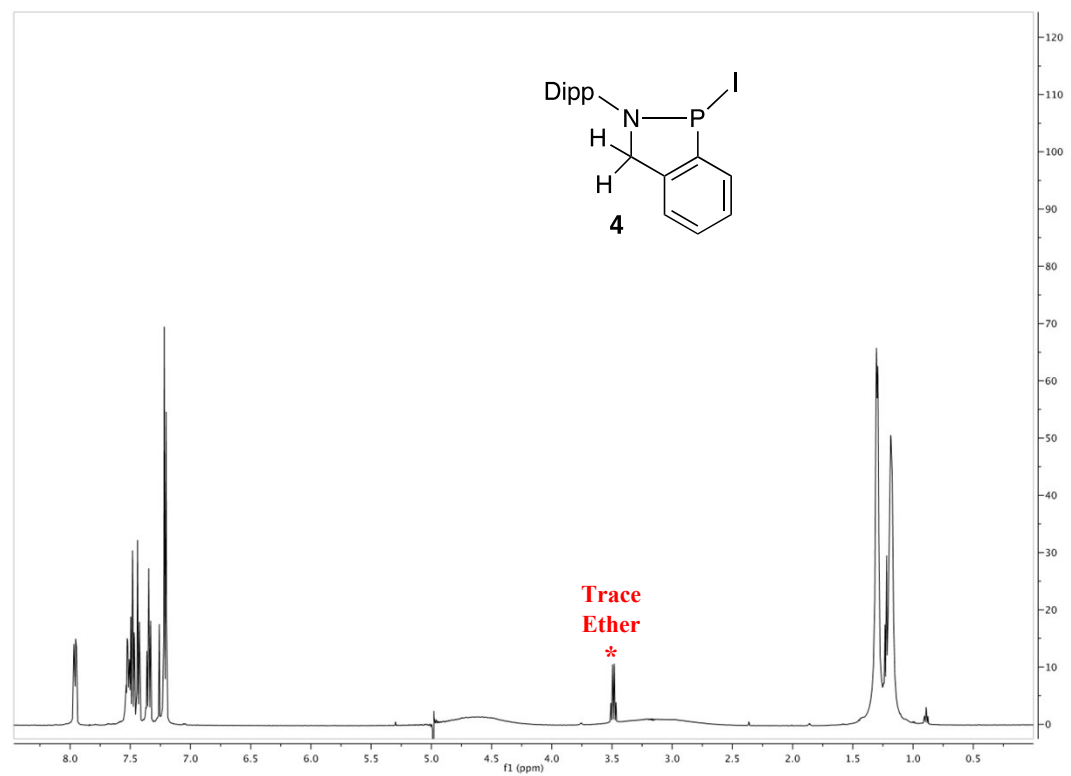

$^{13}\text{C}\{^1\text{H}\}$  NMR (125 MHz,  $\text{CDCl}_3$ )

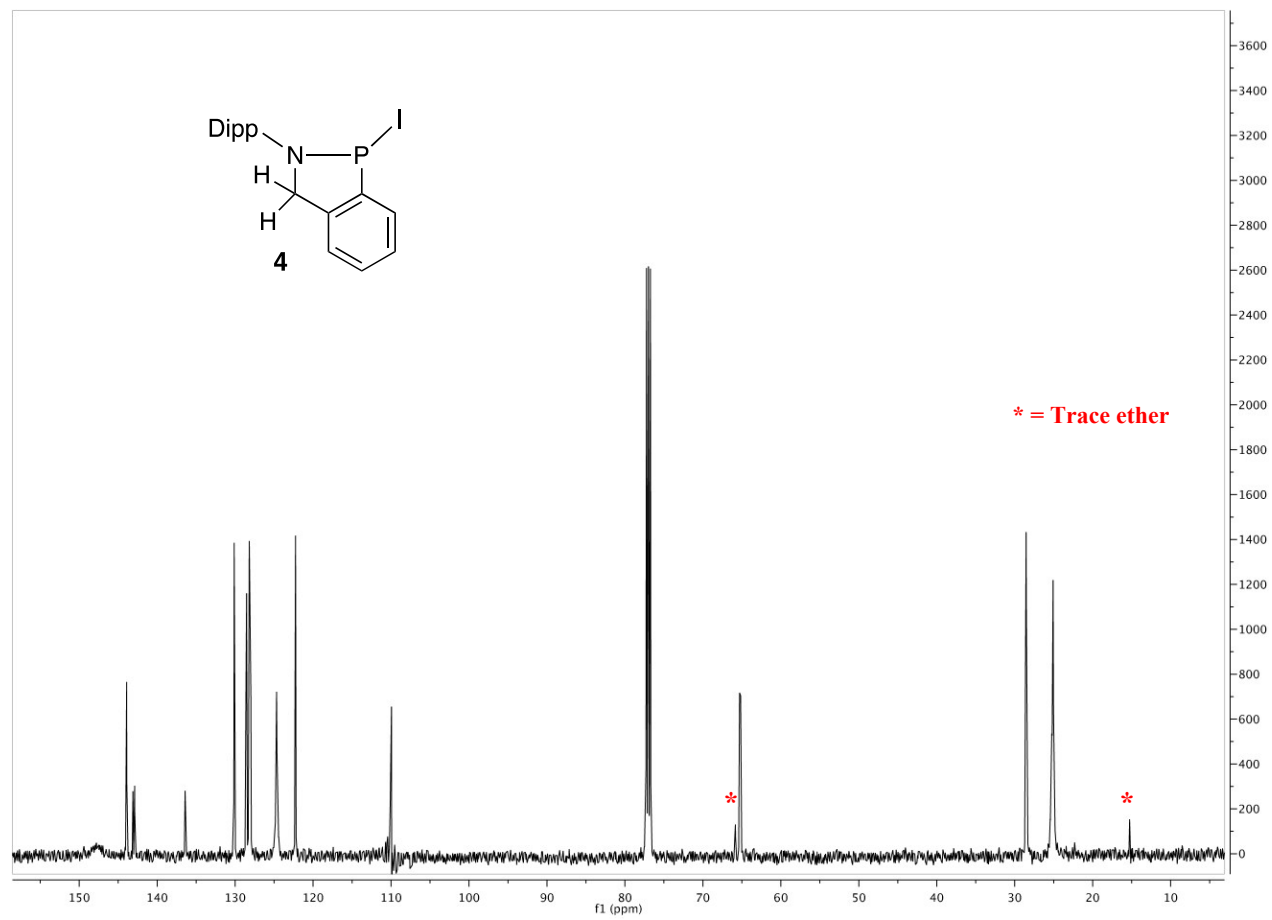

**VT NMR spectroscopy**  
**-60 °C (top) to +60 °C (bottom), 15 ° intervals**  
**<sup>1</sup>H NMR (500 MHz, C<sub>7</sub>D<sub>8</sub>)**

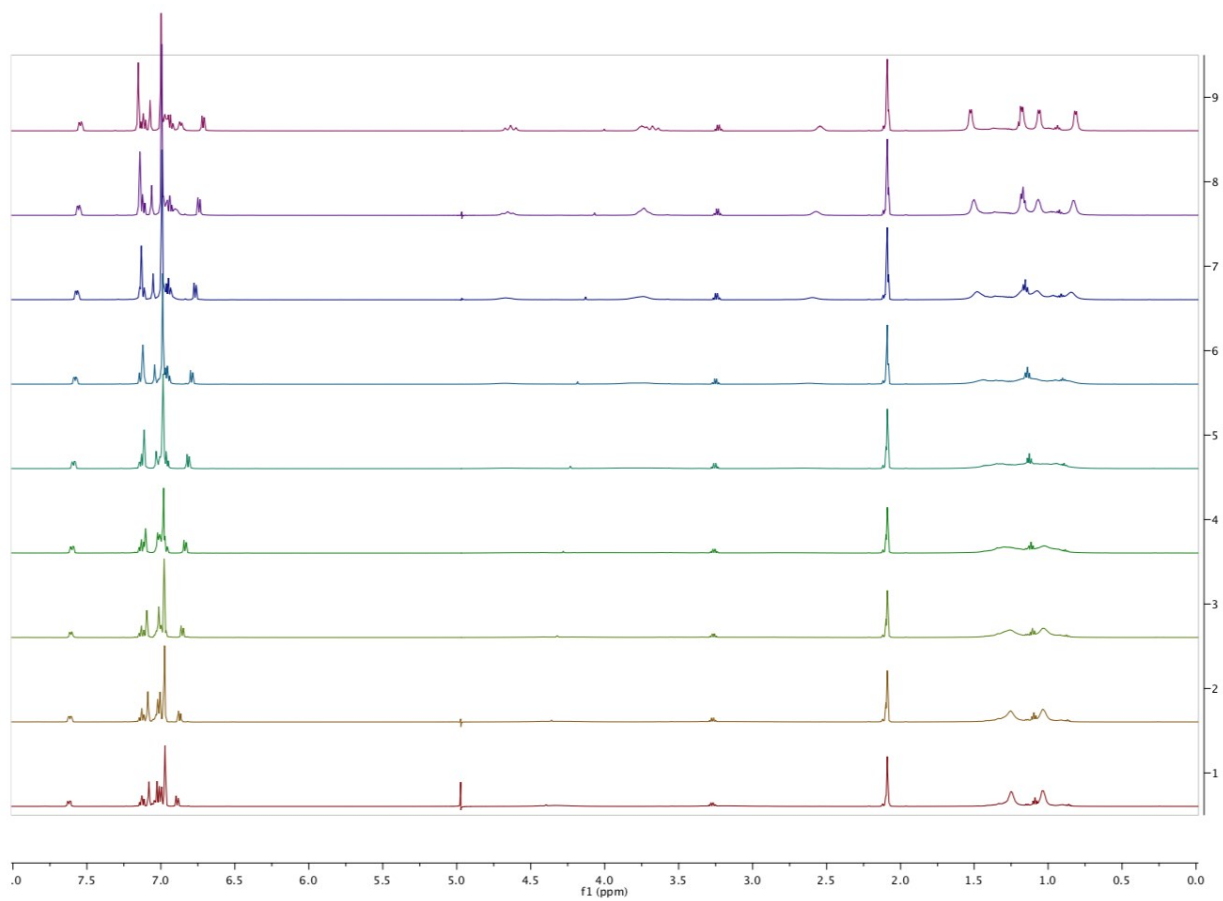

CENTC Elemental Analysis Facility  
University of Rochester  
Rochester, NY 14627 USA  
Email: ealab@chem.rochester.edu

**Date of report** 3/20/2020 3:37:24PM

**User ID** Administrator

**Comments** DZ-56 [ Cain / Zhou ]

|             |                      |         |               |
|-------------|----------------------|---------|---------------|
| DATE & TIME | 3/20/2020 2:32:45 PM | P_ID    | EA LAB        |
| SAMPLE ID   | 20095                | USER ID | Administrator |
| WEIGHT (mg) | 2.439                | MODE    | CHN           |

|          |         |
|----------|---------|
| CARBON   | 54.327% |
| HYDROGEN | 5.563%  |
| NITROGEN | 3.169%  |

#### Special Handling

The sample was transferred under argon and was combusted in a tin capsule that was crimp-sealed with a die apparatus.

#### Acknowledgment

Analytical data were obtained from the CENTC Elemental Analysis Facility at the University of Rochester, funded by NSF CHE-0650456.

#### Instrumentation

Microanalysis samples were weighed with a PerkinElmer Model AD6000 Autobalance and their compositions were determined with a PerkinElmer 2400 Series II Analyzer. Air-sensitive samples were handled in a VAC Atmospheres glovebox.

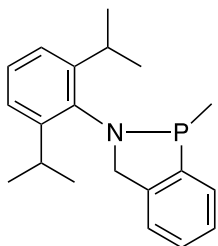

Chemical Formula: C<sub>19</sub>H<sub>23</sub>INP

Exact Mass: 423.0613

Molecular Weight: 423.2782

Elemental Analysis: C, 53.91; H, 5.48; I, 29.98; N, 3.31; P, 7.32

## Synthesis of 5-*p*-MeC<sub>6</sub>H<sub>4</sub>.

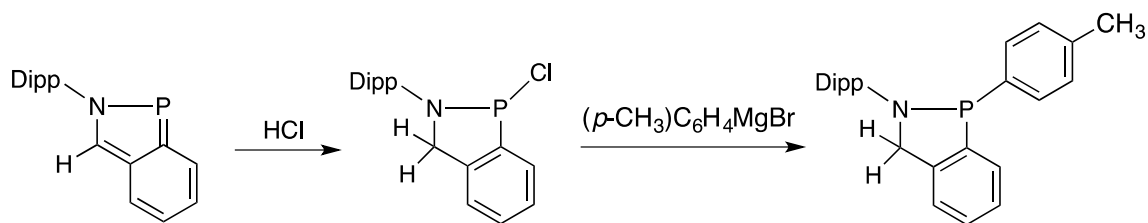

Compound **1** (200 mg, 0.677 mmol) and a stir bar were loaded in a Schlenk bomb inside the glovebox and dissolved in 4 mL of toluene. The bomb was taken outside of the glovebox and HCl (4 N in 1,4-dioxane, 340  $\mu$ L, 1.35 mmol, 2.00 equiv) was injected through a septum via syringe under positive N<sub>2</sub> pressure. The mixture was stirred at room temperature for 15 min. The bomb was brought back into the glovebox, and the reaction mixture was concentrated under vacuum. The residue was washed with 5 mL of pentane, re-concentrated, and then dissolved in 5 mL of THF. The bomb was taken back outside the glovebox and placed in an ice bath at 0 °C and (*p*-Me)C<sub>6</sub>H<sub>4</sub>MgBr (1.0 M in THF, 1.35 mL, 1.35 mmol, 2.00 equiv) was injected through a septum via syringe under positive N<sub>2</sub> pressure. The reaction mixture was warmed to room temperature over the course of 30 min and then brought back inside the glovebox and concentrated under vacuum. The residue was suspended in 5 mL of pentane, filtered through a Celite plug, and then washed with an additional 5 mL of pentane. The filtrates were combined and concentrated to ~5 mL and put in the freezer at -35 °C, resulting in the precipitation of the product as a white crystalline solid (89 mg, 0.230 mmol, 34%). Dissolving 10 mg of this solid in 3 mL of acetonitrile, followed by subsequent cooling to -35 °C afforded X-ray quality crystals.

Anal. Calcd. for C<sub>26</sub>H<sub>30</sub>NP: C, 80.59; H, 7.80; N, 3.61. Found: C, 80.25; H, 7.78; N, 3.73. <sup>31</sup>P{<sup>1</sup>H} NMR (160 MHz, CDCl<sub>3</sub>):  $\delta$  66.9. <sup>1</sup>H NMR (500 MHz, CDCl<sub>3</sub>):  $\delta$  7.49-7.33 (m, 4H, Ar), 7.23-7.14 (m, 4H, Ar), 7.06-7.00 (m, 3H, Ar), 5.13 (d, *J* = 15 Hz, 1H, CH<sub>2</sub>), 4.38 (dd, *J* = 15, 10 Hz, 1H, CH<sub>2</sub>), 2.98 (septet, *J* = 7 Hz, 1H, CH), 2.92 (septet, *J* = 7 Hz, 1H, CH), 2.30 (3H, Me), 1.30 (d, *J* = 7 Hz, 3H, Me), 1.10 (d, *J* = 7 Hz, 3H, Me), 1.04 (d, *J* = 7 Hz, 3H, Me), 0.47 (d, *J* = 7 Hz, 3H, Me). <sup>13</sup>C{<sup>1</sup>H} NMR (125 MHz, CDCl<sub>3</sub>):  $\delta$  150.3 (Ar), 148.4 (Ar), 144.2 (Ar), 142.4 (Ar), 141.2 (d, *J* = 17 Hz, Ar), 140.7 (d, *J* = 40 Hz, Ar), 139.7 (Ar), 132.8 (d, *J* = 23 Hz), 128.8 (d, *J* = 7 Hz, Ar), 128.5 (d, *J* = 25 Hz, Ar), 128.2 (Ar), 127.4 (d, *J* = 8 Hz, Ar), 126.8 (Ar), 124.4 (Ar), 123.5 (Ar), 122.2 (Ar), 63.5 (d, *J* = 10 Hz, CH<sub>2</sub>), 28.3 (d, *J* = 6 Hz, CH), 28.2 (CH), 25.0 (Me), 24.7 (Me), 24.6 (Me), 23.8 (Me), 21.4 (Me).



$^{31}\text{P}\{^1\text{H}\}$  NMR (160 MHz,  $\text{CDCl}_3$ )

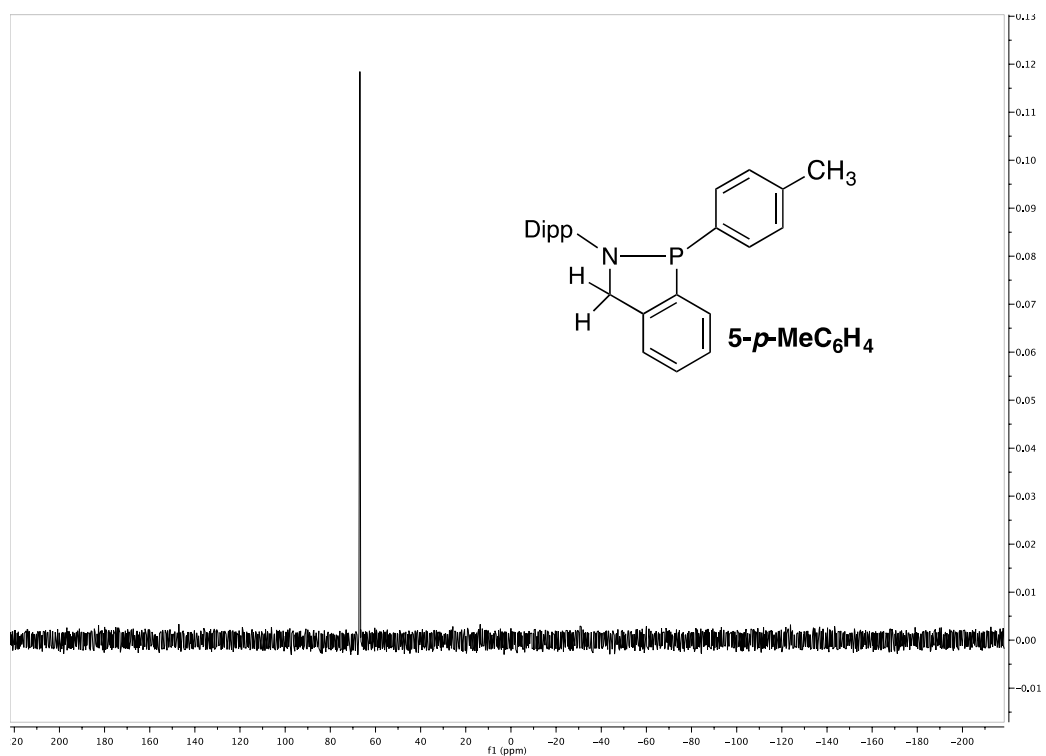

$^1\text{H}$  NMR (500 MHz,  $\text{CDCl}_3$ )

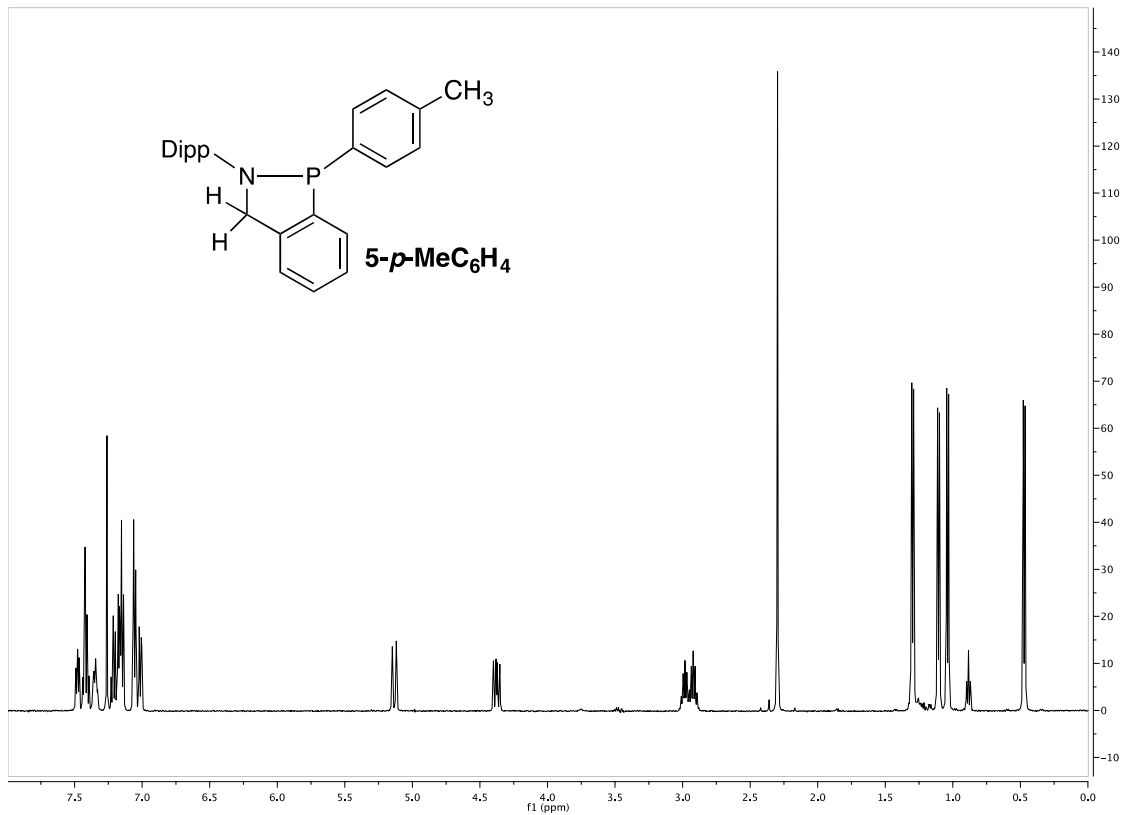

$^{13}\text{C}\{^1\text{H}\}$  NMR (125 MHz,  $\text{CDCl}_3$ )

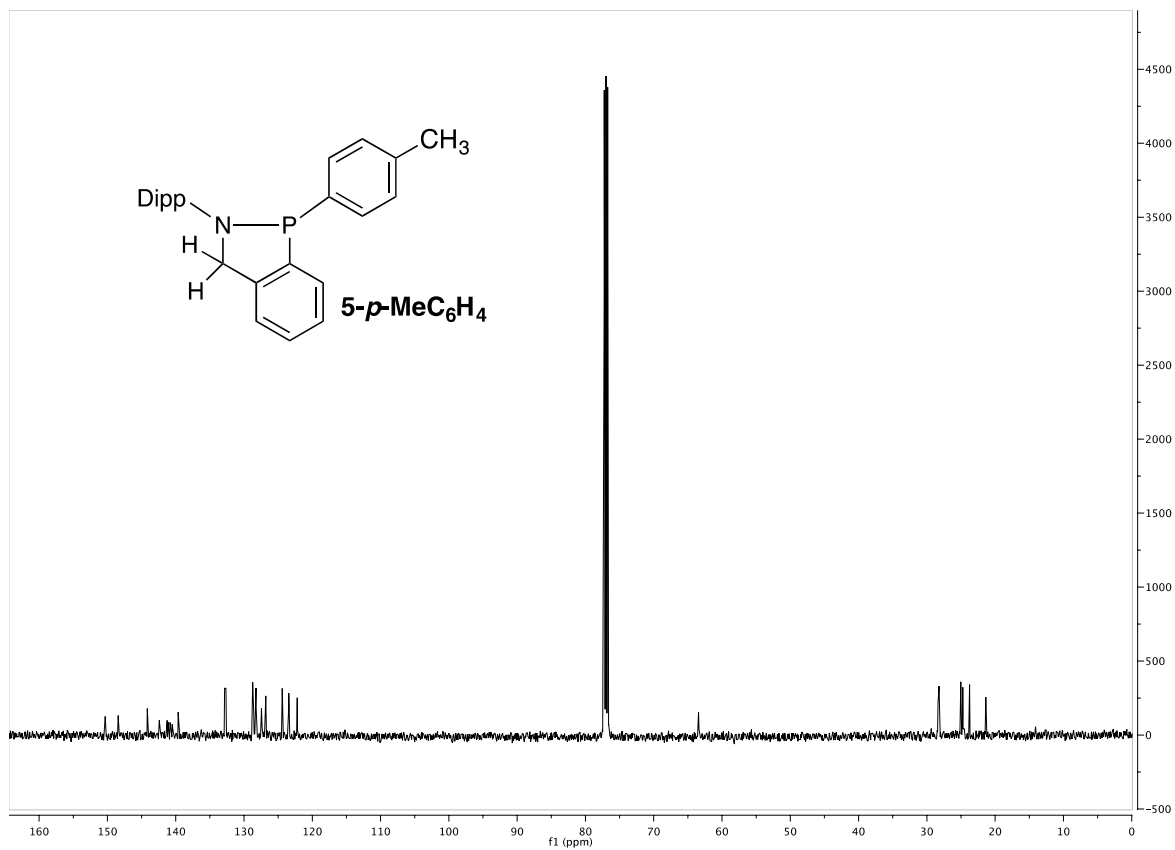

CENTC Elemental Analysis Facility  
University of Rochester  
Rochester, NY 14627 USA  
Email: ealab@chem.rochester.edu

|                       |                     |
|-----------------------|---------------------|
| <b>Date of report</b> | 6/26/2020 1:33:08PM |
| <b>User ID</b>        | Administrator       |
| <b>Comments</b>       | MC 4-49 [Cain]      |

|             |                      |         |               |
|-------------|----------------------|---------|---------------|
| DATE & TIME | 6/26/2020 1:31:53 PM | P_ID    | EA LAB        |
| SAMPLE ID   | 20146                | USER ID | Administrator |
| WEIGHT (mg) | 2.474                | MODE    | CHN           |

|          |         |
|----------|---------|
| CARBON   | 80.251% |
| HYDROGEN | 7.780%  |
| NITROGEN | 3.728%  |

#### Special Handling

The sample was transferred under argon and was combusted in a tin capsule that was crimp-sealed with a die apparatus.

#### Acknowledgment

Analytical data were obtained from the CENTC Elemental Analysis Facility at the University of Rochester, funded by NSF CHE-0650456.

#### Instrumentation

Microanalysis samples were weighed with a PerkinElmer Model AD6000 Autobalance and their compositions were determined with a PerkinElmer 2400 Series II Analyzer. Air-sensitive samples were handled in a VAC Atmospheres glovebox.

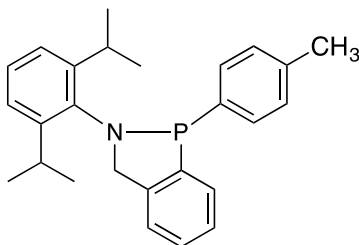

Chemical Formula:  $C_{26}H_{30}NP$

Exact Mass: 387.2116

Molecular Weight: 387.5068

m/z: 387.2116 (100.0%), 388.2149 (28.1%), 389.2183 (2.7%), 389.2183 (1.1%)

Elemental Analysis: C, 80.59; H, 7.80; N, 3.61; P, 7.99

## Generation of 5-*p*-FC<sub>6</sub>H<sub>4</sub>.

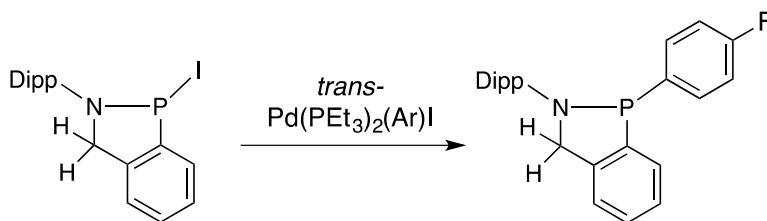

Compounds **4** (58 mg, 0.137 mmol) and **D** (78 mg, 0.137 mmol) were combined in a vial, dissolved in 5 mL of toluene, and transferred to a Schlenk bomb inside the glovebox. The bomb was taken outside the glovebox and placed in an oil bath at 120 °C. After 24 h, <sup>31</sup>P{<sup>1</sup>H} NMR spectroscopy revealed the formation of **5-*p*-FC<sub>6</sub>H<sub>4</sub>** (65.6 ppm) and *trans*-PdI<sub>2</sub>(PEt<sub>3</sub>)<sub>2</sub> (8.0 ppm) as the major products accompanied by a trace amount of **1** (182.2 ppm) and presumably *trans*-Pd(*p*-FC<sub>6</sub>H<sub>4</sub>)<sub>2</sub>(PEt<sub>3</sub>)<sub>2</sub> (16.7 ppm). The reaction mixture was subsequently brought back inside the glovebox and concentrated under vacuum. The crude product mixture was recrystallized from CH<sub>3</sub>CN, which removed **1** and *trans*-Pd(*p*-FC<sub>6</sub>H<sub>4</sub>)<sub>2</sub>(PEt<sub>3</sub>)<sub>2</sub>. Dissolving the remaining two components of the precipitate in 1 mL of pentane followed by filtration through a silica plug, followed by further elution with 2-3 mL of pentane afforded a filtrate with only a single <sup>31</sup>P NMR (121 MHz, CDCl<sub>3</sub>) signal (65.9 ppm). Concentration of the filtrate under vacuum afforded 7 mg of a slightly impure white solid by <sup>1</sup>H and <sup>13</sup>C{<sup>1</sup>H} NMR spectroscopy. Diagnostic <sup>1</sup>H NMR (500 MHz, CDCl<sub>3</sub>): δ 5.12 (d, *J* = 15 Hz, 1H, CH<sub>2</sub>), 4.38 (dd, *J* = 15, 15 Hz, 1H, CH<sub>2</sub>), 2.95 (septet, *J* = 7 Hz, 1H, CH), 2.87 (septet, *J* = 7 Hz, 1H, CH).

<sup>31</sup>P{<sup>1</sup>H} NMR (121 MHz, CDCl<sub>3</sub>)

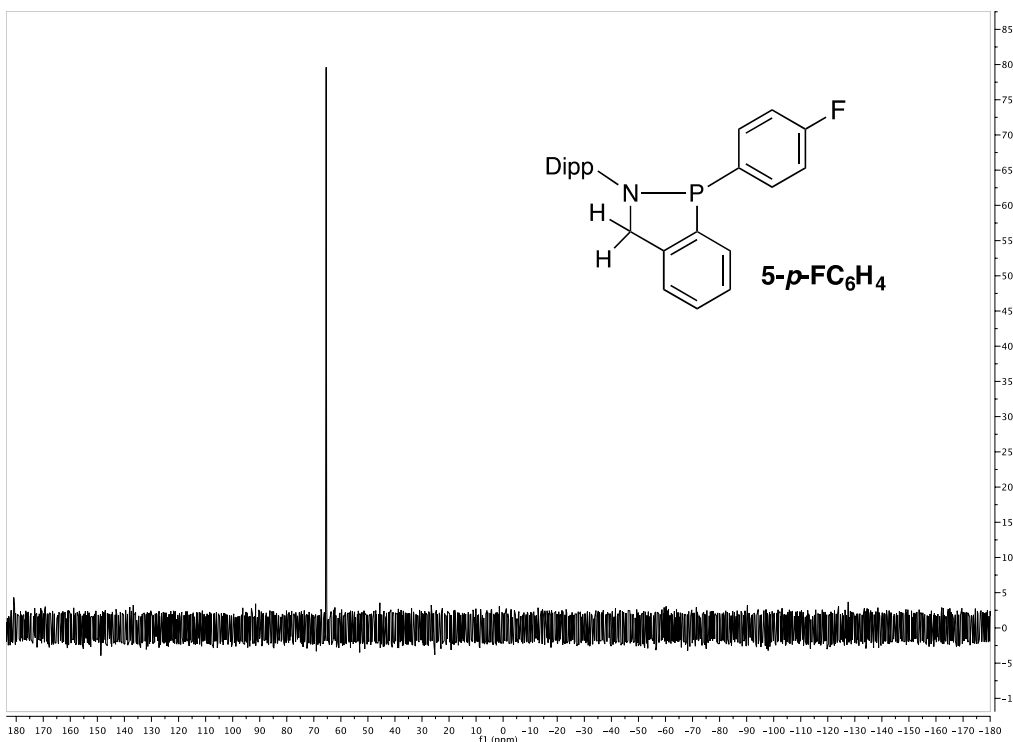

## Synthesis of 6-Pd<sub>2</sub>-(P(*t*-Bu)<sub>3</sub>)<sub>2</sub>.

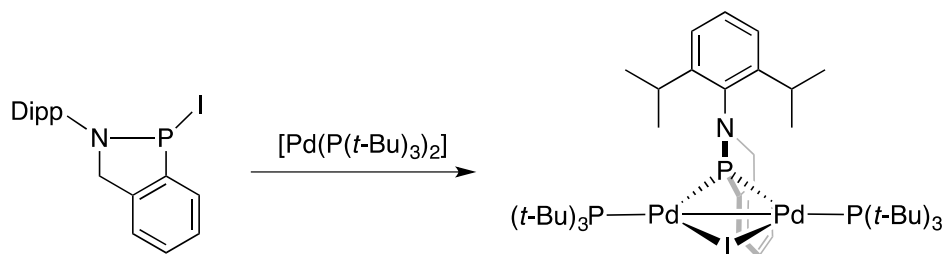

**Synthesis of 6-Pd<sub>2</sub>-(P(*t*-Bu)<sub>3</sub>)<sub>2</sub>. 1:1 Stoichiometry.** Compound **4** (50 mg, 0.118 mmol), [Pd(P(*t*-Bu)<sub>3</sub>)<sub>2</sub>] (60 mg, 0.118 mmol), and a stir bar were combined in a vial and dissolved in 3 mL of toluene, resulting in a dark reaction mixture. After 24 h at room temperature, <sup>31</sup>P{<sup>1</sup>H} NMR spectroscopy revealed that **4** had been consumed. The reaction mixture was subsequently concentrated under vacuum, and the dark residue was extracted with pentane (2 x 5 mL) and filtered through a Celite plug. The filtrate was concentrated under vacuum and re-dissolved in 2 mL of ether, followed by the addition of 4 mL of acetonitrile. The Et<sub>2</sub>O/CH<sub>3</sub>CN solution was then cooled to -35 °C, leading to the precipitation of dark crystals suitable for X-ray diffraction (< 10 mg).

**1:2 Stoichiometry.** Compound **4** (31 mg, 0.0732 mmol), [Pd(P(*t*-Bu)<sub>3</sub>)<sub>2</sub>] (75 mg, 0.147 mmol, 2 equiv), and a stir bar were combined in a vial and dissolved in 3 mL of toluene, resulting in a dark reaction mixture. After 24 h at room temperature, <sup>31</sup>P{<sup>1</sup>H} NMR spectroscopy revealed that **4** had been consumed. The reaction mixture was concentrated under vacuum, pentane was added, and the mixture was re-concentrated. Extraction of the dark residue with additional pentane (3 x 5 mL) followed by filtration through a Celite plug afforded a dark filtrate that was concentrated under vacuum. The crude product mixture was dissolved in 2 mL of ether, 4 mL of acetonitrile was added, and the solution was cooled to -35 °C, resulting in the precipitation of dark crystalline solid. In order to remove an unidentified impurity (<sup>31</sup>P NMR (C<sub>6</sub>D<sub>6</sub>): 84.7 ppm) that was not present in the 1:1 stoichiometric case, the crystalline solid was washed with cold pentane, affording analytically pure material (23 mg, 0.0220 mmol, 30%).

Anal. Calcd. for C<sub>43</sub>H<sub>77</sub>INP<sub>3</sub>Pd<sub>2</sub>: C, 49.62; H, 7.46; N, 1.35. Found: C, 49.60; H, 7.51; N, 1.32. <sup>31</sup>P{<sup>1</sup>H} NMR (160 MHz, C<sub>6</sub>D<sub>6</sub>): δ 275.8 (t, *J* = 73 Hz, PN), 96.5 (d, *J* = 73 Hz, P(*t*-Bu)<sub>3</sub>). <sup>1</sup>H NMR (500 MHz, C<sub>6</sub>D<sub>6</sub>): δ 7.90 (t, *J* = 7 Hz, 1H, Ar), 7.14-7.06 (br m, 5H, overlapping Ar), 6.96 (d, *J* = 7 Hz, 1H, Ar), 4.46 (br, 2H, CH<sub>2</sub>), 3.85 (septet, *J* = 7 Hz, 2H, CH), 1.45 (br, 6H, Me), 1.30 (br m, 60H, overlapping *t*-Bu and Me). <sup>13</sup>C{<sup>1</sup>H} NMR (125 MHz, C<sub>6</sub>D<sub>6</sub>): δ 147.1 (Ar), 146.4 (Ar), 140.4 (Ar), 139.7 (Ar), 129.2 (d, *J* = 24 Hz, Ar), 128.8 (Ar), 127.4 (d, *J* = 11 Hz, Ar), 126.8 (Ar), 125.3 (Ar), 122.3 (Ar), 63.9 (CH<sub>2</sub>), 36.5 (quat), 32.8 (*t*-Bu), 29.0 (CH), 27.9 (Me), 25.6 (Me).

$^{31}\text{P}\{^1\text{H}\}$  NMR (160 MHz,  $\text{C}_6\text{D}_6$ )

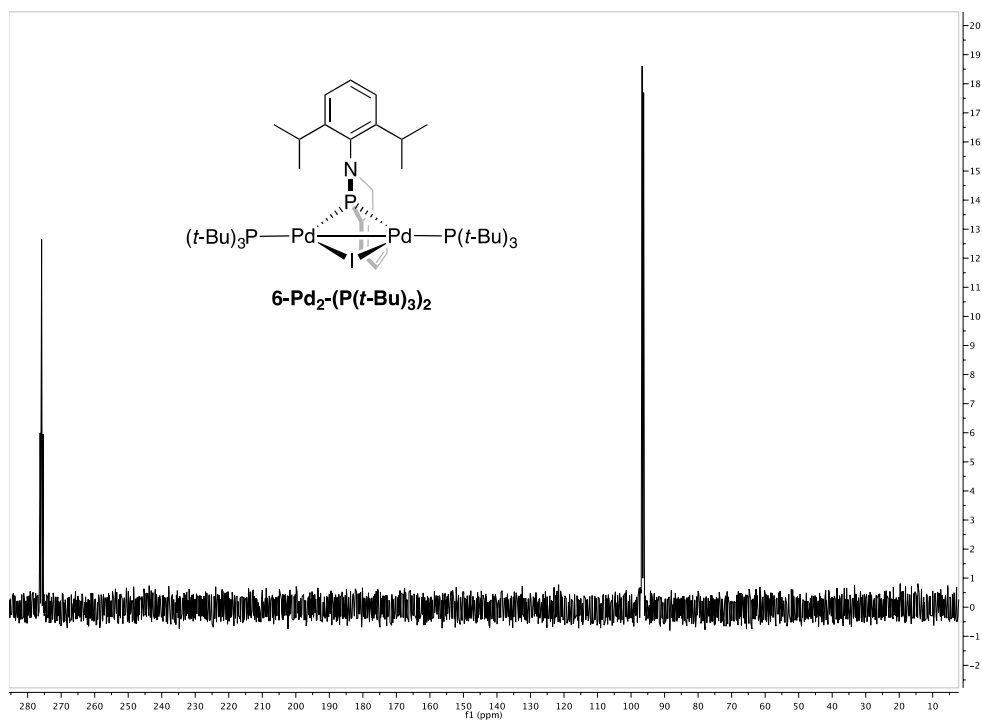

$^1\text{H}$  NMR (500 MHz,  $\text{C}_6\text{D}_6$ )

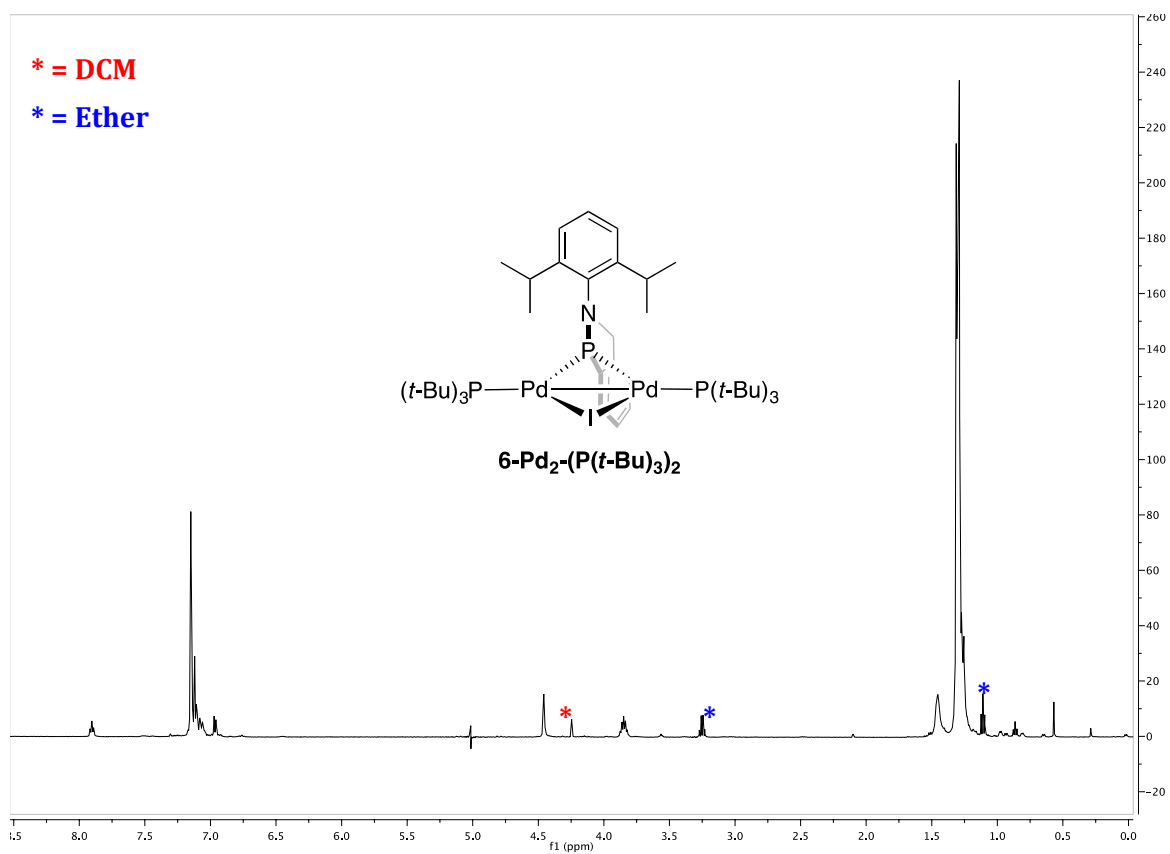

$^{13}\text{C}\{^1\text{H}\}$  NMR (125 MHz,  $\text{C}_6\text{D}_6$ )

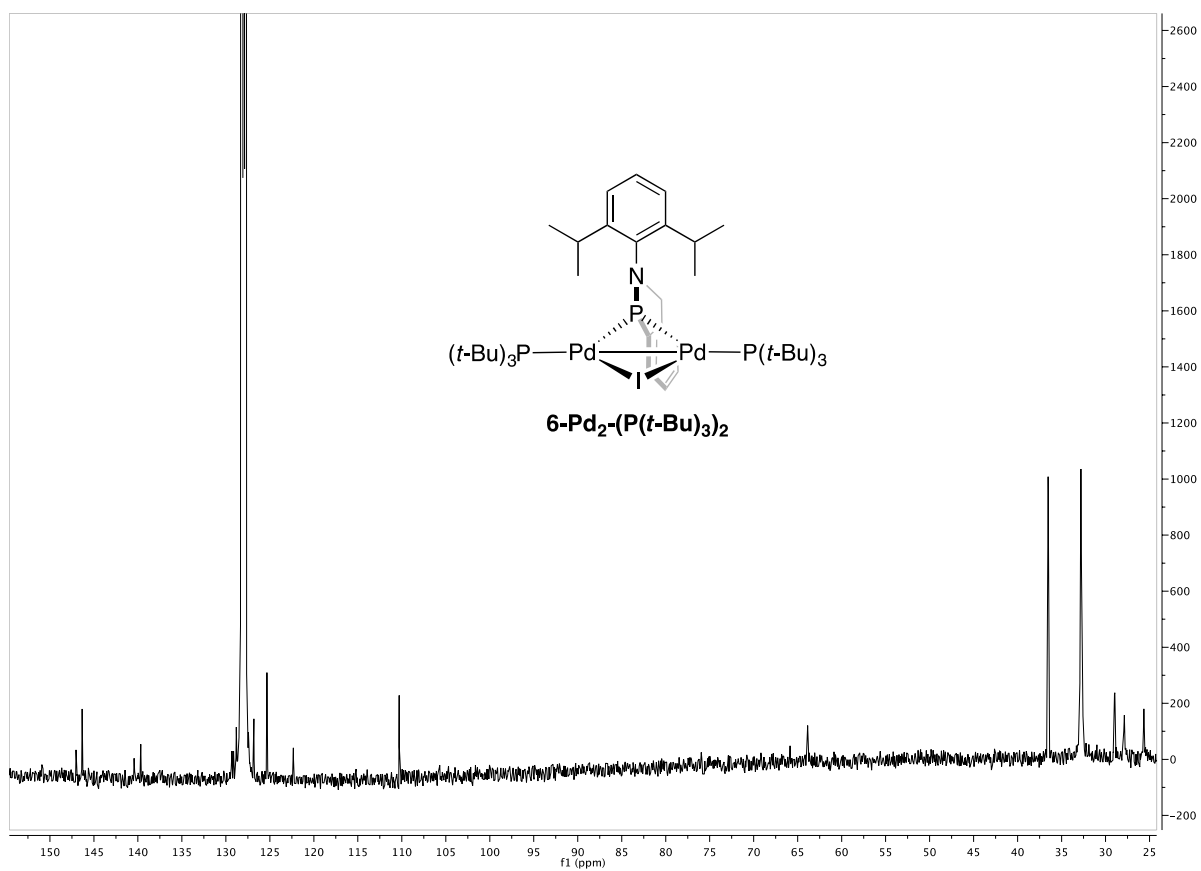

CENTC Elemental Analysis Facility  
University of Rochester  
Rochester, NY 14627 USA  
Email: ealab@chem.rochester.edu

**Date of report** 10/9/2020 3:00:41PM

**User ID** Administrator

**Comments** MC 5-18 [Cain]

|             |                       |         |               |
|-------------|-----------------------|---------|---------------|
| DATE & TIME | 10/9/2020 10:26:18 AM | P_ID    | EA LAB        |
| SAMPLE ID   | 20307                 | USER ID | Administrator |
| WEIGHT (mg) | 2.138                 | MODE    | CHN           |

|          |         |
|----------|---------|
| CARBON   | 49.599% |
| HYDROGEN | 7.507%  |
| NITROGEN | 1.323%  |

#### Acknowledgment

Analytical data were obtained from the CENTC Elemental Analysis Facility at the University of Rochester, funded by NSF CHE-0650456.

#### Instrumentation

Microanalysis samples were weighed with a PerkinElmer Model AD6000 Autobalance and their compositions were determined with a PerkinElmer 2400 Series II Analyzer.

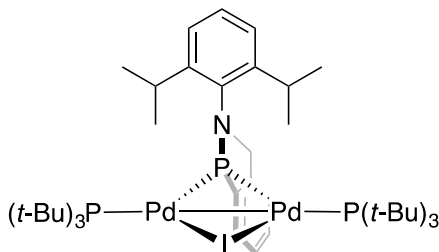

Chemical Formula:  $C_{43}H_{77}INP_3Pd_2$

Exact Mass: 1039.2383

Molecular Weight: 1040.7618

Elemental Analysis: C, 49.62; H, 7.46; I, 12.19; N, 1.35; P, 8.93; Pd, 20.45



## Synthesis of 7.

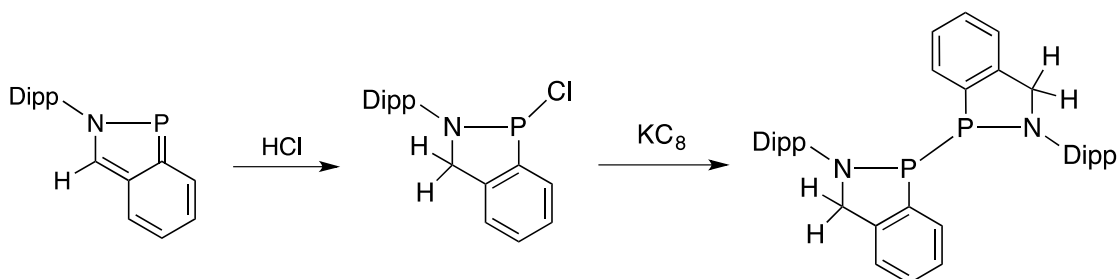

Compound **1** (200 mg, 0.68 mmol) and a stir bar were loaded in a Schlenk bomb inside the glovebox and dissolved in 5 mL of toluene. The bomb was taken outside the glovebox and HCl (4 N in 1,4-dioxane, 0.34 mL, 1.36 mmol, 2.00 equiv.) was injected through a septum via syringe under positive N<sub>2</sub> pressure. The reaction mixture was stirred at room temperature for 15 min. The bomb was then brought back into the glovebox, and the reaction mixture was concentrated under vacuum. The residue was washed with 10 mL of pentane, concentrated under vacuum, and then dissolved in 10 mL of THF. Solid KC<sub>8</sub> (0.100 g, 0.74 mmol, 1.1 equiv.) was added, and the reaction mixture was stirred overnight. The heterogeneous mixture was concentrated under vacuum, extracted with pentane, and filtered through a Celite plug. The filtrate was transferred to a 25 mL Schlenk bomb and concentrated again. Anhydrous octane (10 mL) was added to give a slurry and the Schlenk bomb was taken outside the glovebox. The slurry was heated at 70 °C until it became homogenous. The solution was then cooled to room temperature, resulting in the precipitation of white X-ray quality crystals (87 mg, 0.15 mmol, 43%).

Anal. Calcd. for C<sub>38</sub>H<sub>46</sub>N<sub>2</sub>P<sub>2</sub>: C, 77.00; H, 7.82; N, 4.73. Found: C, 76.96; H, 8.09; N, 4.44. <sup>31</sup>P{<sup>1</sup>H} NMR (160 MHz, CDCl<sub>3</sub>): δ 93.3. <sup>1</sup>H NMR (500 MHz, C<sub>6</sub>D<sub>6</sub>): δ 7.15-7.13 (m, 2H, Ar), 7.11-6.98 (m, 6H, Ar), 6.90-6.85 (m, 4H, Ar), 6.61 (d, *J* = 7.5 Hz, 2H, Ar), 5.26 (d, *J* = 15 Hz, 2H, CH<sub>2</sub>), 4.24-4.15 (overlapping m, 4H, overlapping CH w/ diastereotopic CH<sub>2</sub>), 3.18 (septet, *J* = 7 Hz, 2H, CH), 1.36 (d, *J* = 7 Hz, 6H, CH<sub>3</sub>), 1.26 (d, *J* = 7 Hz, 6H, CH<sub>3</sub>), 0.94 (d, *J* = 7 Hz, 6H, CH<sub>3</sub>), 0.79 (d, *J* = 7 Hz, 6H, CH<sub>3</sub>). <sup>13</sup>C{<sup>1</sup>H} NMR (125 MHz, C<sub>6</sub>D<sub>6</sub>): δ 150.3 (Ar), 148.3 (Ar), 144.7 (Ar), 129.9 (t, *J* = 13 Hz, Ar), 127.4 (Ar), 126.5 (Ar), 124.8 (Ar), 124.1 (Ar), 121.2 (Ar), 64.6 (CH<sub>2</sub>), 29.0 (CH), 28.8 (CH), 26.1 (Me), 25.2 (Me), 24.6 (Me), 23.3 (Me). Once isolated, diphosphine **7** routinely decomposed in solution. In CDCl<sub>3</sub>, the decomposition was fast, but even in C<sub>6</sub>D<sub>6</sub>, slow decomposition was apparent as evidenced by the appearance of other diastereotopic-type CH<sub>2</sub> and *N*-Dipp methyl signals. The <sup>13</sup>C{<sup>1</sup>H} NMR spectrum has fewer than the expected amount of Ar resonances likely due to overlap with the residual solvent signal.

$^{31}\text{P}\{^1\text{H}\}$  NMR (160 MHz,  $\text{CDCl}_3$ )

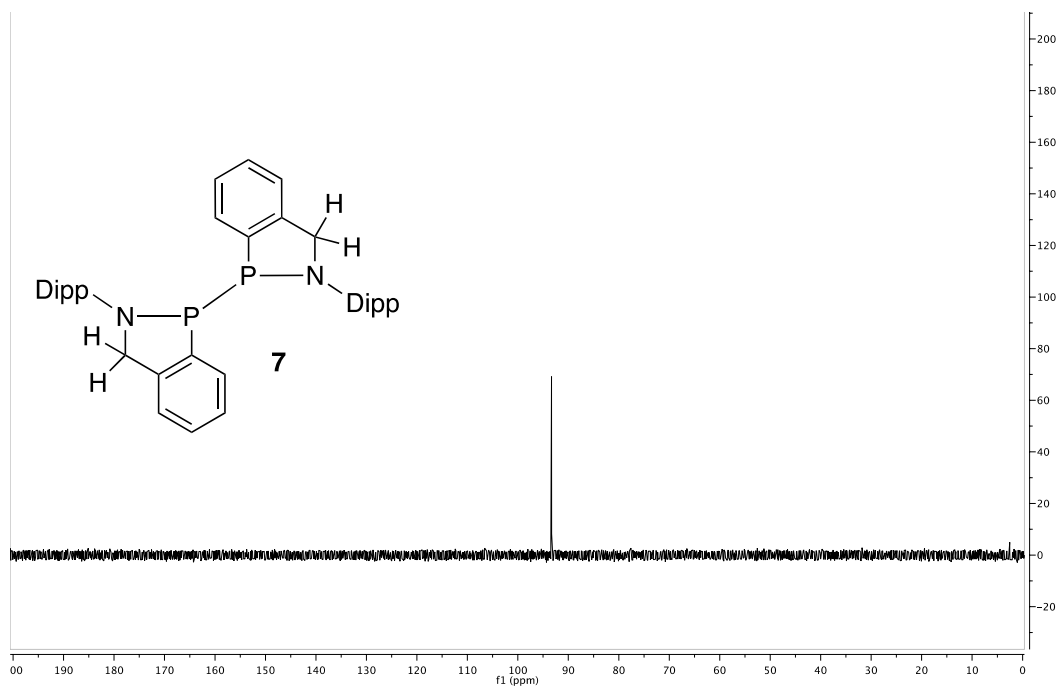

$^1\text{H}$  NMR (500 MHz,  $\text{C}_6\text{D}_6$ )

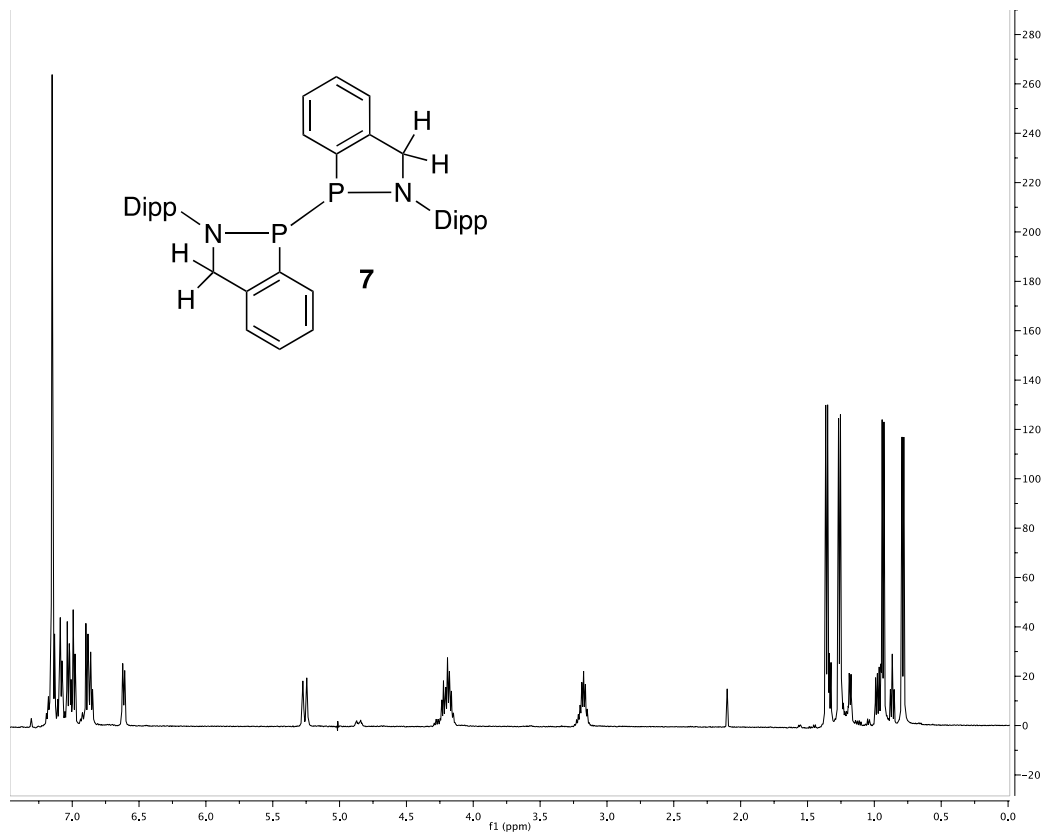

$^{13}\text{C}\{^1\text{H}\}$  NMR (125 MHz,  $\text{C}_6\text{D}_6$ )

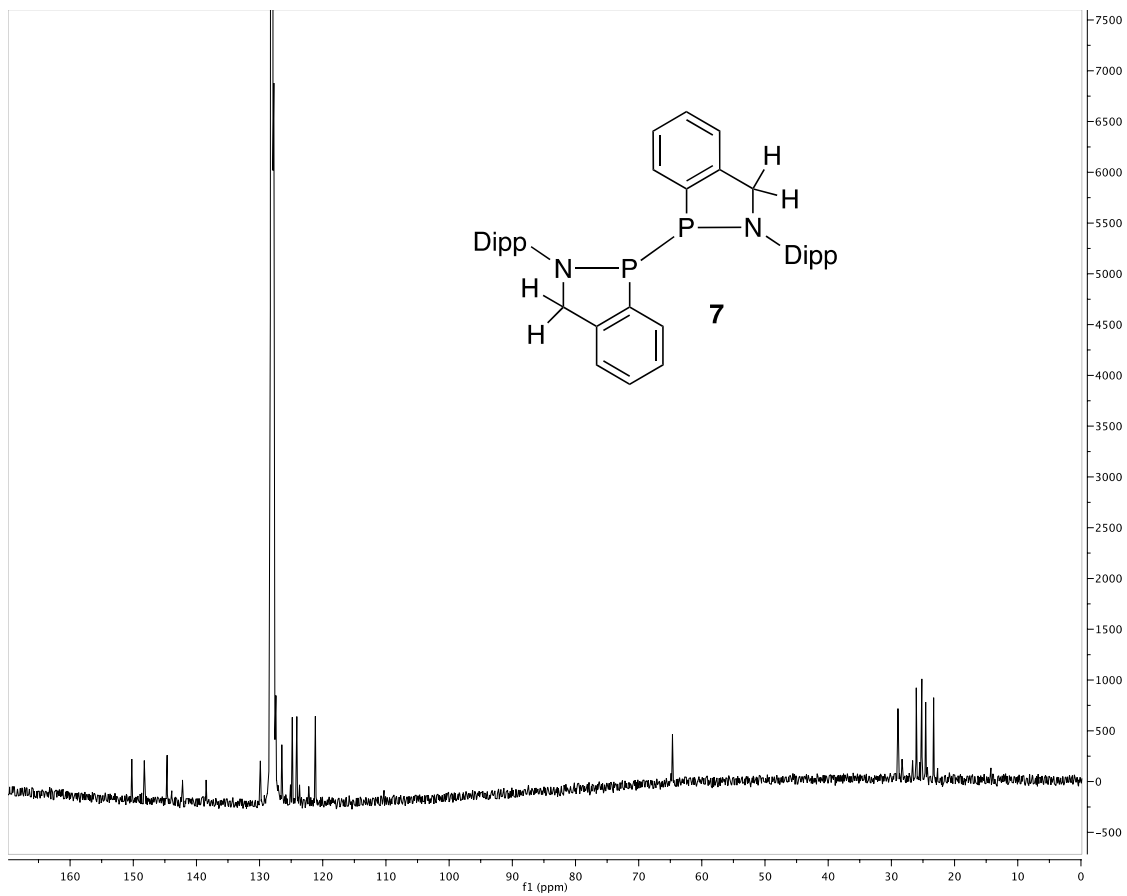

CENTC Elemental Analysis Facility  
University of Rochester  
Rochester, NY 14627 USA  
Email: ealab@chem.rochester.edu

**Date of report** 9/11/2020 2:09:04PM

**User ID** Administrator

**Comments** DZ-78 [ Cain / Zhou ]

|             |                      |         |               |
|-------------|----------------------|---------|---------------|
| DATE & TIME | 9/11/2020 2:01:59 PM | P_ID    | EA LAB        |
| SAMPLE ID   | 20264D               | USER ID | Administrator |
| WEIGHT (mg) | 2.100                | MODE    | CHN           |

|          |         |
|----------|---------|
| CARBON   | 76.957% |
| HYDROGEN | 8.088%  |
| NITROGEN | 4.436%  |

|             |                      |         |               |
|-------------|----------------------|---------|---------------|
| DATE & TIME | 9/11/2020 1:56:54 PM | P_ID    | EA LAB        |
| SAMPLE ID   | 20264                | USER ID | Administrator |
| WEIGHT (mg) | 2.435                | MODE    | CHN           |

|          |         |
|----------|---------|
| CARBON   | 76.696% |
| HYDROGEN | 8.125%  |
| NITROGEN | 4.431%  |

#### Special Handling

The sample was transferred under argon and was combusted in a tin capsule that was crimp-sealed with a die apparatus.

#### Acknowledgment

Analytical data were obtained from the CENTC Elemental Analysis Facility at the University of Rochester, funded by NSF CHE-0650456.

#### Instrumentation

Microanalysis samples were weighed with a PerkinElmer Model AD6000 Autobalance and their compositions were determined with a PerkinElmer 2400 Series II Analyzer. Air-sensitive samples were handled in a VAC Atmospheres glovebox.

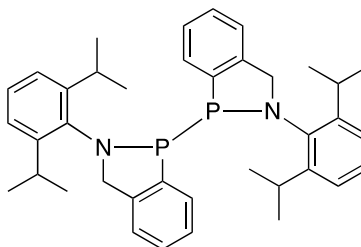

Chemical Formula:  $C_{38}H_{46}N_2P_2$

Exact Mass: 592.3136

Molecular Weight: 592.7475

m/z: 592.3136 (100.0%), 593.3170 (41.1%), 594.3203 (8.2%)

Elemental Analysis: C, 77.00; H, 7.82; N, 4.73; P, 10.45

## 2. Stoichiometric and Catalytic Studies

### Stoichiometric –CCPh Transfer

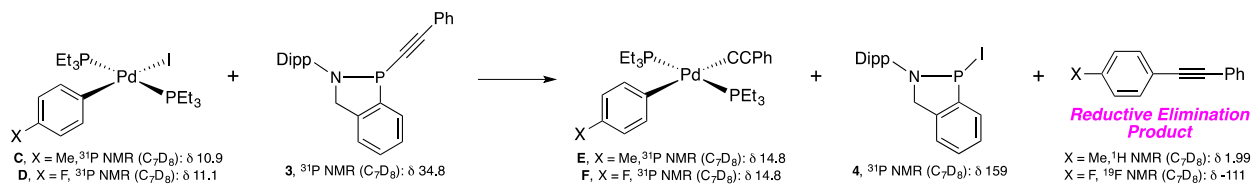

**General Experimental Details:** Alkynyl-functionalized benzazaphosphole **3** (25 mg, 0.063 mmol) was dissolved in approximately 1.5 ml of  $\text{C}_7\text{D}_8$  and added to Pd complex **C** or **D** (35 mg, 0.063 mol). The reaction mixture was transferred to a J-Young tube and placed in an oil bath at 120 °C. The reaction was monitored by  $^1\text{H}$  and  $^{31}\text{P}\{\text{H}\}$  for **C** and  $^{31}\text{P}\{\text{H}\}$  and  $^{19}\text{F}$  NMR spectroscopy for **D** in 12 h intervals until >95% conversion was reached.

## Stoichiometric Studies $\rightarrow$ C + 3 ( $^{31}\text{P}$ Tracking)

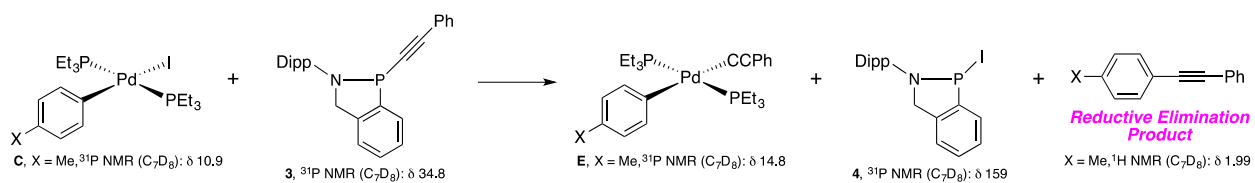

$^{31}\text{P}\{^1\text{H}\}$  NMR (121 MHz,  $\text{C}_7\text{D}_8$ )

**t = 0, no heat applied**

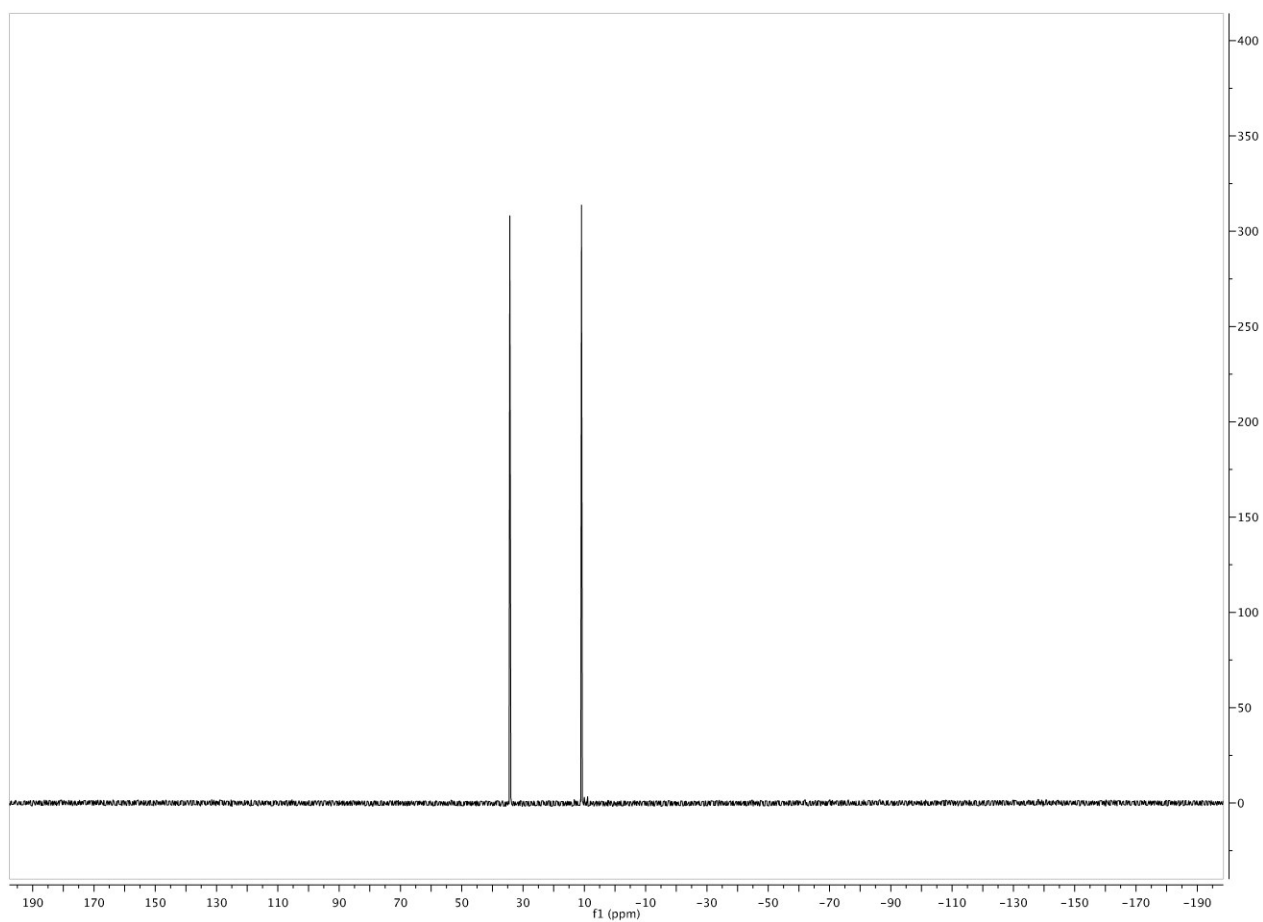

$^{31}\text{P}\{^1\text{H}\}$  NMR (121 MHz,  $\text{C}_7\text{D}_8$ )

$t = 12 \text{ h}, 120 \text{ }^\circ\text{C}$

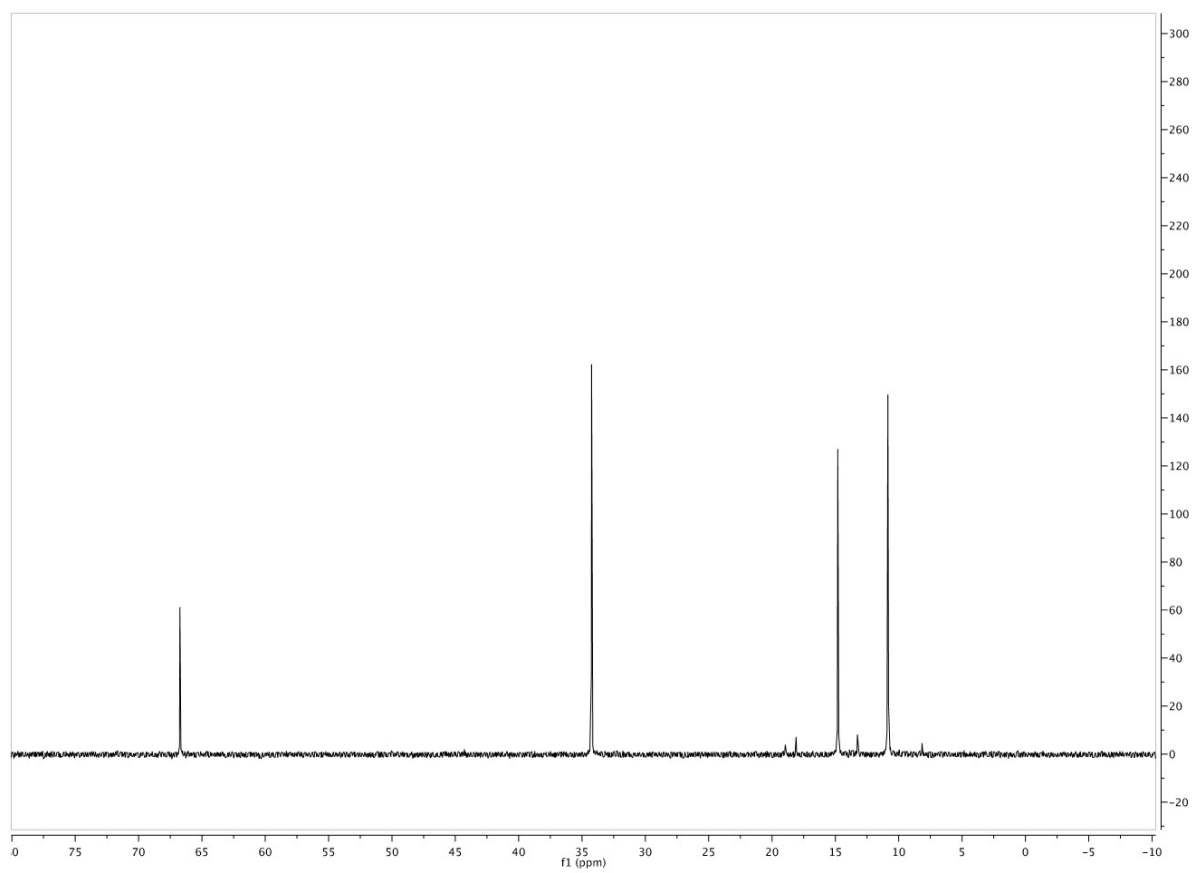

$^{31}\text{P}\{^1\text{H}\}$  NMR (121 MHz,  $\text{C}_7\text{D}_8$ )

$t = 24 \text{ h}, 120 \text{ }^\circ\text{C}$

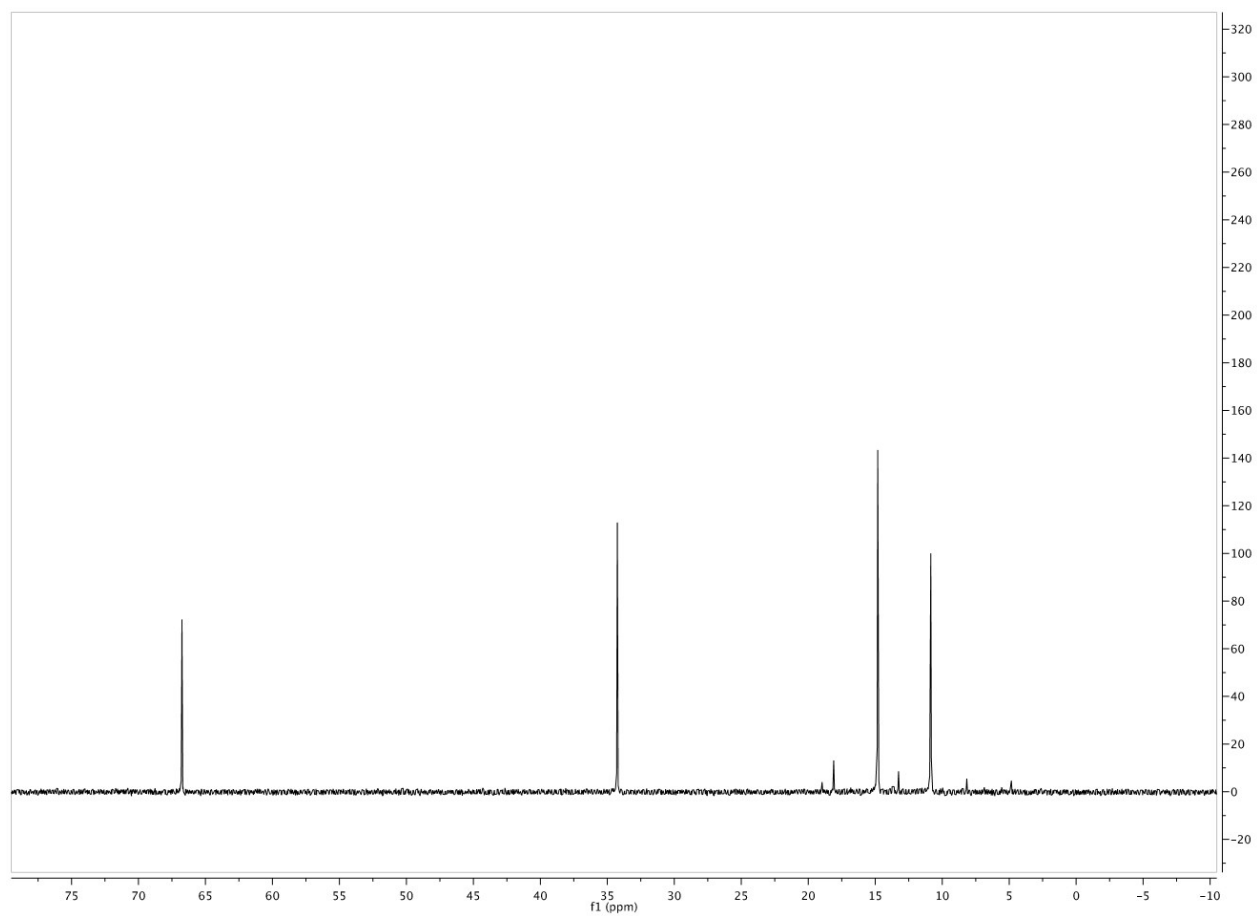



$^3\text{P}\{^1\text{H}\}$  NMR (121 MHz,  $\text{C}_7\text{D}_8$ )

$t = 36 \text{ h}, 120 \text{ }^\circ\text{C}$

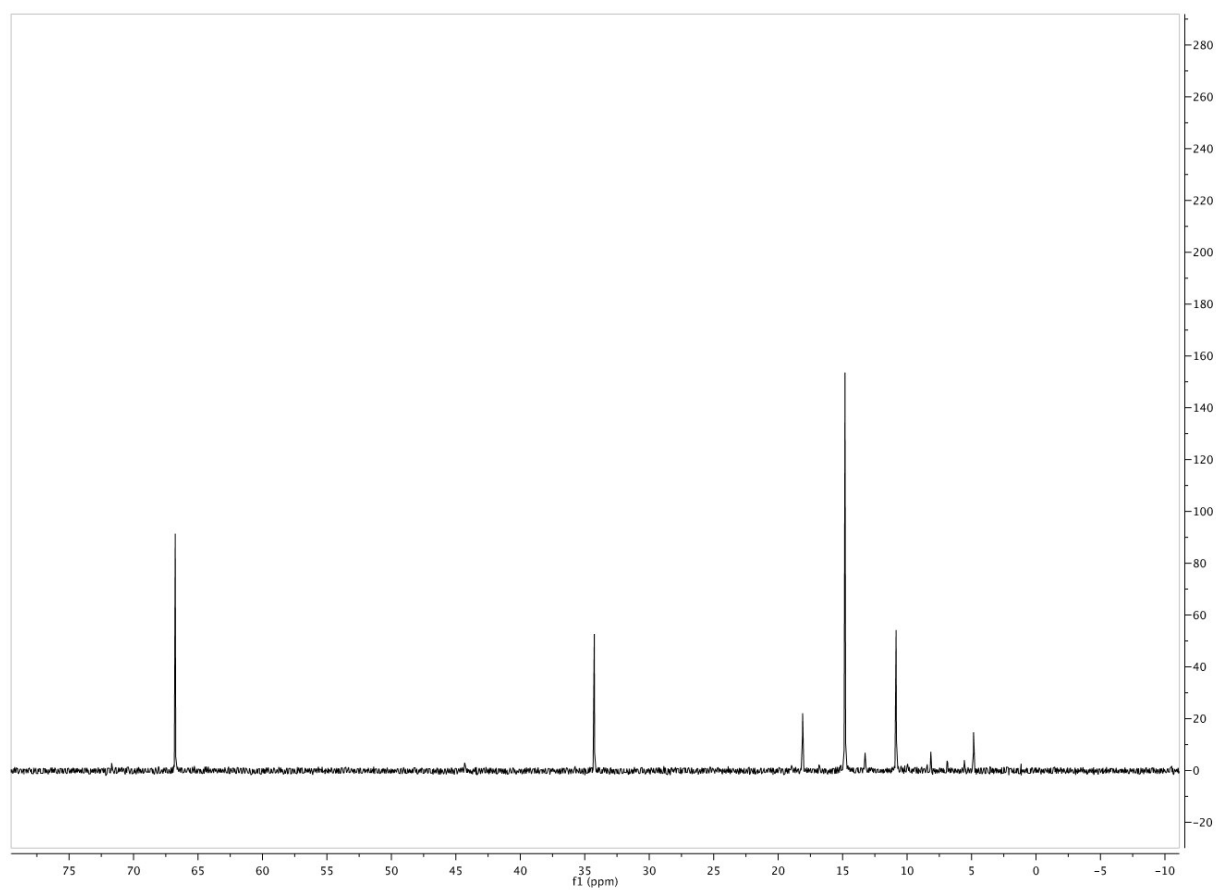

$^{31}\text{P}\{^1\text{H}\}$  NMR (121 MHz,  $\text{C}_7\text{D}_8$ )

$t = 48 \text{ h}, 120^\circ\text{C}$

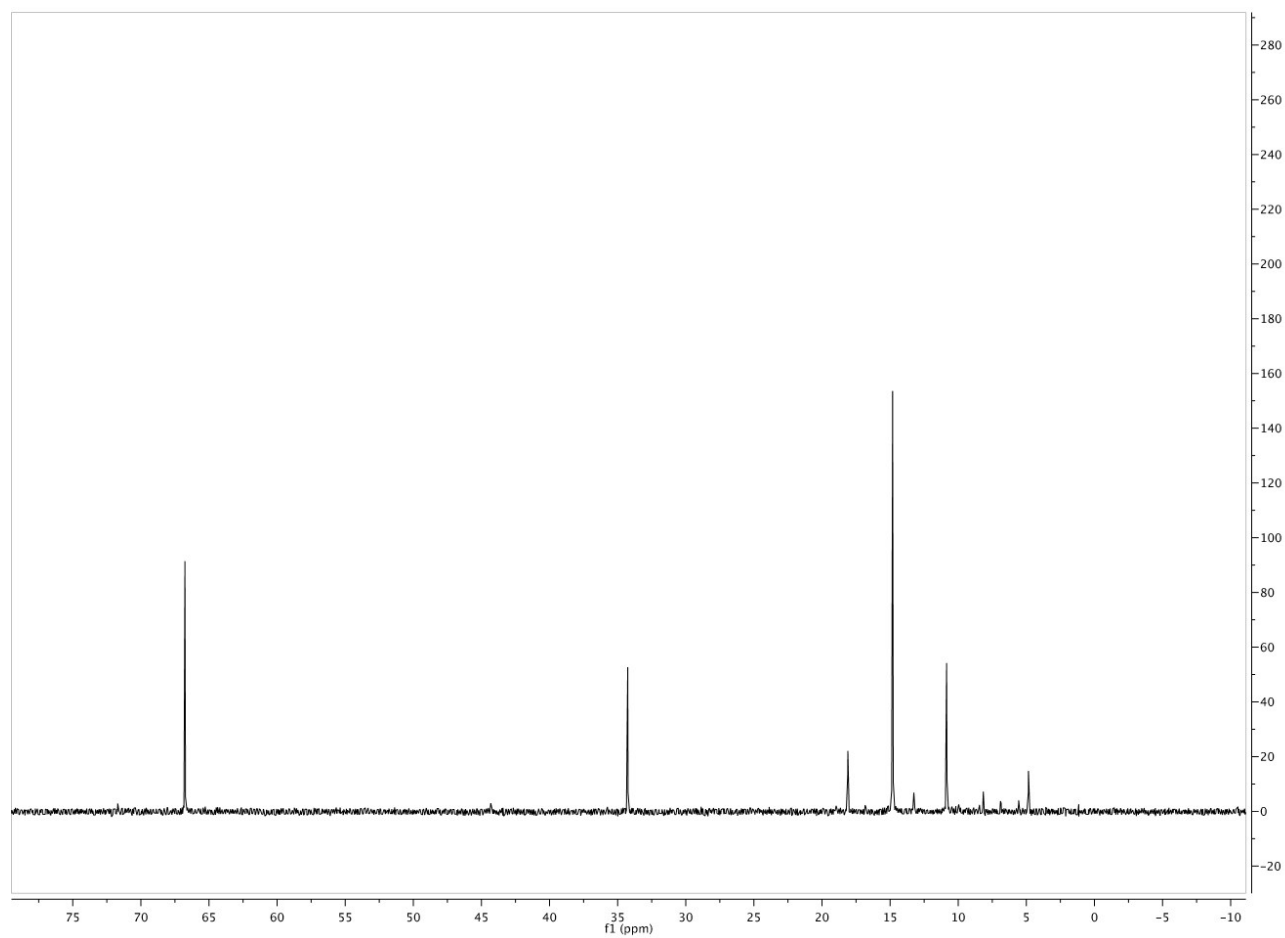

$^{31}\text{P}\{^1\text{H}\}$  NMR (121 MHz,  $\text{C}_7\text{D}_8$ )

$t = 60 \text{ h}, 120 \text{ }^\circ\text{C}$

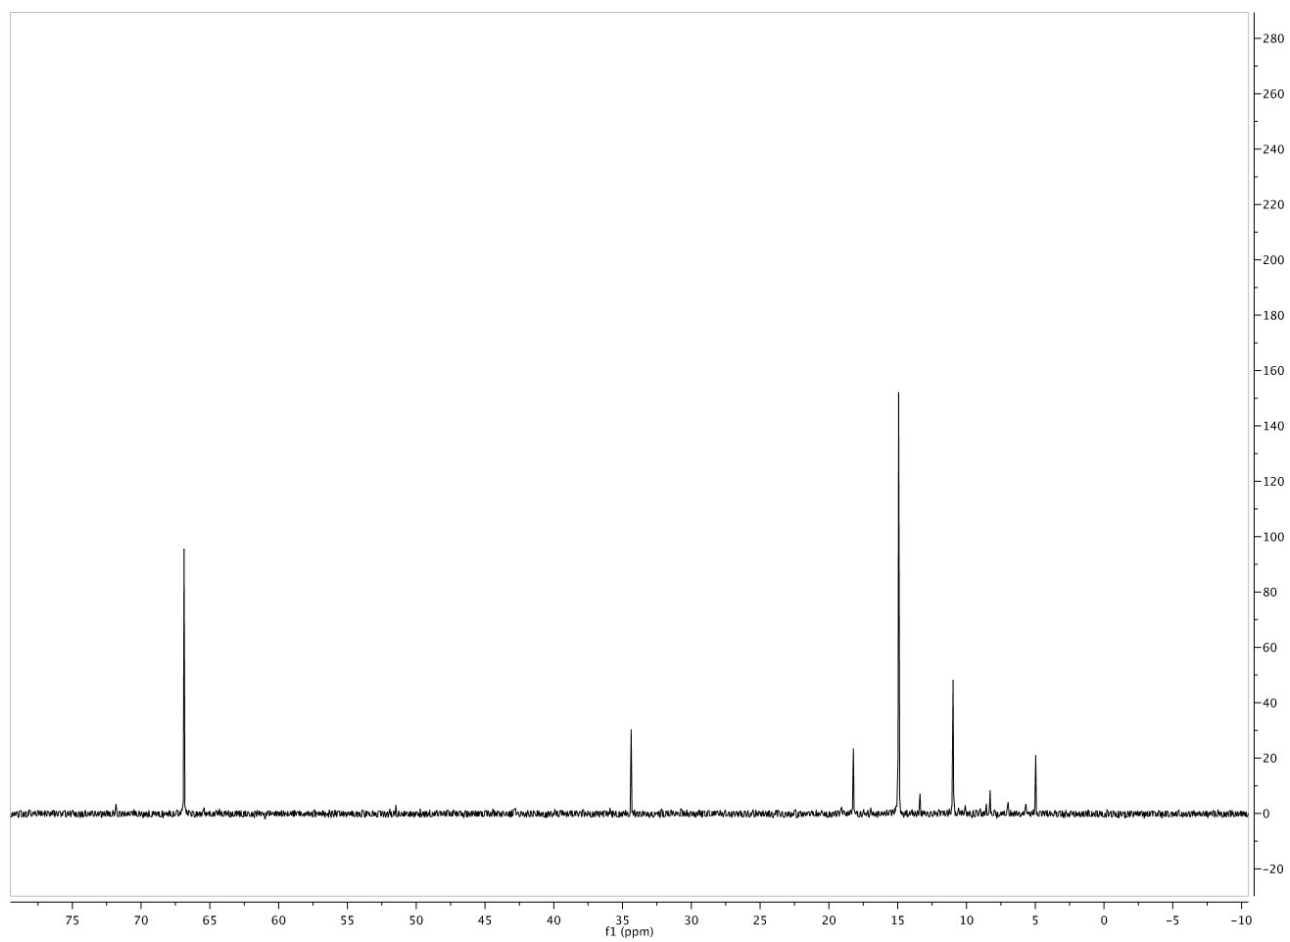

$^{31}\text{P}\{^1\text{H}\}$  NMR (121 MHz,  $\text{C}_7\text{D}_8$ )

$t = 72 \text{ h}, 120 \text{ }^\circ\text{C}$

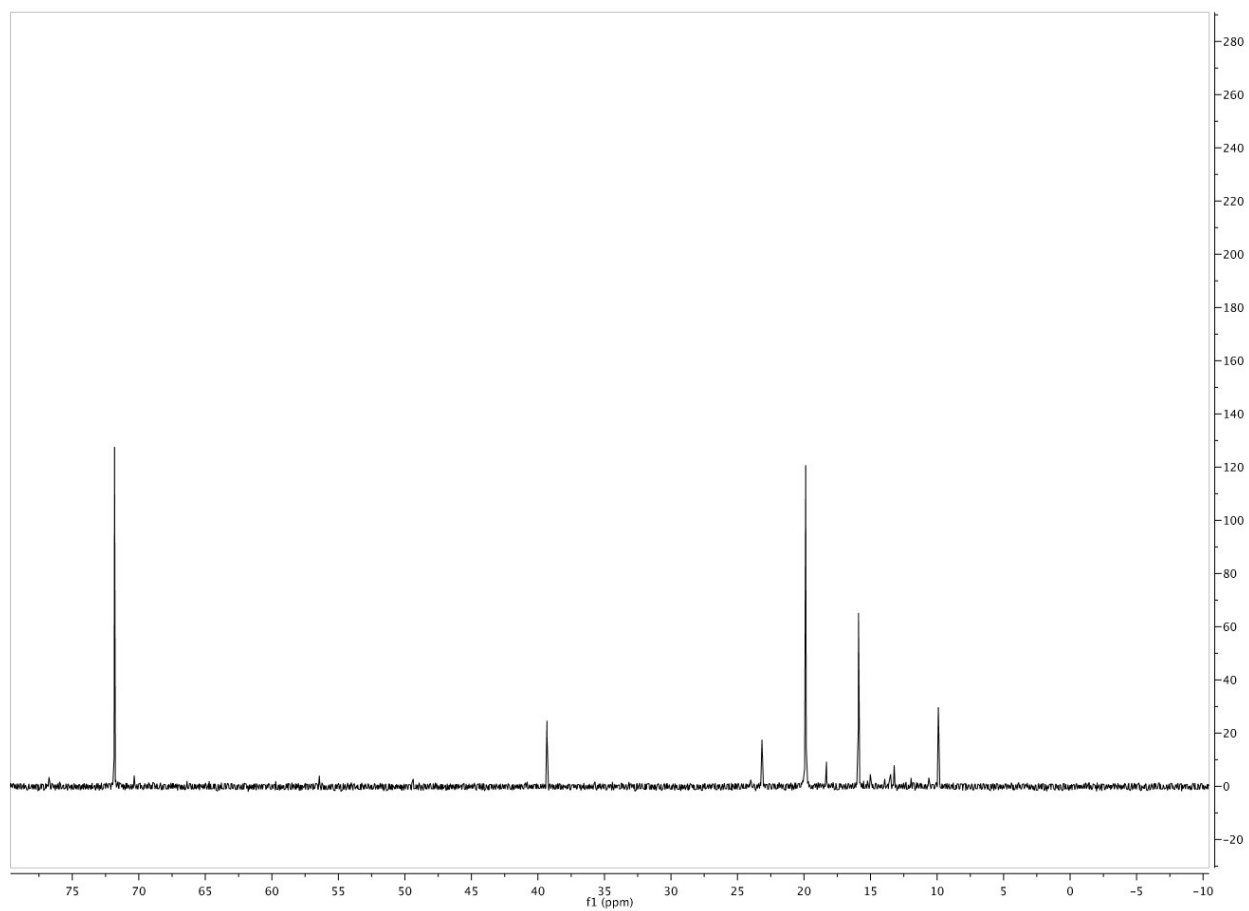

$^{31}\text{P}\{^1\text{H}\}$  NMR (121 MHz,  $\text{C}_7\text{D}_8$ )

$t = 84 \text{ h}, 120 \text{ }^\circ\text{C}$

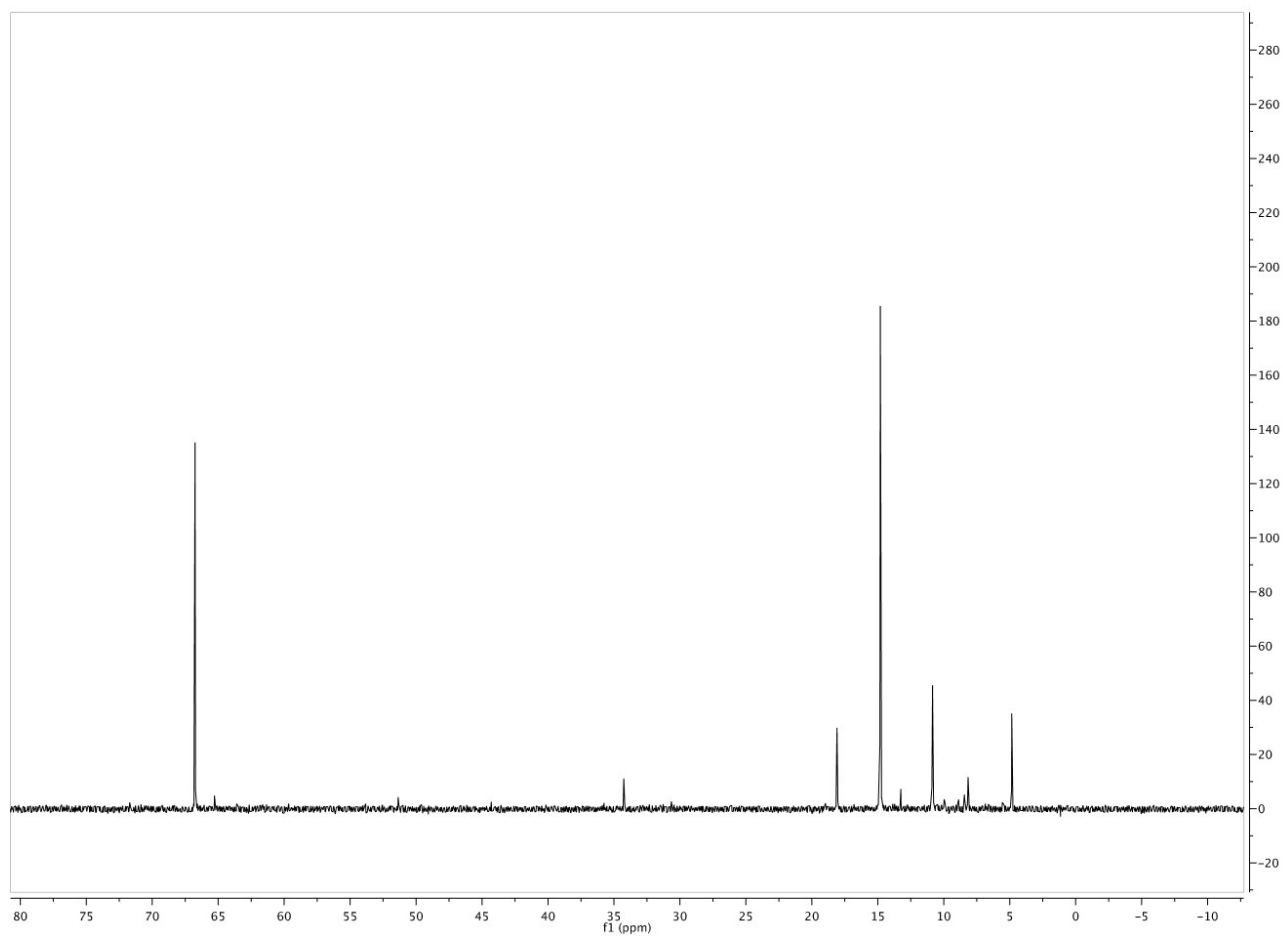

$^{31}\text{P}\{^1\text{H}\}$  NMR (121 MHz,  $\text{C}_7\text{D}_8$ )

$t = 96 \text{ h}, 120 \text{ }^\circ\text{C}$

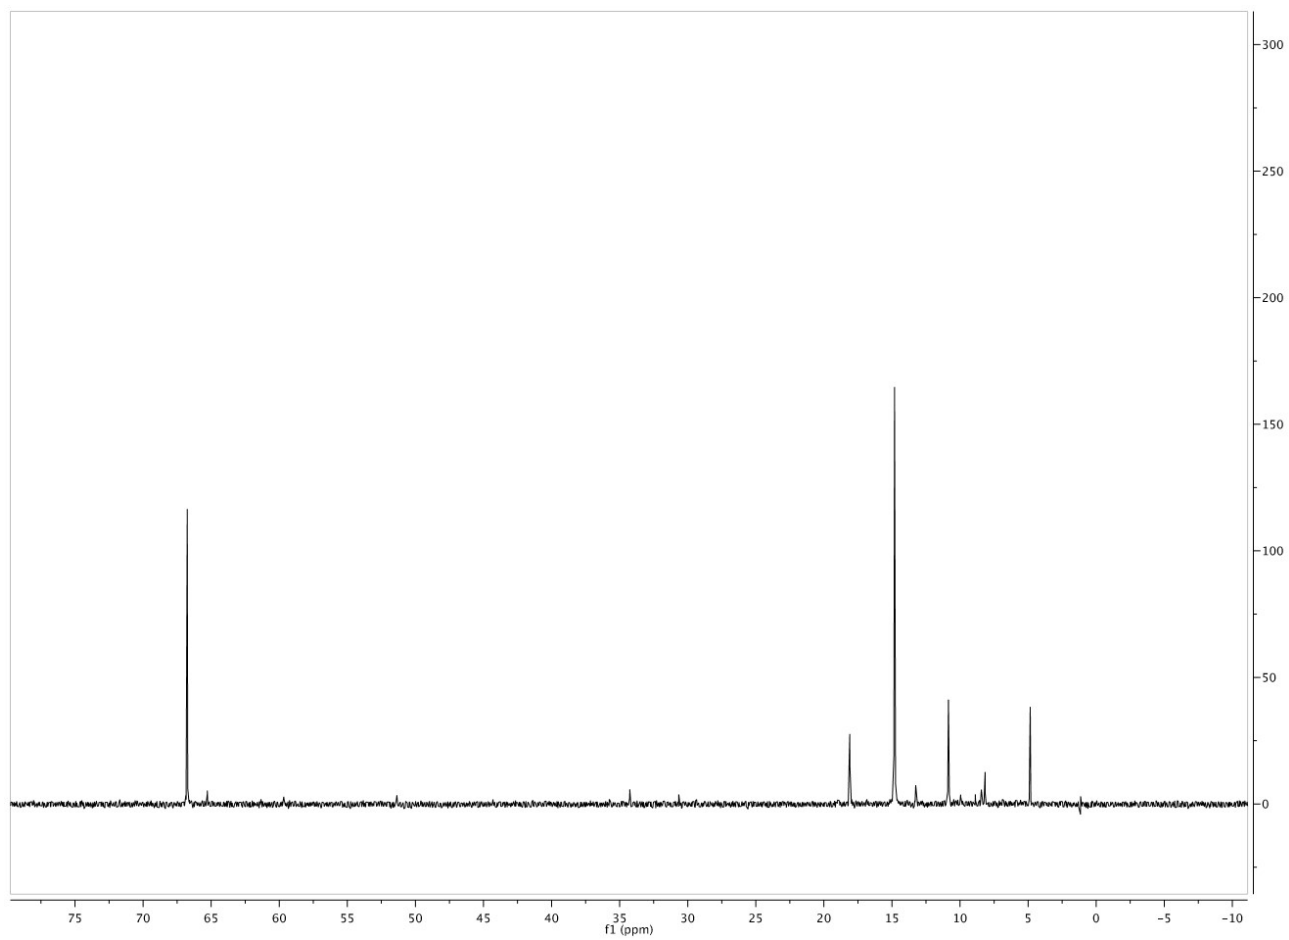

$^{31}\text{P}\{^1\text{H}\}$  NMR (121 MHz,  $\text{C}_7\text{D}_8$ )

$t = 108 \text{ h}, 120 \text{ }^\circ\text{C}$

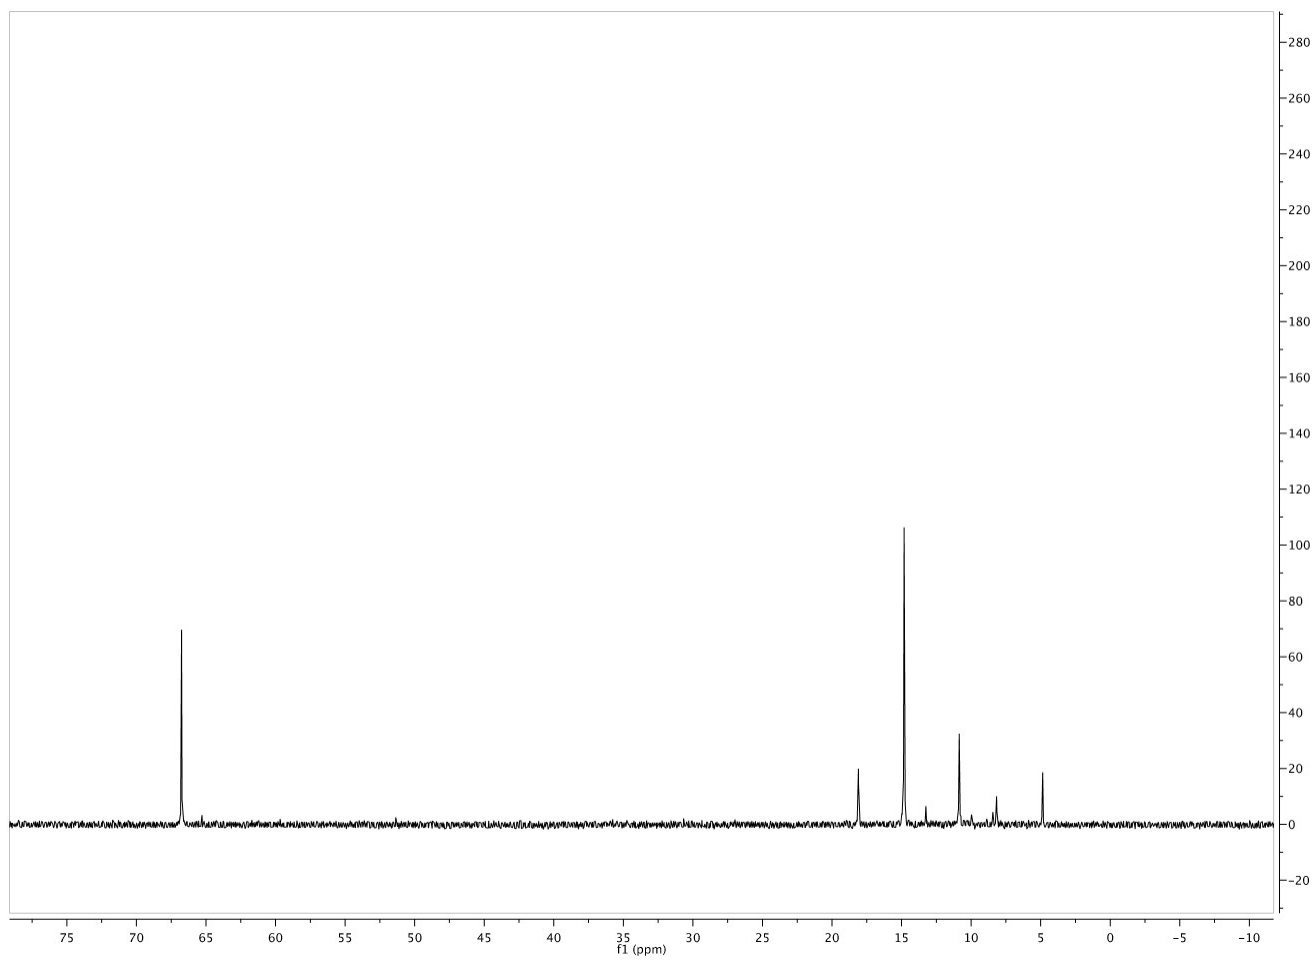

Stoichiometric Studies  $\rightarrow$  D + 3 ( $^{31}\text{P}$  and  $^{19}\text{F}$  Tracking)

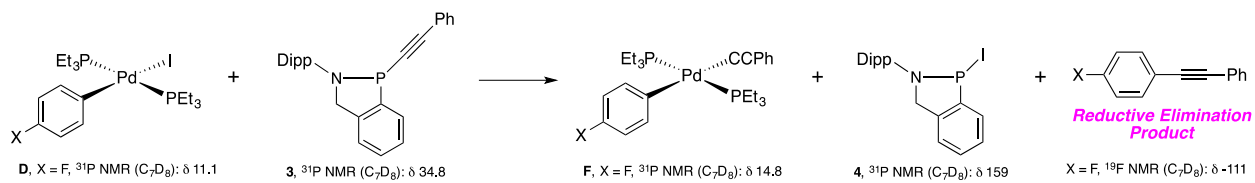

$^{31}\text{P}\{^1\text{H}\}$  NMR (121 MHz,  $\text{C}_7\text{D}_8$ )

$t = 0$  h, no heat applied

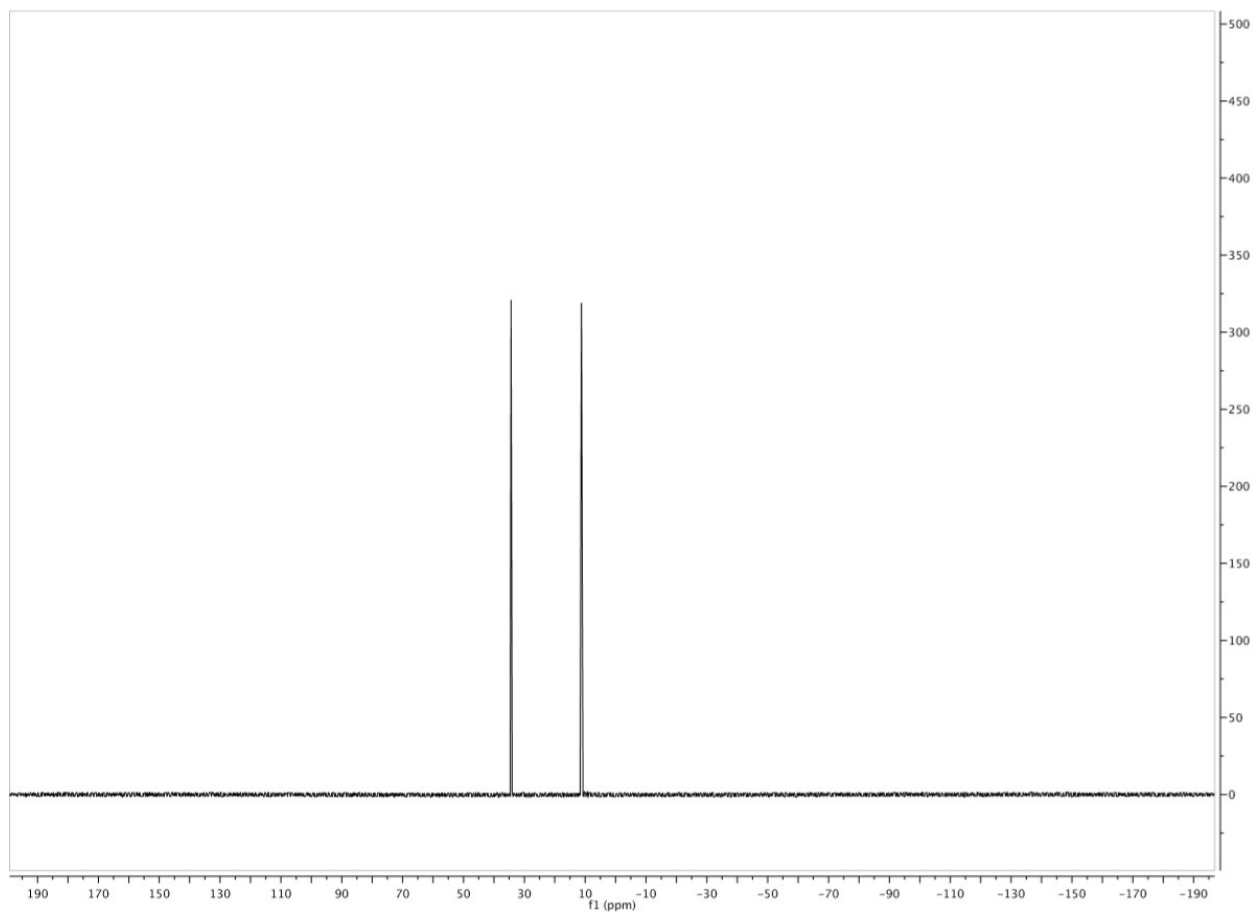



$^{19}\text{F}\{^1\text{H}\}$  NMR (282 MHz,  $\text{C}_7\text{D}_8$ )

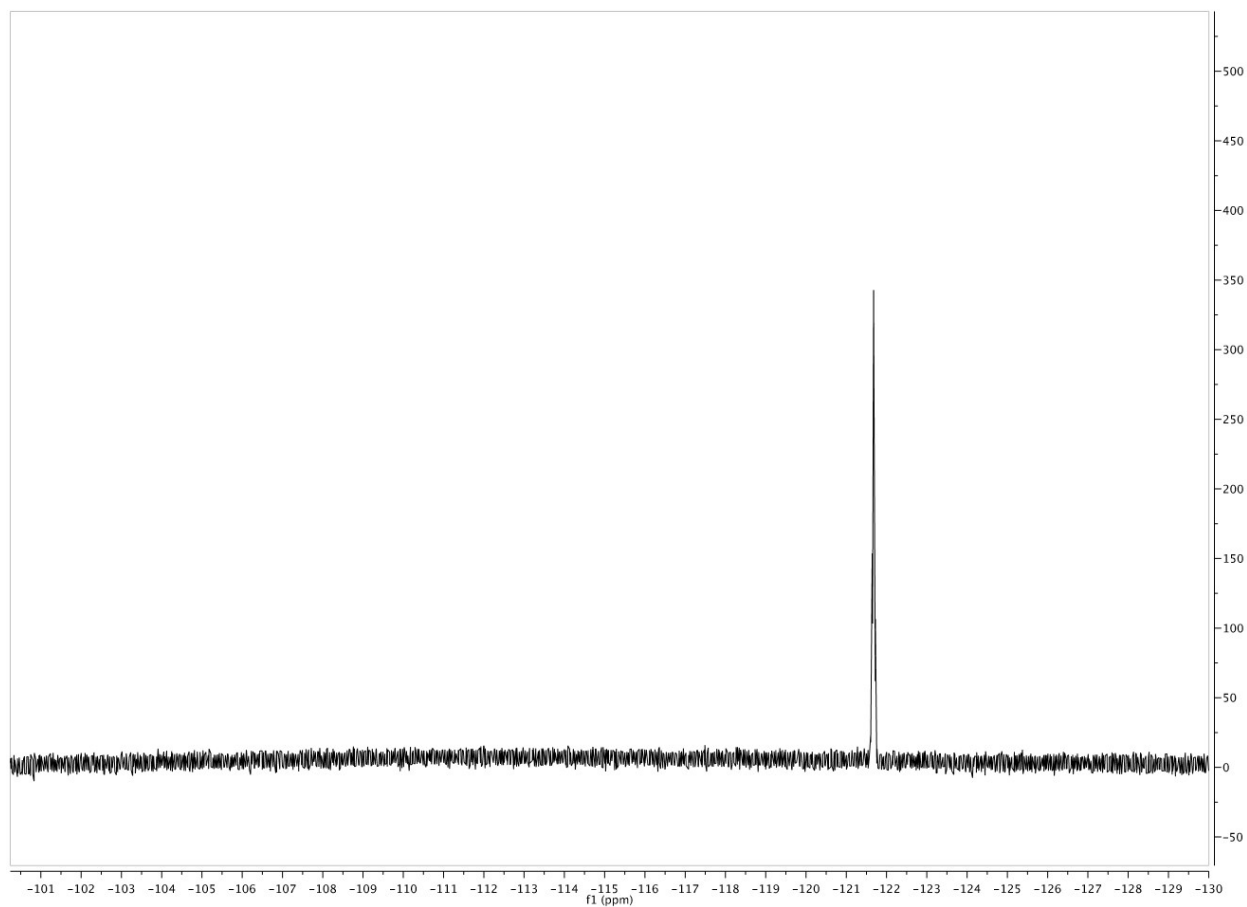

$^{31}\text{P}\{^1\text{H}\}$  NMR (121 MHz,  $\text{C}_7\text{D}_8$ )

$t = 12 \text{ h}, 120 \text{ }^\circ\text{C}$

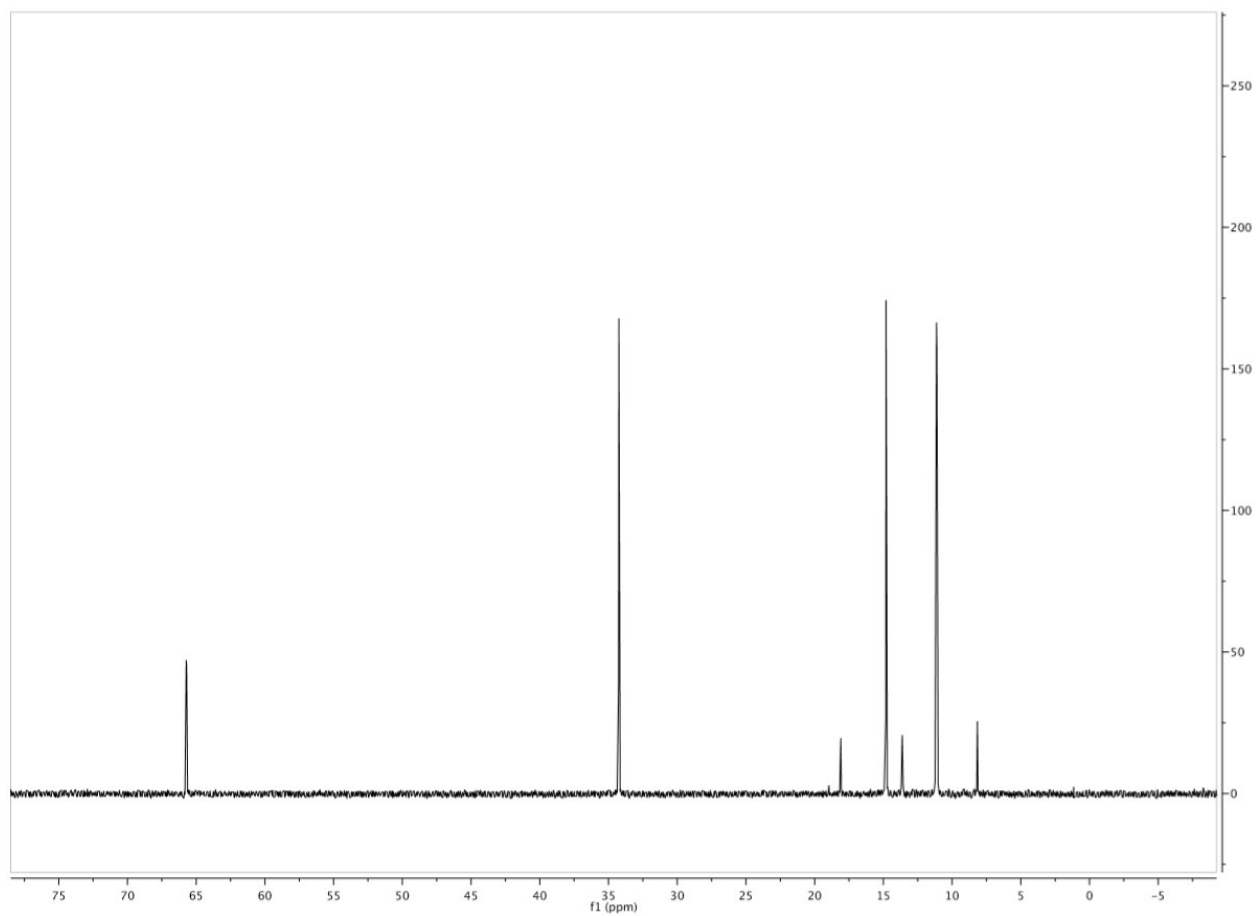

$^{19}\text{F}\{^1\text{H}\}$  NMR (282 MHz,  $\text{C}_7\text{D}_8$ )

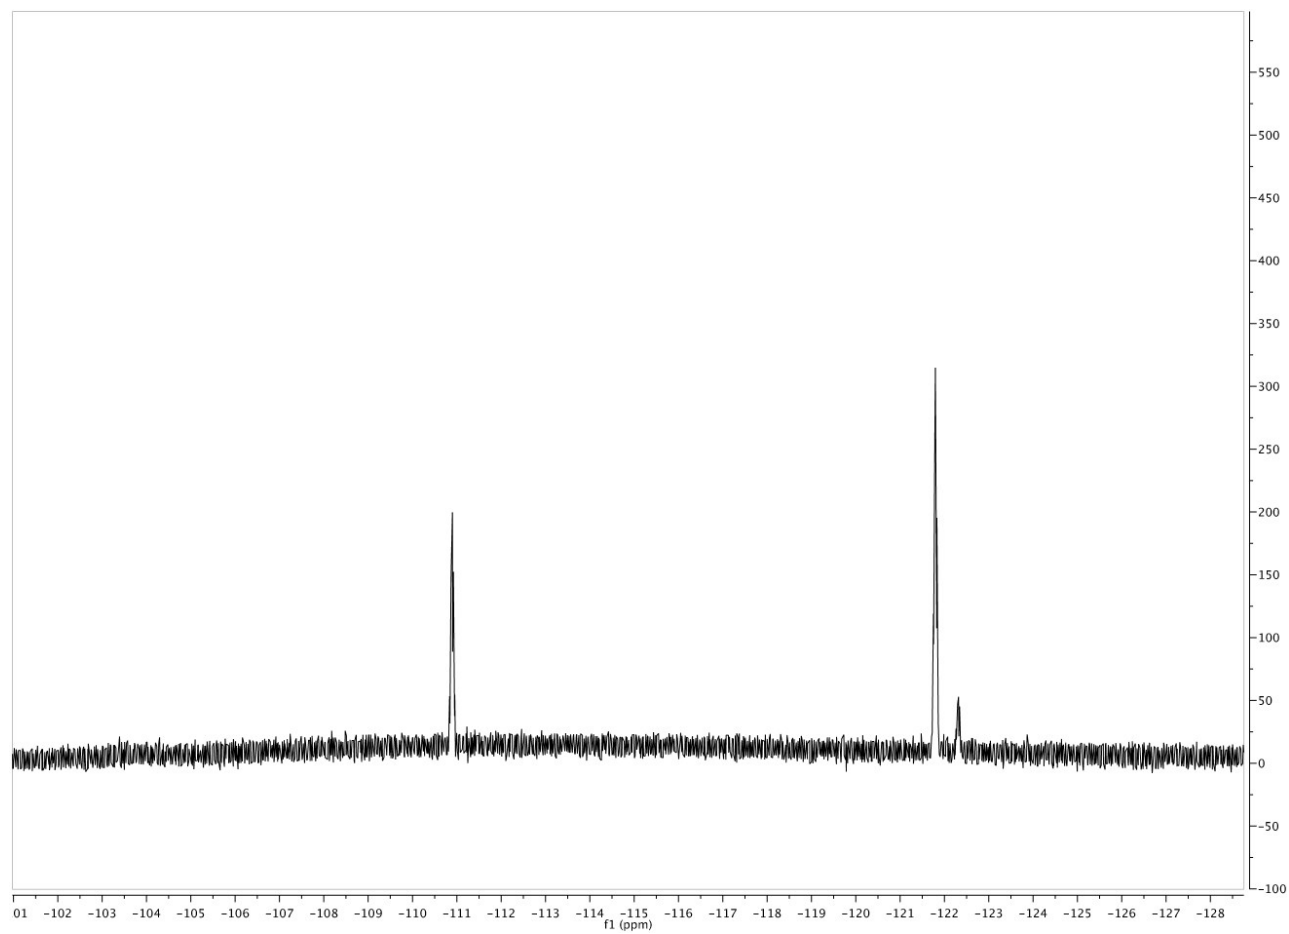

$^{31}\text{P}\{^1\text{H}\}$  NMR (121 MHz,  $\text{C}_7\text{D}_8$ )

$t = 24 \text{ h}, 120^\circ\text{C}$

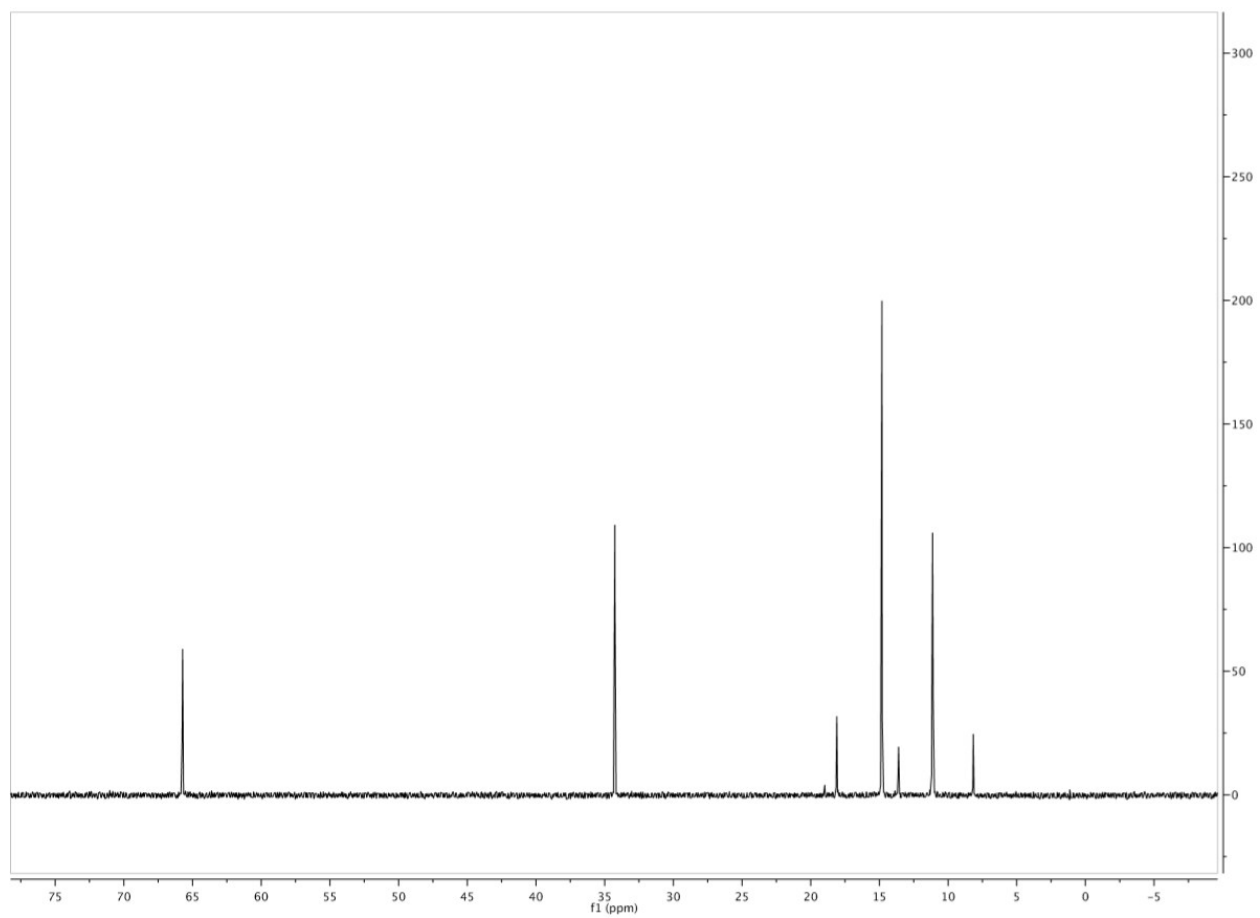

$^{19}\text{F}\{^1\text{H}\}$  NMR (282 MHz,  $\text{C}_7\text{D}_8$ )

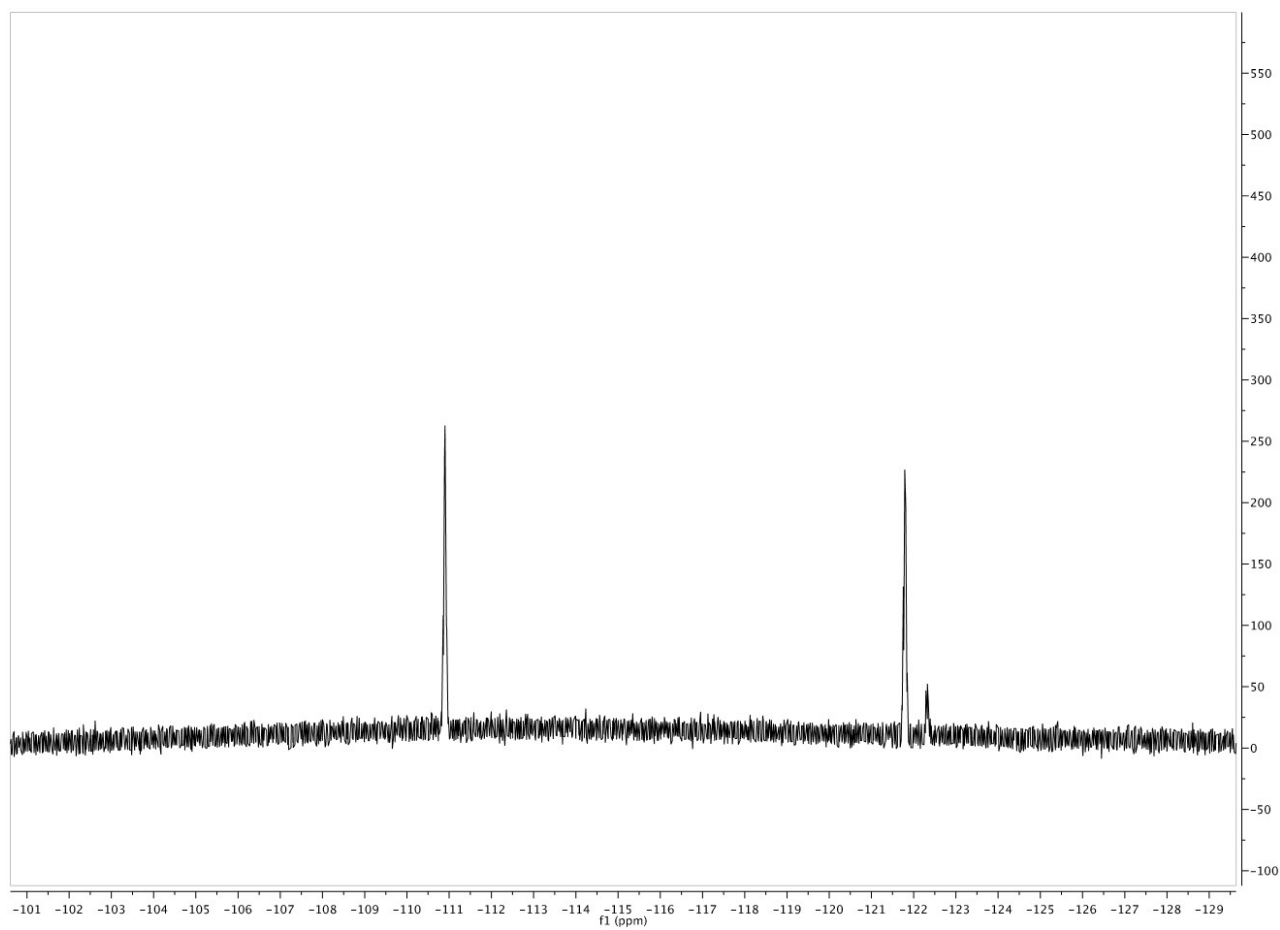

$^{31}\text{P}\{^1\text{H}\}$  NMR (121 MHz,  $\text{C}_7\text{D}_8$ )

$t = 36 \text{ h}, 120 \text{ }^\circ\text{C}$

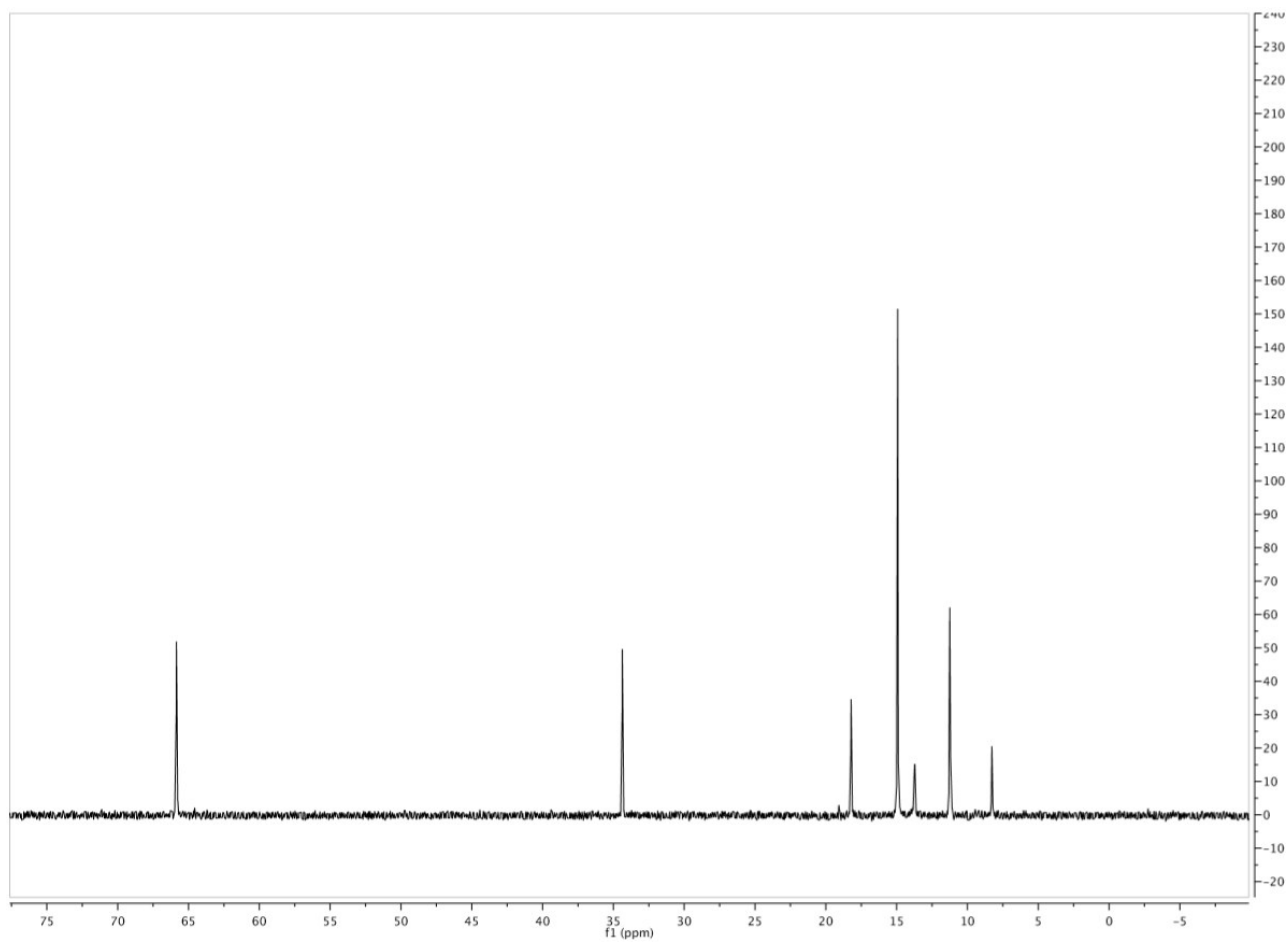

$^{19}\text{F}\{^1\text{H}\}$  NMR (282 MHz,  $\text{C}_7\text{D}_8$ )

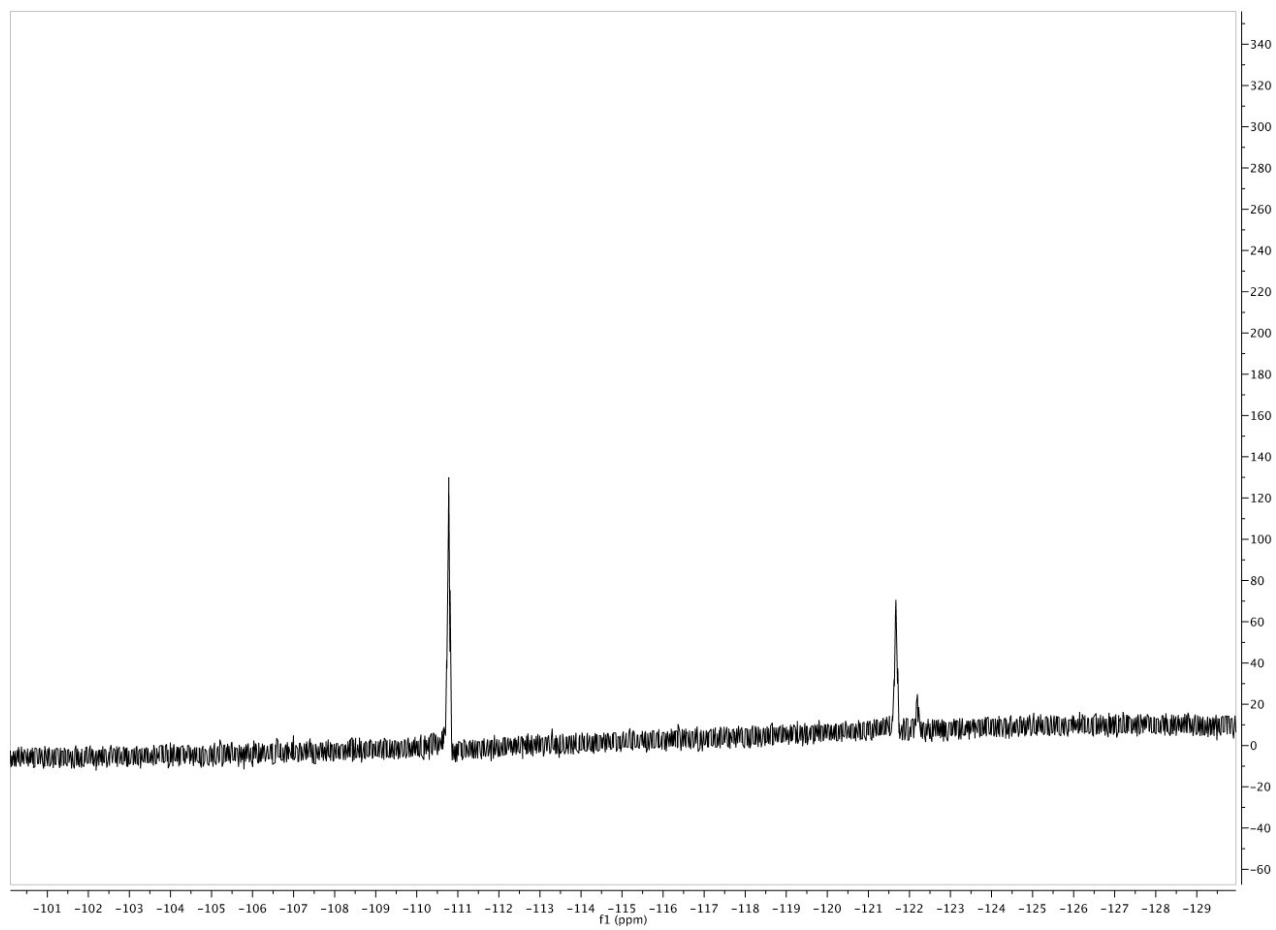

$^{31}\text{P}\{^1\text{H}\}$  NMR (121 MHz,  $\text{C}_7\text{D}_8$ )

$t = 48 \text{ h}, 120^\circ\text{C}$

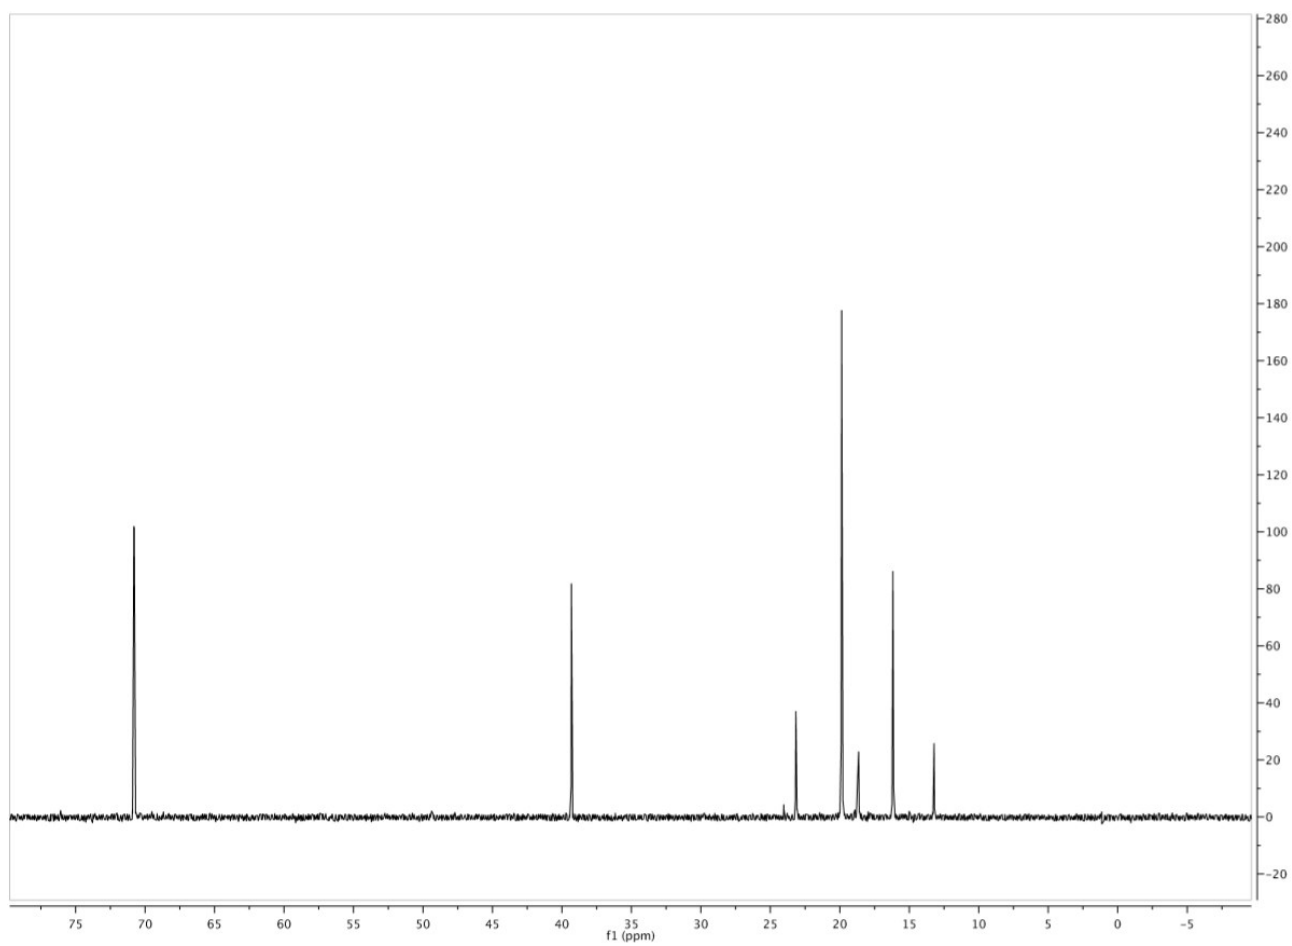



$^{19}\text{F}\{^1\text{H}\}$  NMR (282 MHz,  $\text{C}_7\text{D}_8$ )

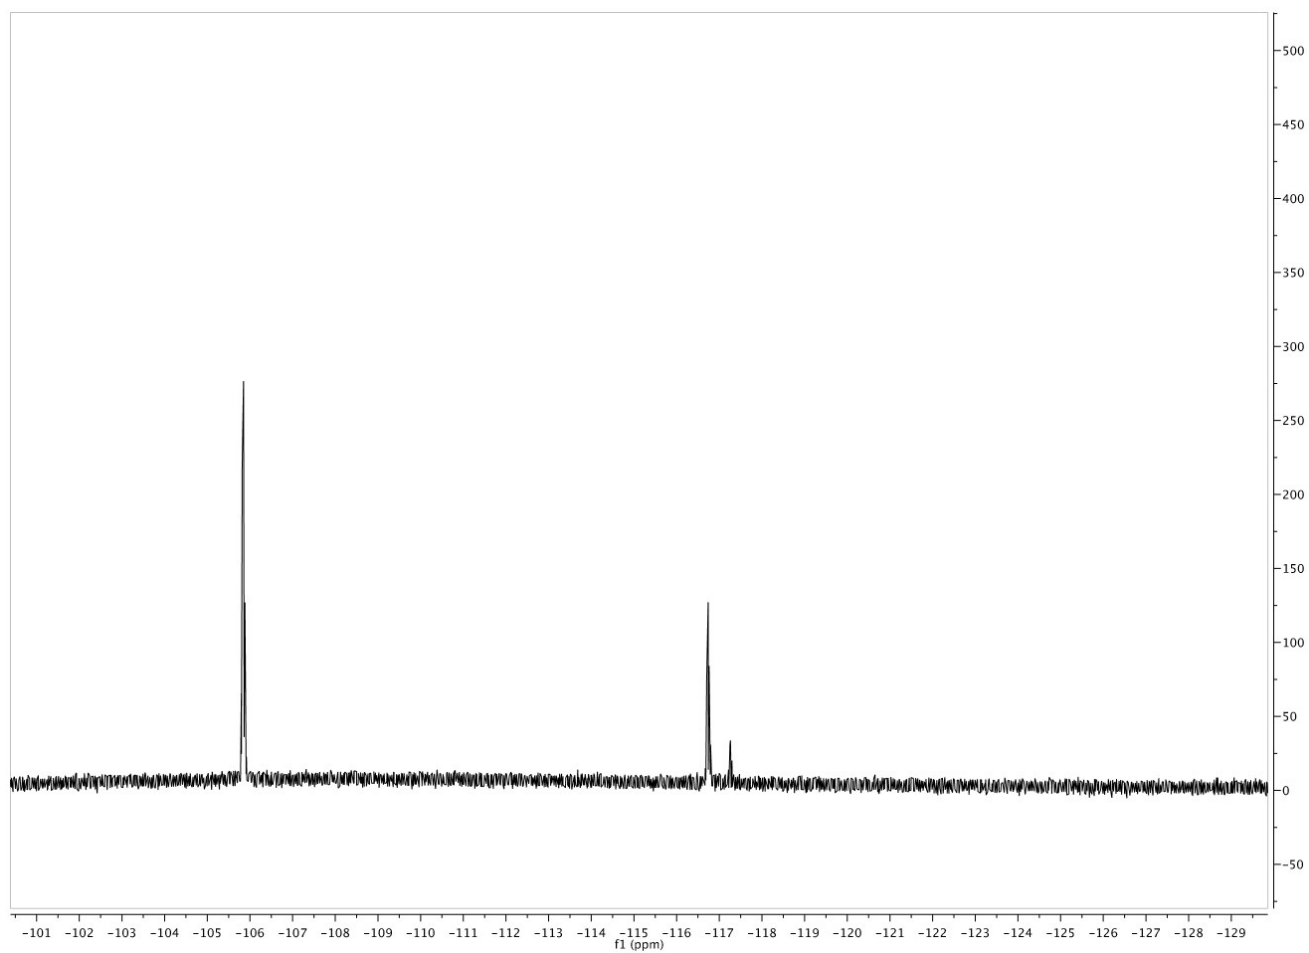

$^{31}\text{P}\{^1\text{H}\}$  NMR (121 MHz,  $\text{C}_7\text{D}_8$ )

$t = 60 \text{ h}, 120 \text{ }^\circ\text{C}$

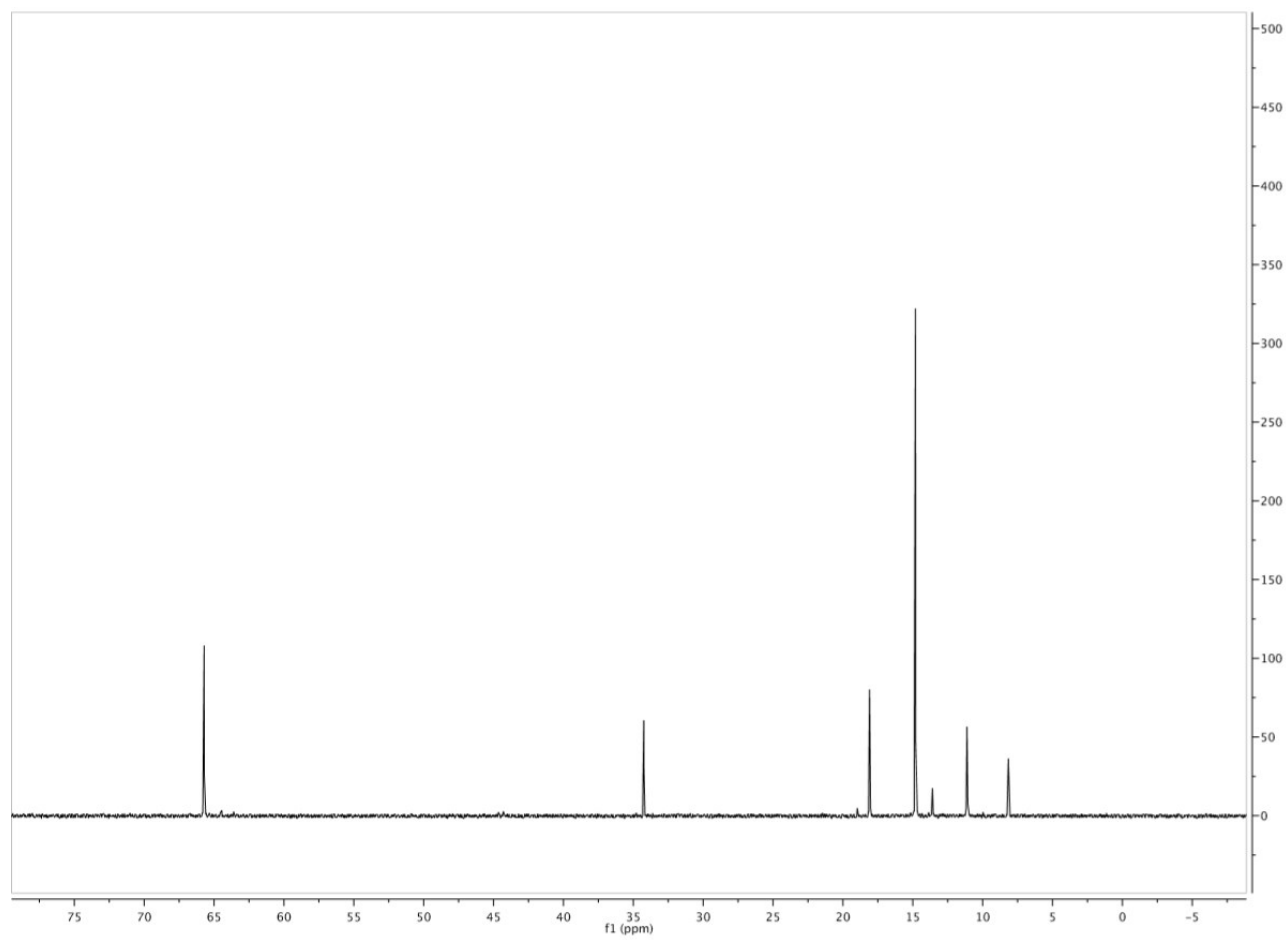

$^{19}\text{F}\{^1\text{H}\}$  NMR (282 MHz,  $\text{C}_7\text{D}_8$ )

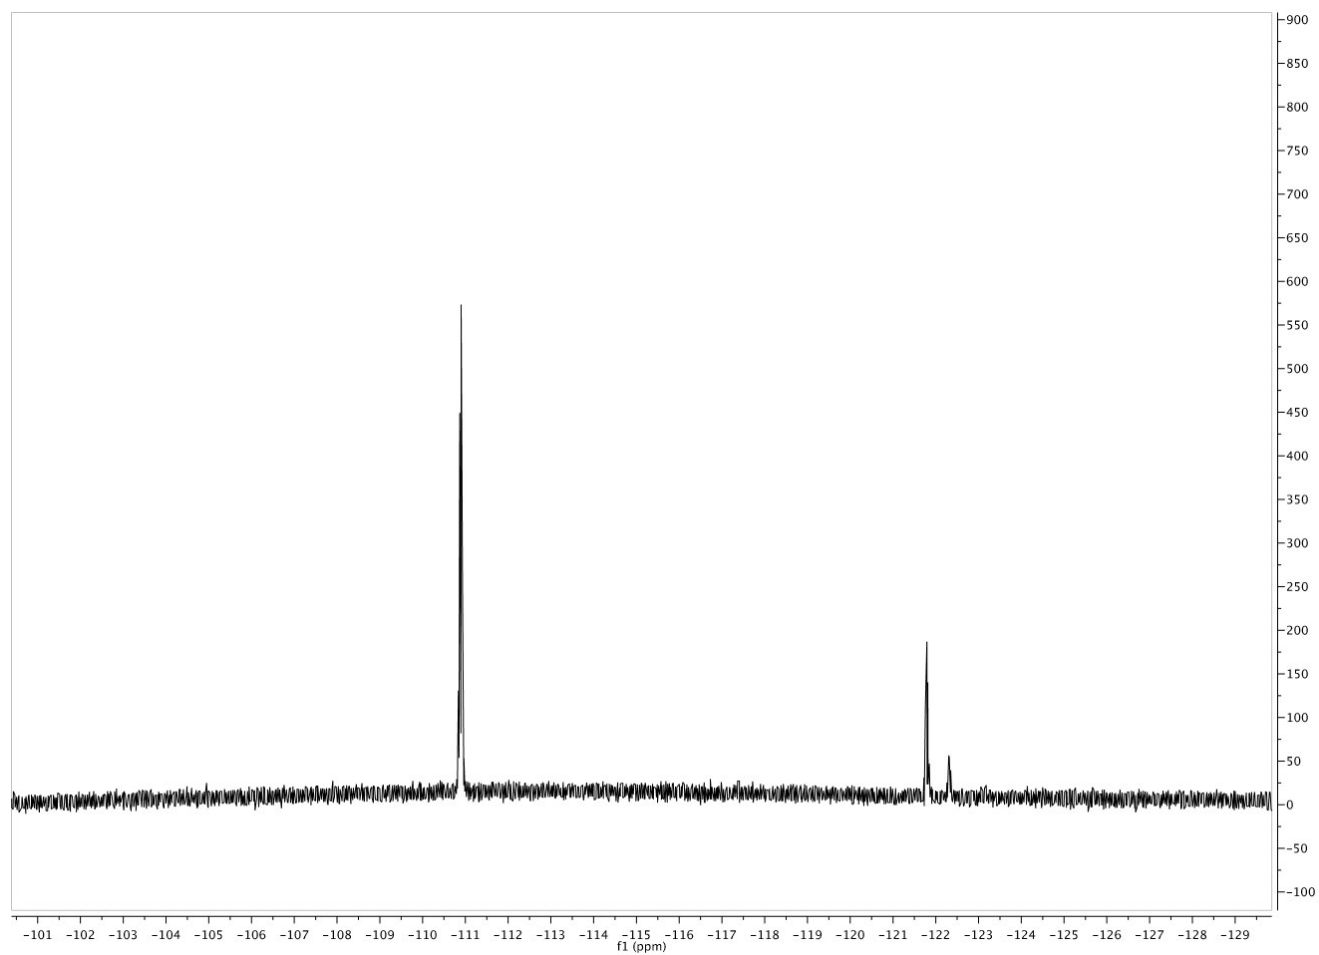

$^{31}\text{P}\{^1\text{H}\}$  NMR (121 MHz,  $\text{C}_7\text{D}_8$ )

$t = 72 \text{ h}, 120 \text{ }^\circ\text{C}$

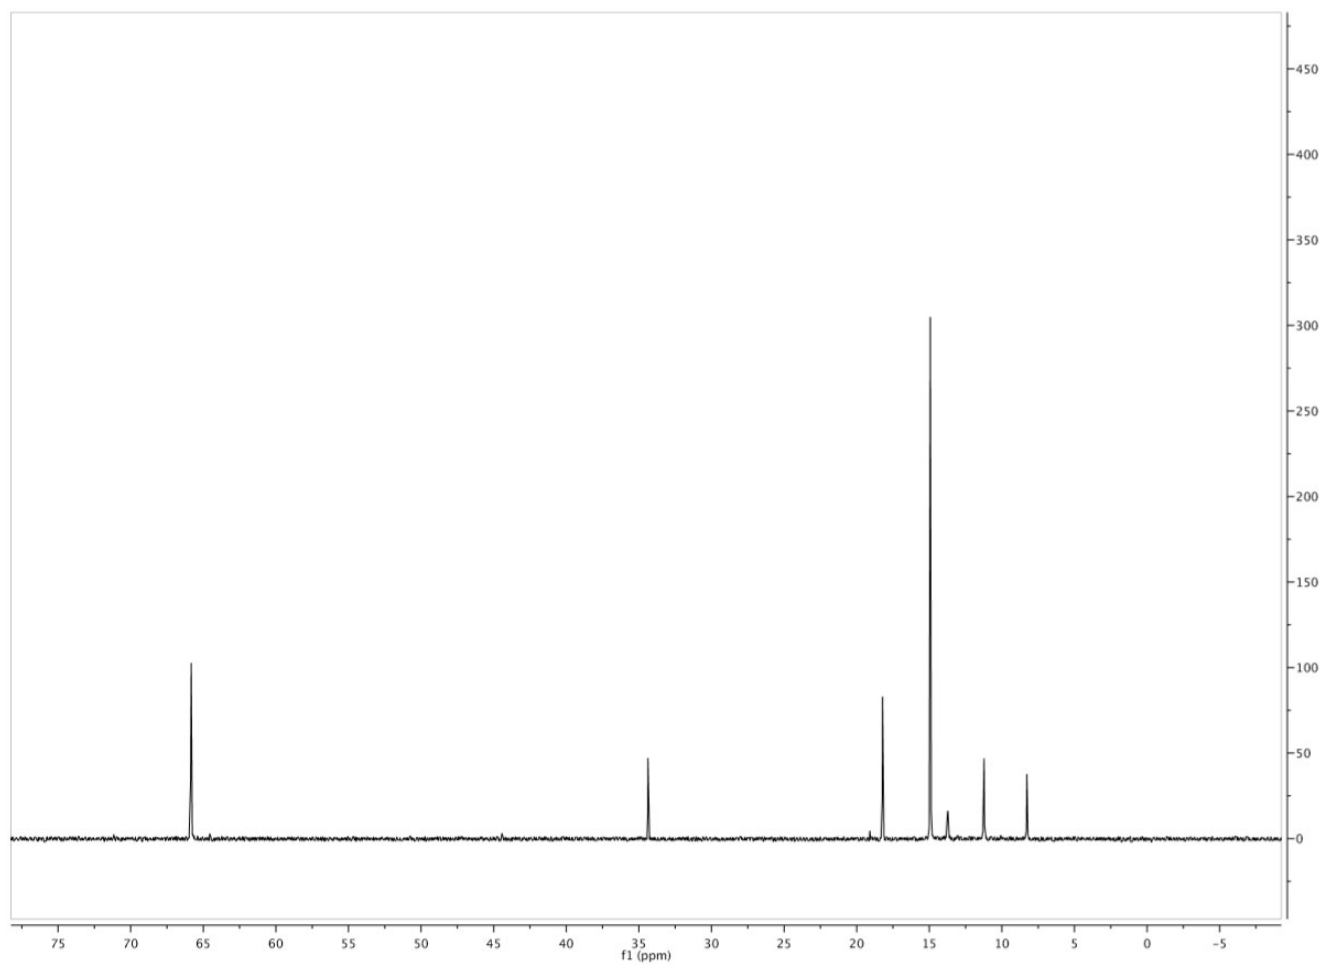

$^{19}\text{F}\{^1\text{H}\}$  NMR (282 MHz,  $\text{C}_7\text{D}_8$ )

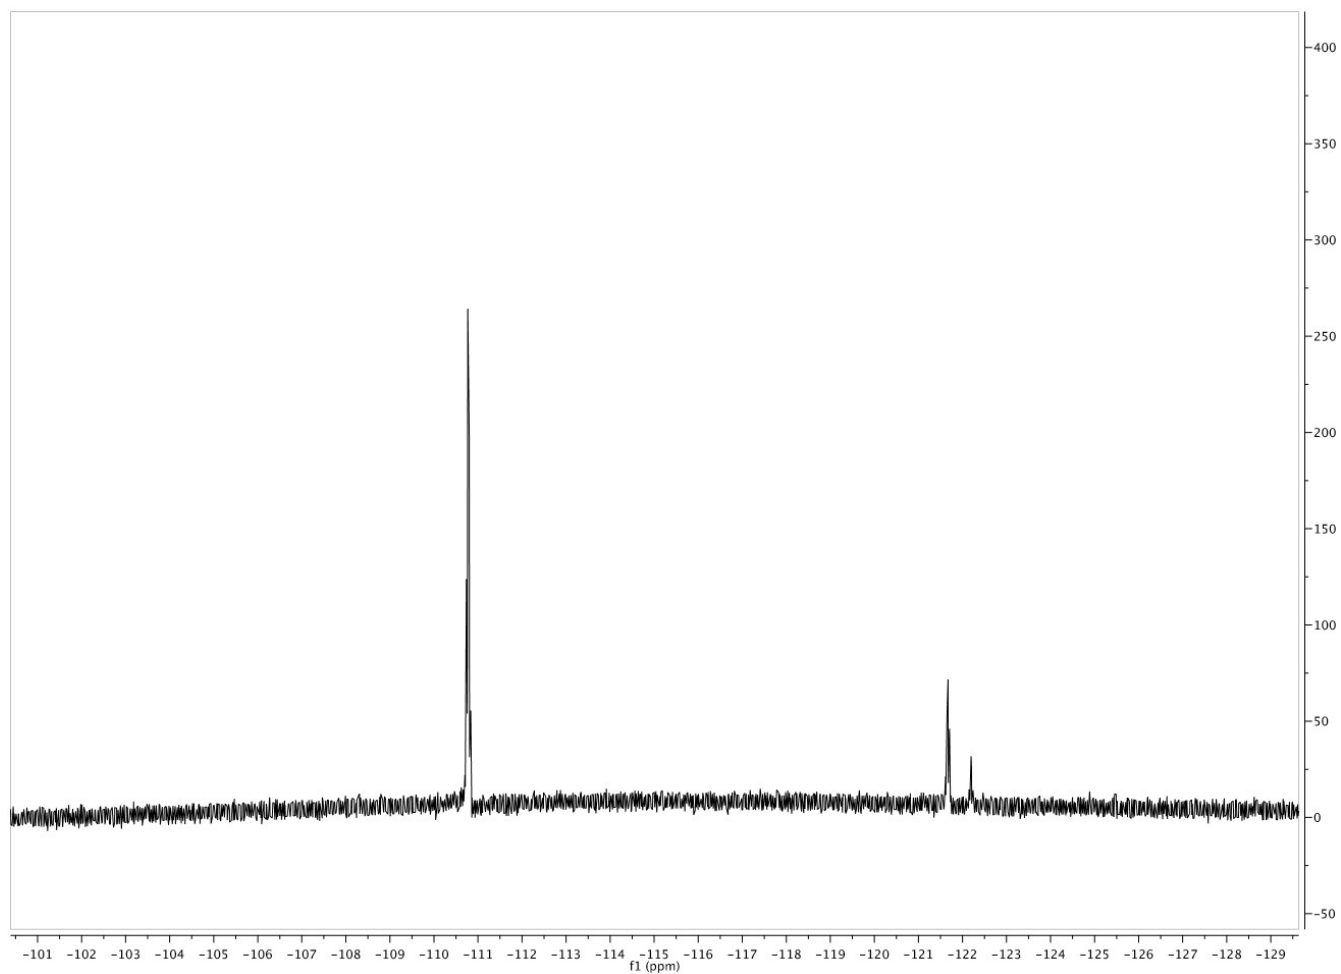

$^{31}\text{P}\{^1\text{H}\}$  NMR (121 MHz,  $\text{C}_7\text{D}_8$ )

$t = 84 \text{ h}, 120 \text{ }^\circ\text{C}$

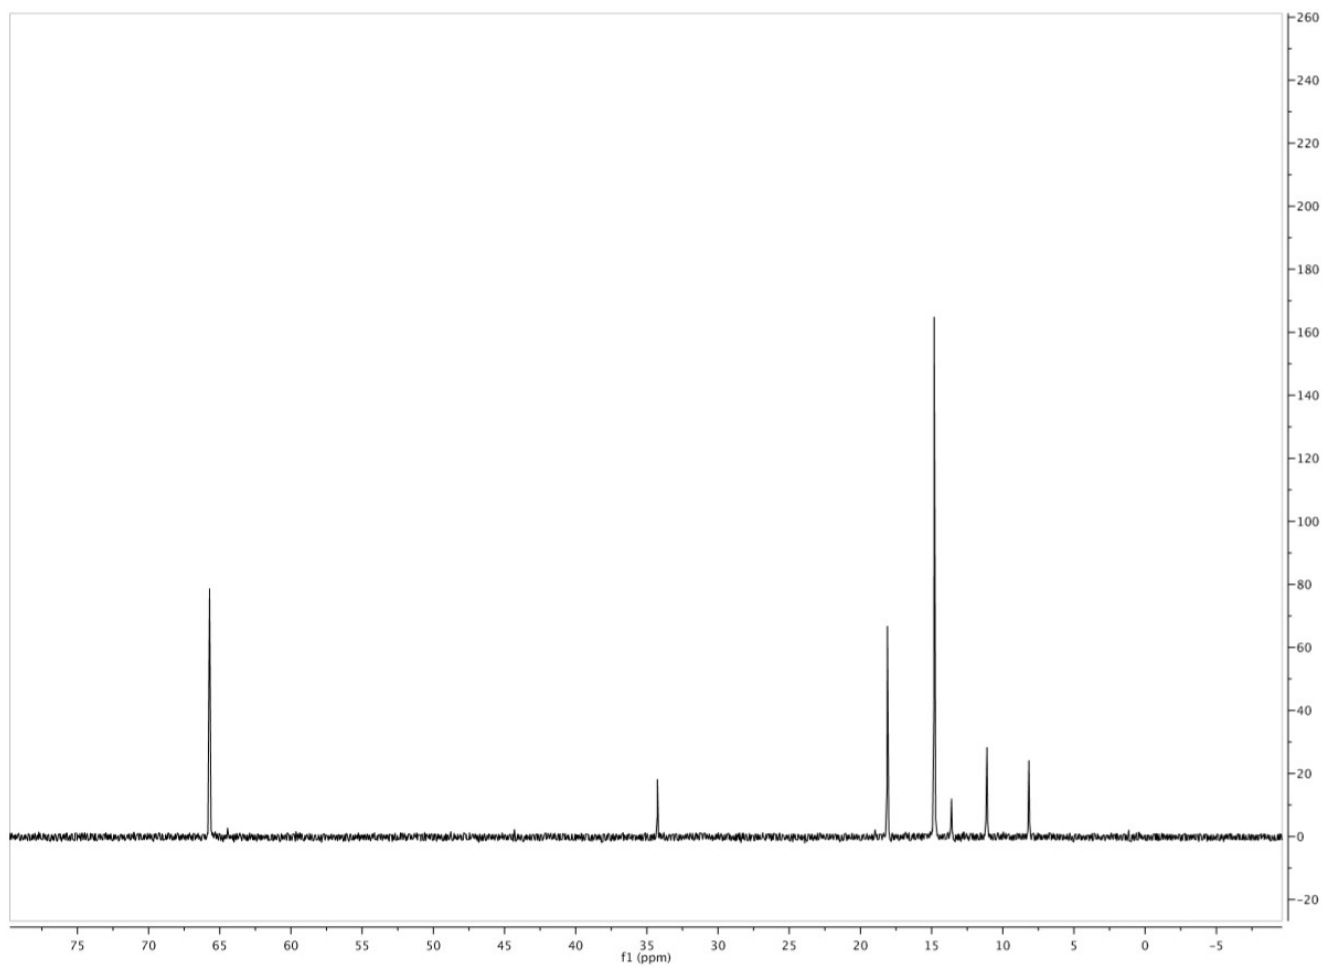

$^{19}\text{F}\{^1\text{H}\}$  NMR (282 MHz,  $\text{C}_7\text{D}_8$ )

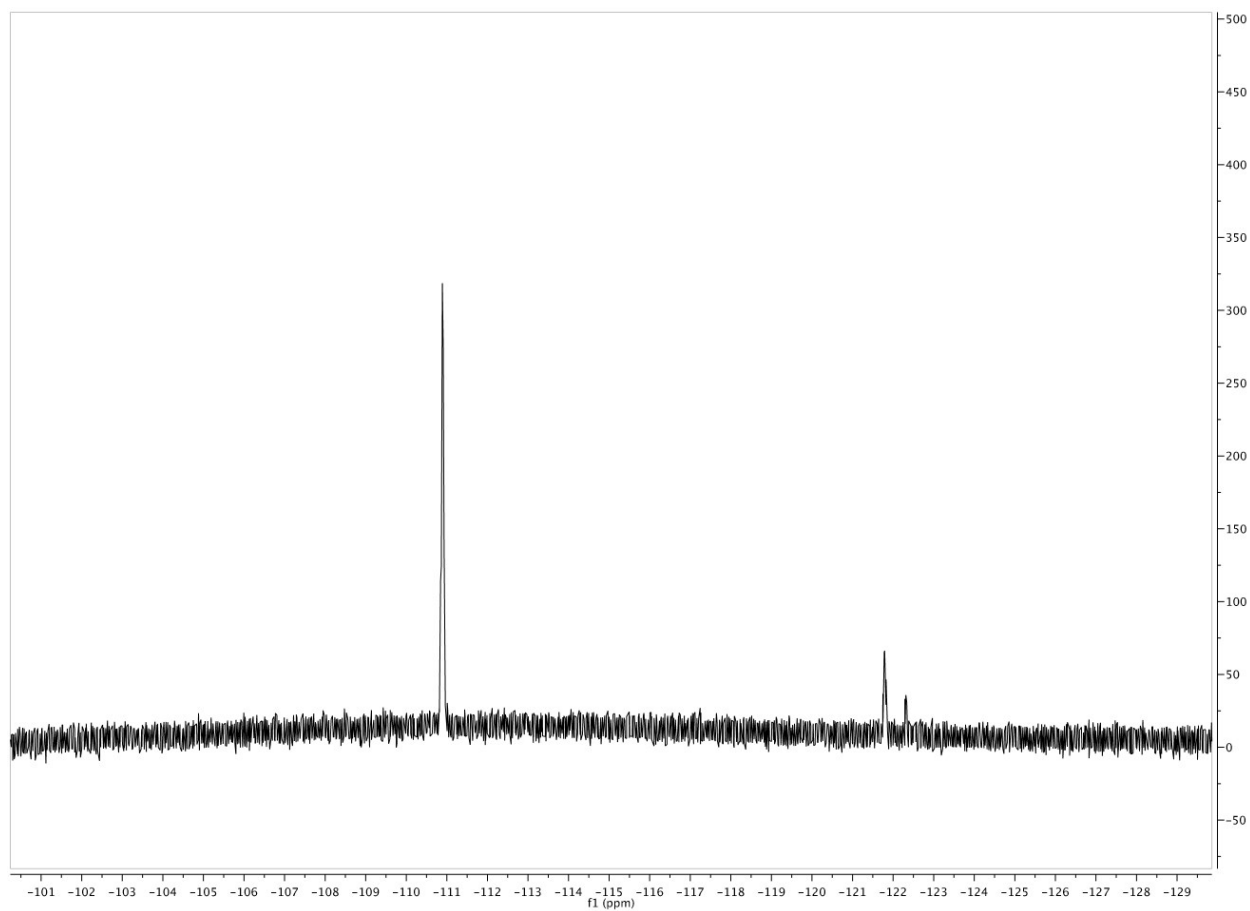

$^{31}\text{P}\{^1\text{H}\}$  NMR (121 MHz,  $\text{C}_7\text{D}_8$ )

$t = 96 \text{ h}, 120 \text{ }^\circ\text{C}$

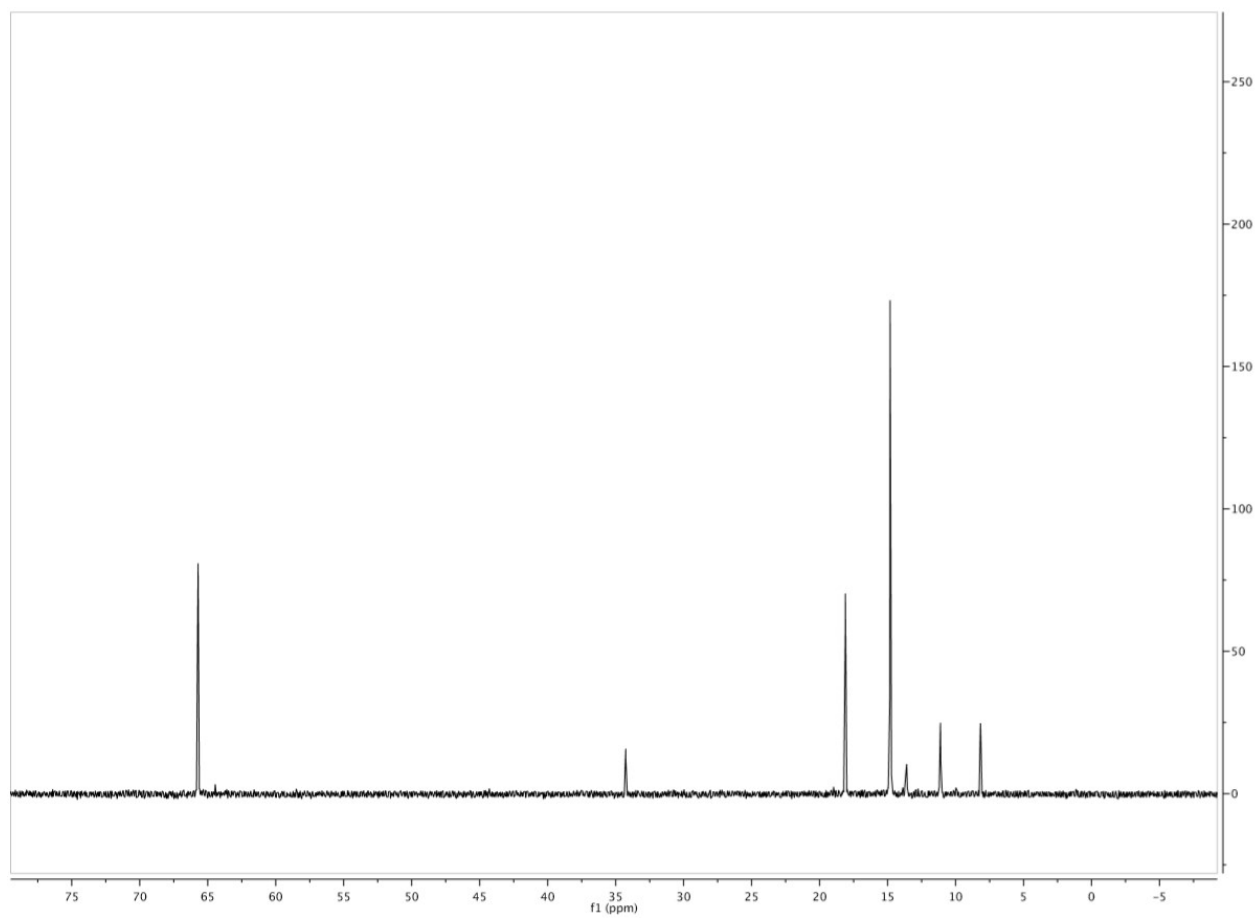



$^{19}\text{F}\{^1\text{H}\}$  NMR (282 MHz,  $\text{C}_7\text{D}_8$ )

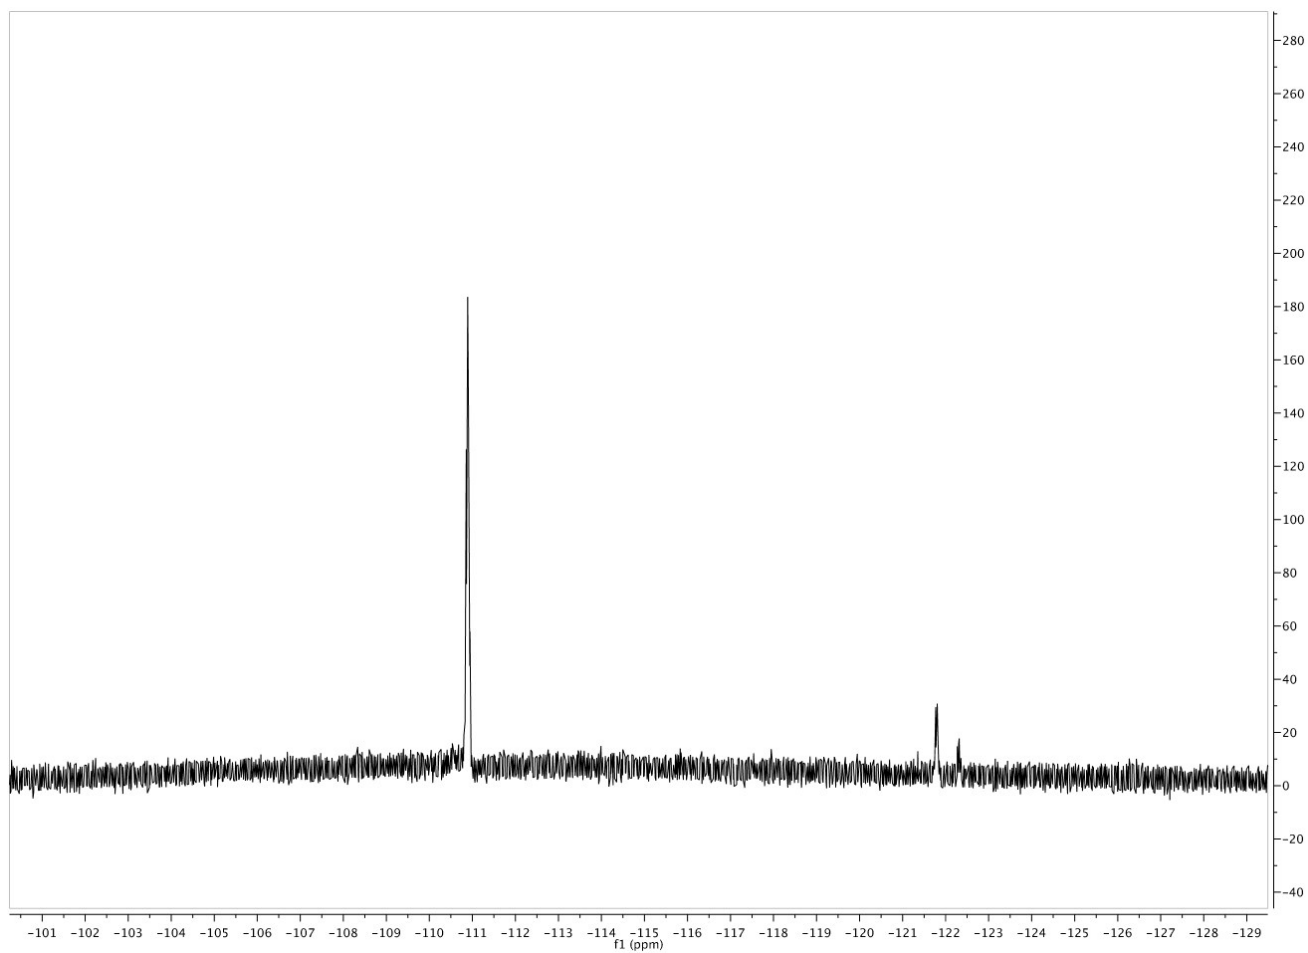

$^{31}\text{P}\{^1\text{H}\}$  NMR (121 MHz,  $\text{C}_7\text{D}_8$ )

$t = 108 \text{ h}, 120 \text{ }^\circ\text{C}$

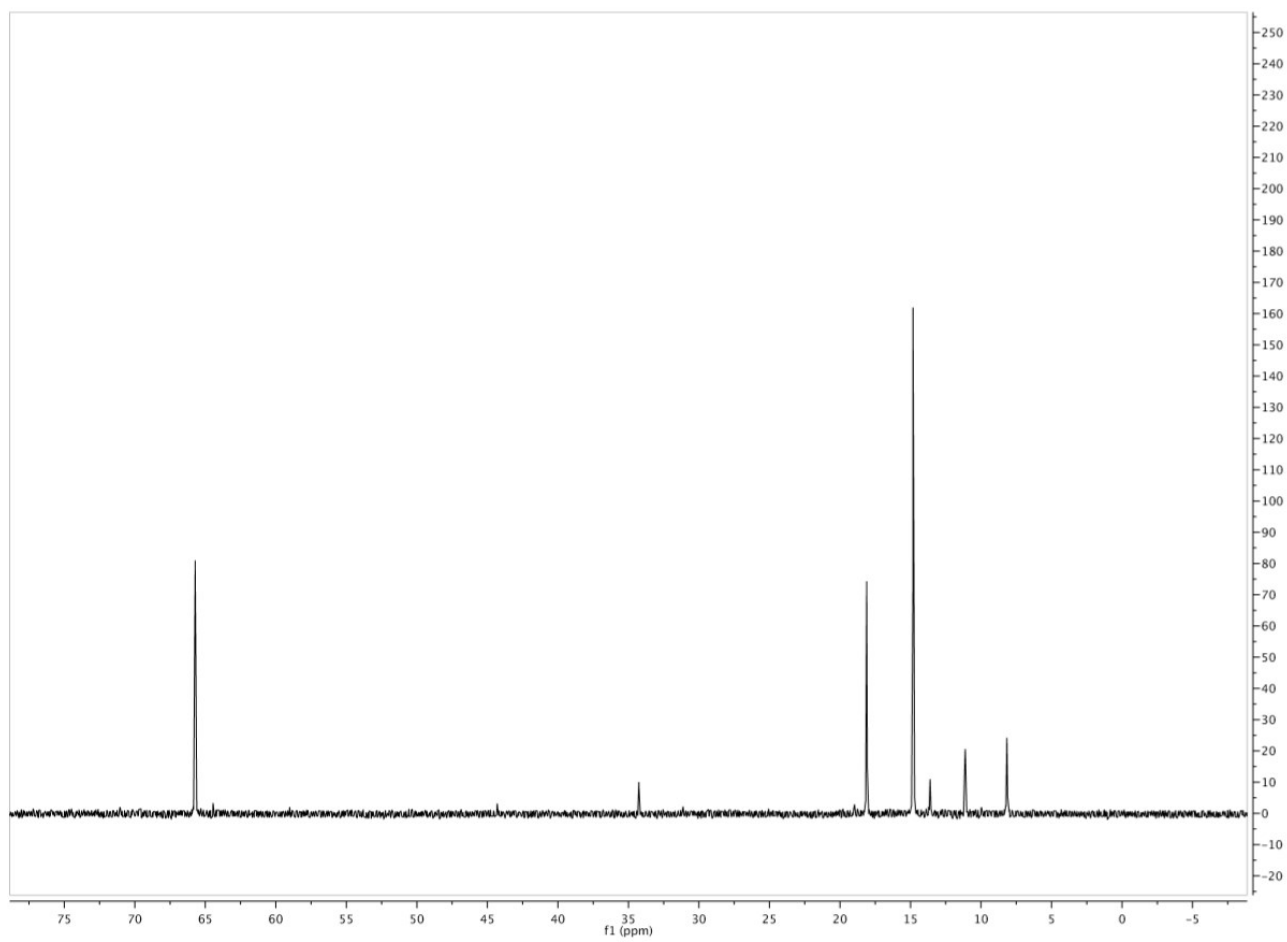

$^{19}\text{F}\{^1\text{H}\}$  NMR (282 MHz,  $\text{C}_7\text{D}_8$ )

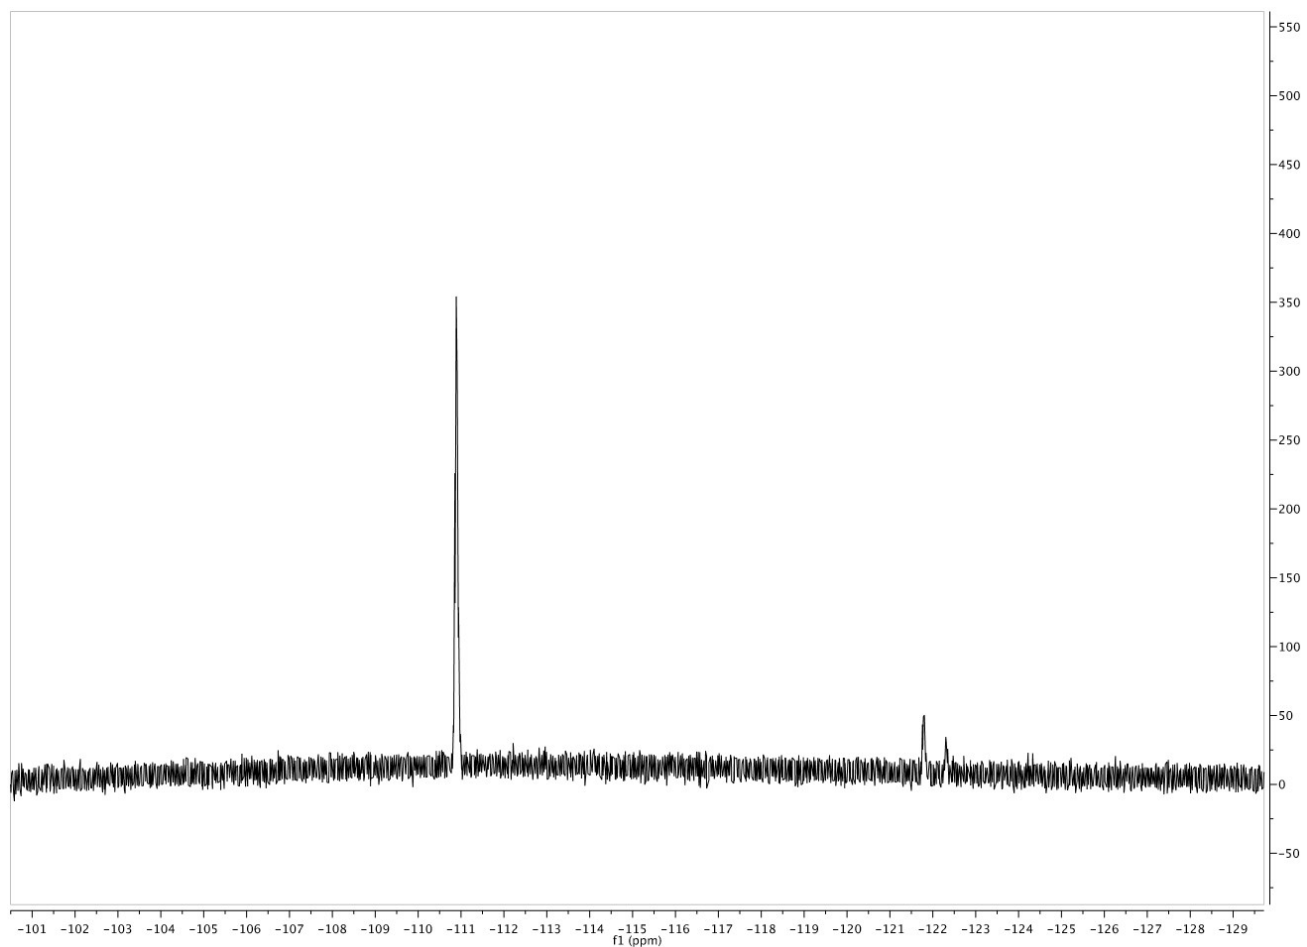

$^{31}\text{P}\{^1\text{H}\}$  NMR (121 MHz,  $\text{C}_7\text{D}_8$ )

**t = 120 h, 120 °C**

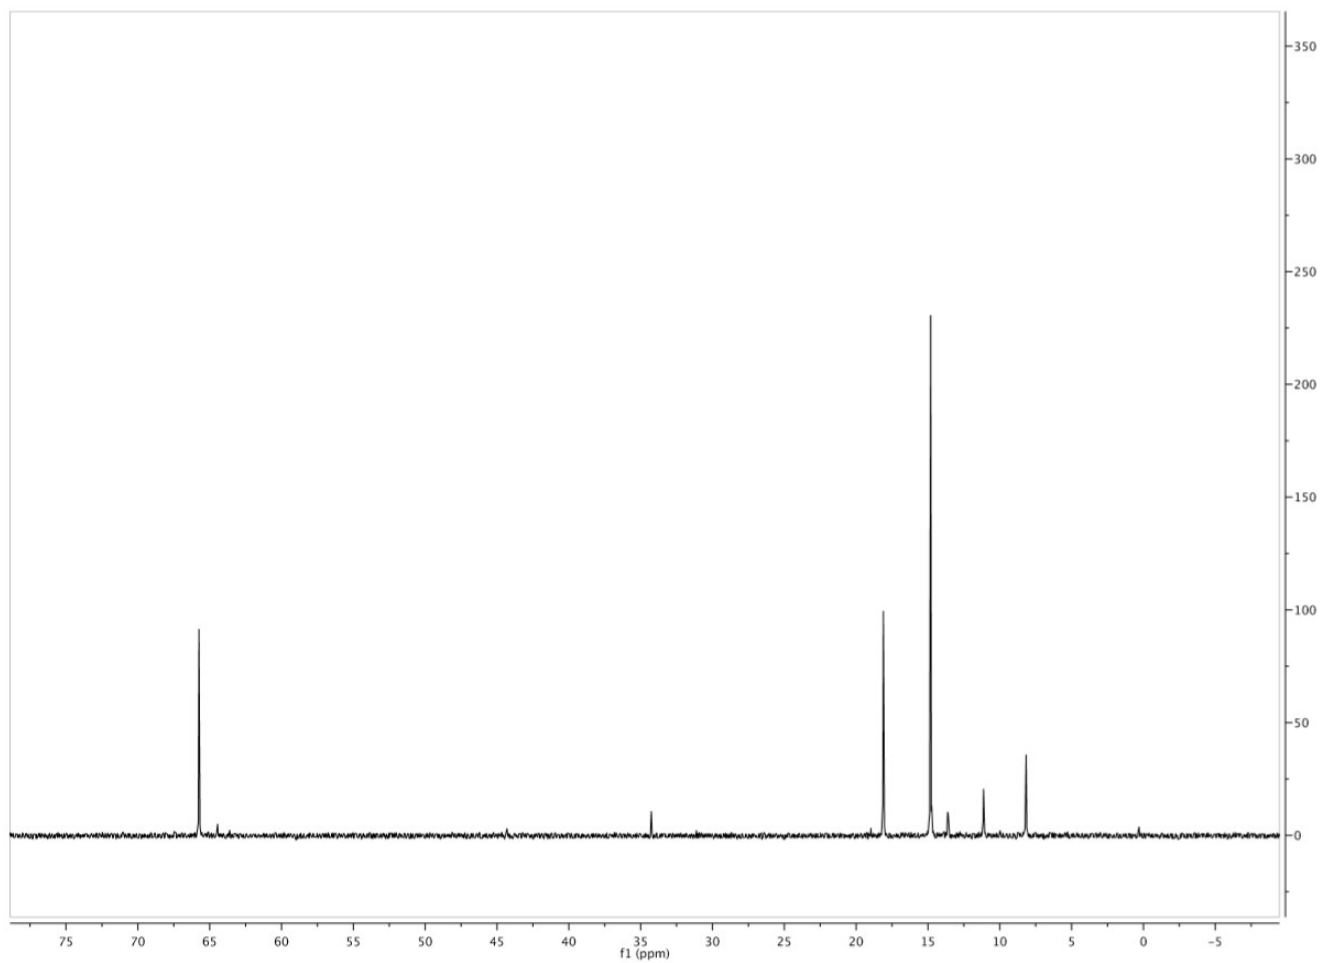

$^{19}\text{F}\{^1\text{H}\}$  NMR (282 MHz,  $\text{C}_7\text{D}_8$ )

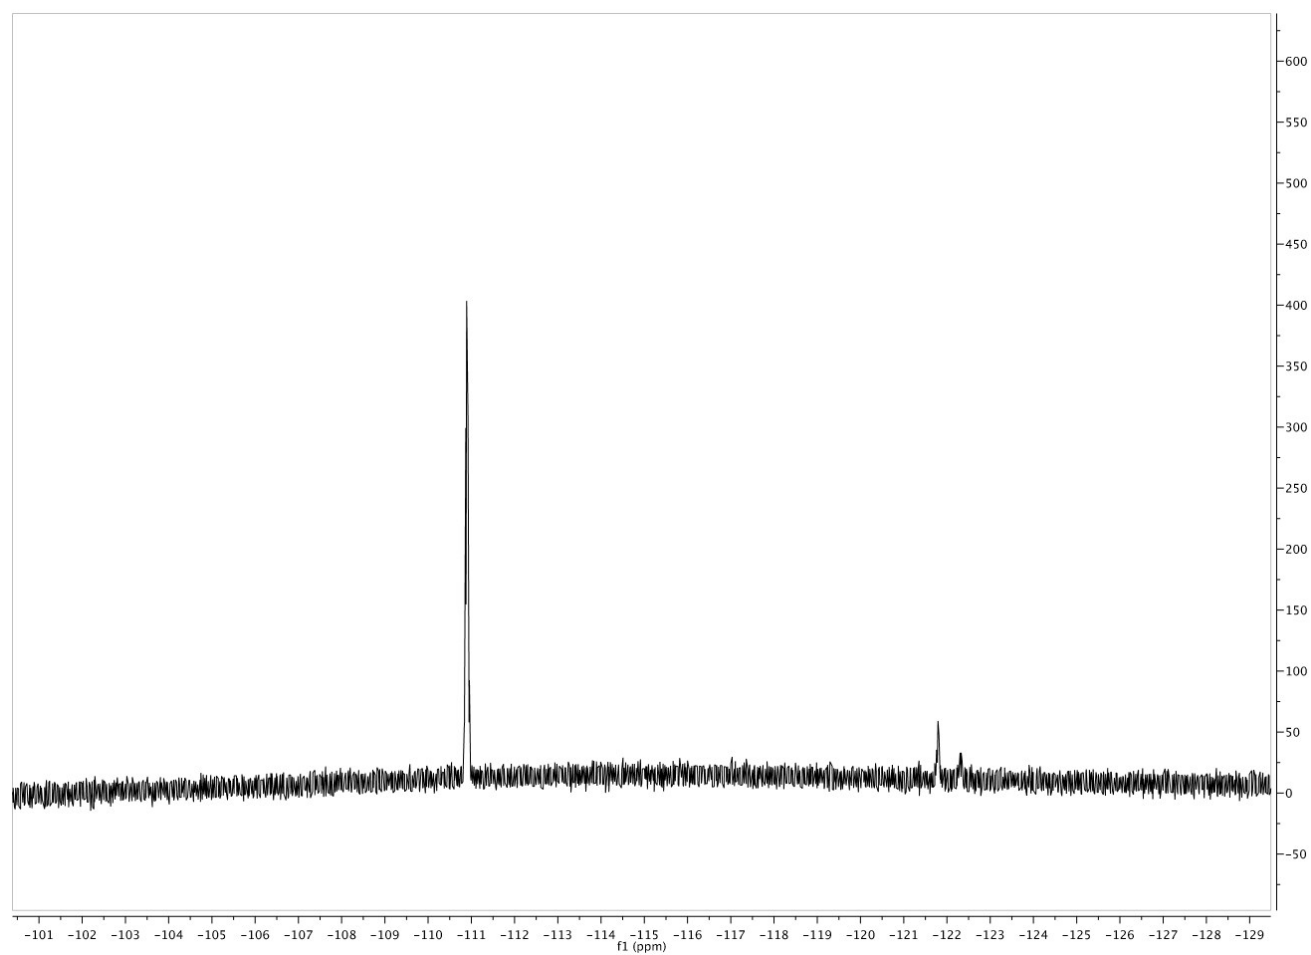

$^{31}\text{P}\{^1\text{H}\}$  NMR (121 MHz,  $\text{C}_7\text{D}_8$ )

$t = 132 \text{ h}, 120 \text{ }^\circ\text{C}$

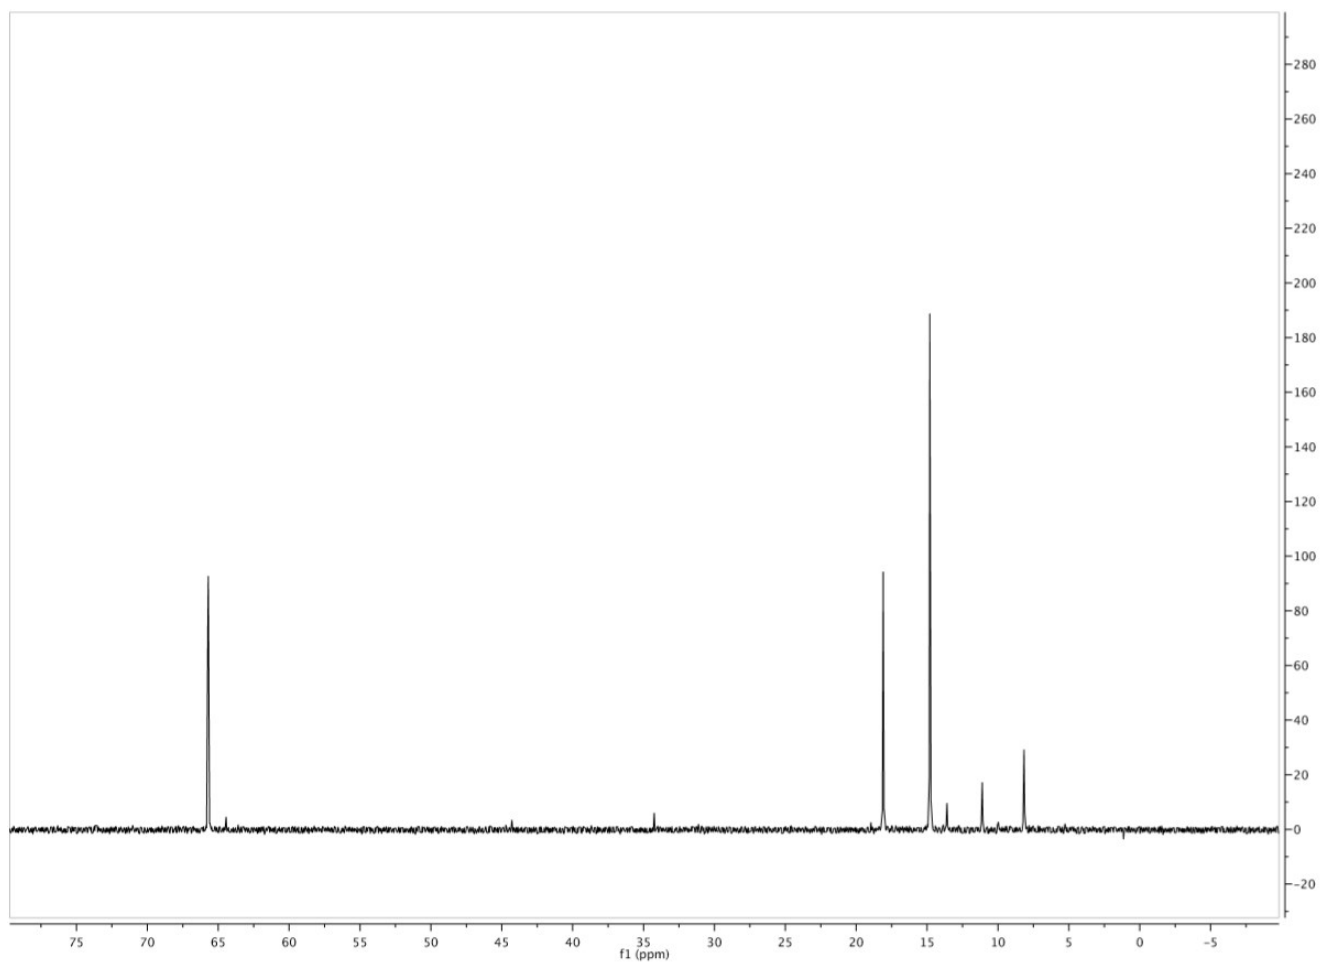

$^{19}\text{F}\{^1\text{H}\}$  NMR (282 MHz,  $\text{C}_7\text{D}_8$ )

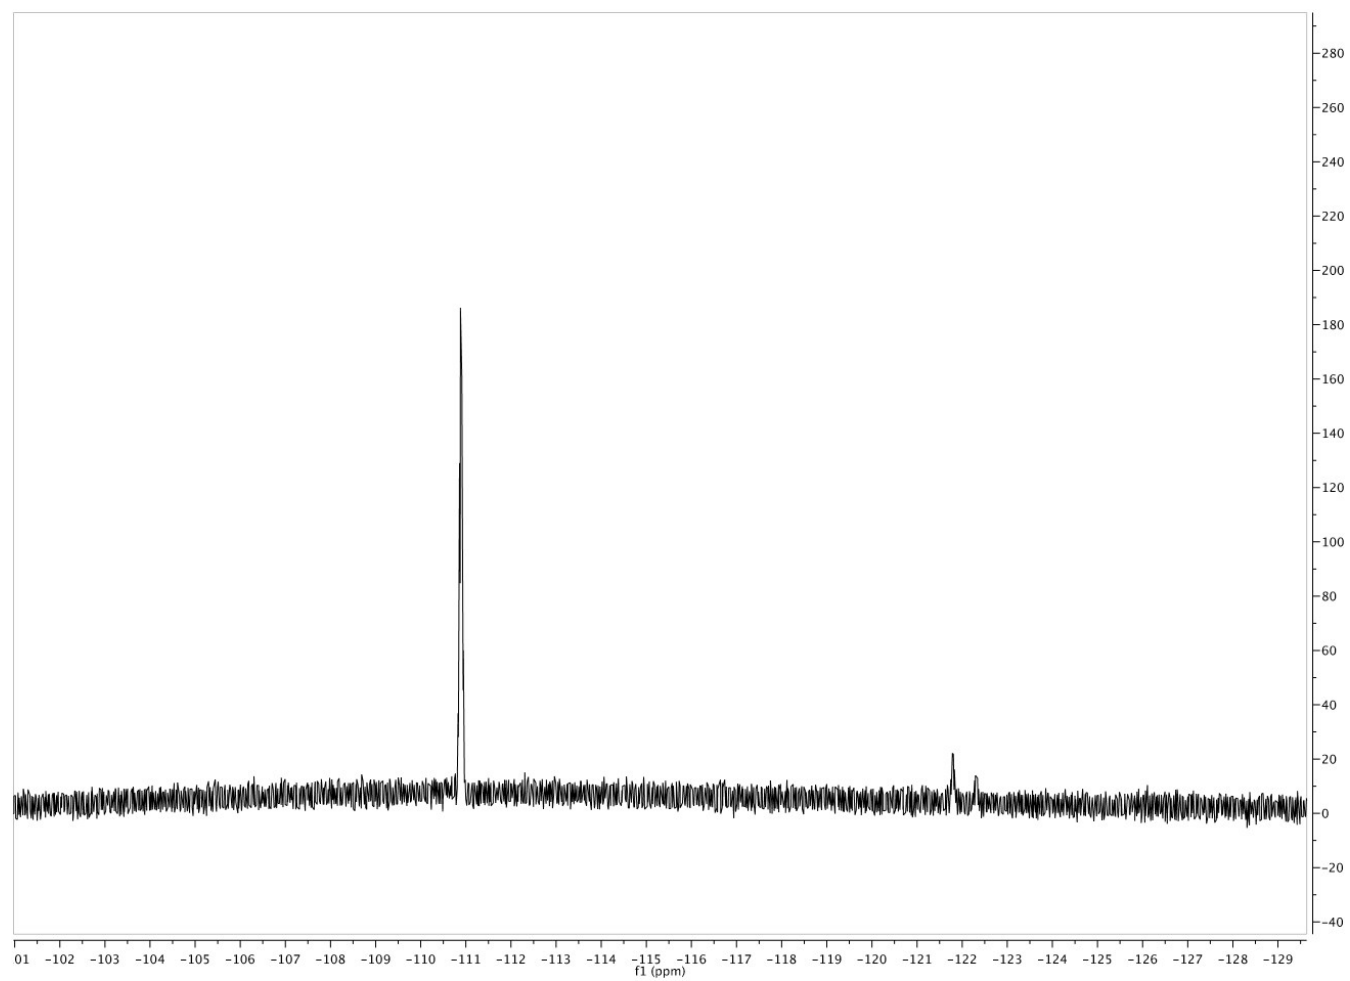

## Catalytic Studies.

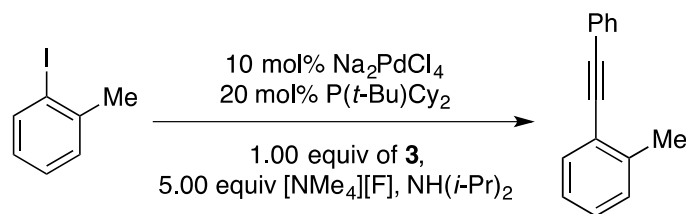

Na<sub>2</sub>PdCl<sub>4</sub> (19 mg, 0.065 mmol, 10 mol%) and P(*t*-Bu)Cy<sub>2</sub> (32 mg, 0.126 mmol, 20 mol%) were loaded into a Schlenk bomb fitted with a screw-top Teflon cap and suspended in ~10 mL of NH(*i*-Pr)<sub>2</sub>. The Schlenk bomb was sealed and brought outside of the glovebox, the Teflon cap was replaced with a rubber septum under positive N<sub>2</sub> pressure, and 1-iodo-2-methylbenzene was injected via syringe (80 μL, 0.628 mmol, 1 equiv). The rubber septum was removed under positive N<sub>2</sub> pressure, the Schlenk bomb was resealed, and the reaction mixture was placed in an oil bath at 80 °C for 20 min (for activation), affording a pale-yellow solution. The Schlenk bomb was brought back inside the glovebox and tetramethylammonium fluoride (TMAF) (293 mg, 3.15 mmol, 5 equiv) was added followed by [PN]-CCPh (**3**) (250 mg, 0.629 mmol, 1 equiv). The contents of the Schlenk bomb were brought back outside the glovebox and heated at 120 °C. Over the next 96 h, the reaction mixture grew increasingly orange, but its appearance was obscured by a large amount of grey precipitate. The reaction mixture was then concentrated under vacuum at 80 °C to remove the relatively high boiling amine solvent. The residual non-volatiles were extracted with 10 mL of pentane and filtered through a silica plug. The plug was washed with an additional 25 mL of pentane and the filtrate was concentrated under vacuum, affording a clear oil (33 mg, 0.172 mmol, 27%). The purity of Ph-C≡C-(*o*-Tol) was confirmed by <sup>1</sup>H and <sup>13</sup>C{<sup>1</sup>H} NMR spectroscopy (see below).



<sup>1</sup>H NMR (500 MHz, CDCl<sub>3</sub>)  
(CDCl<sub>3</sub> from benchtop containing water and residual grease)

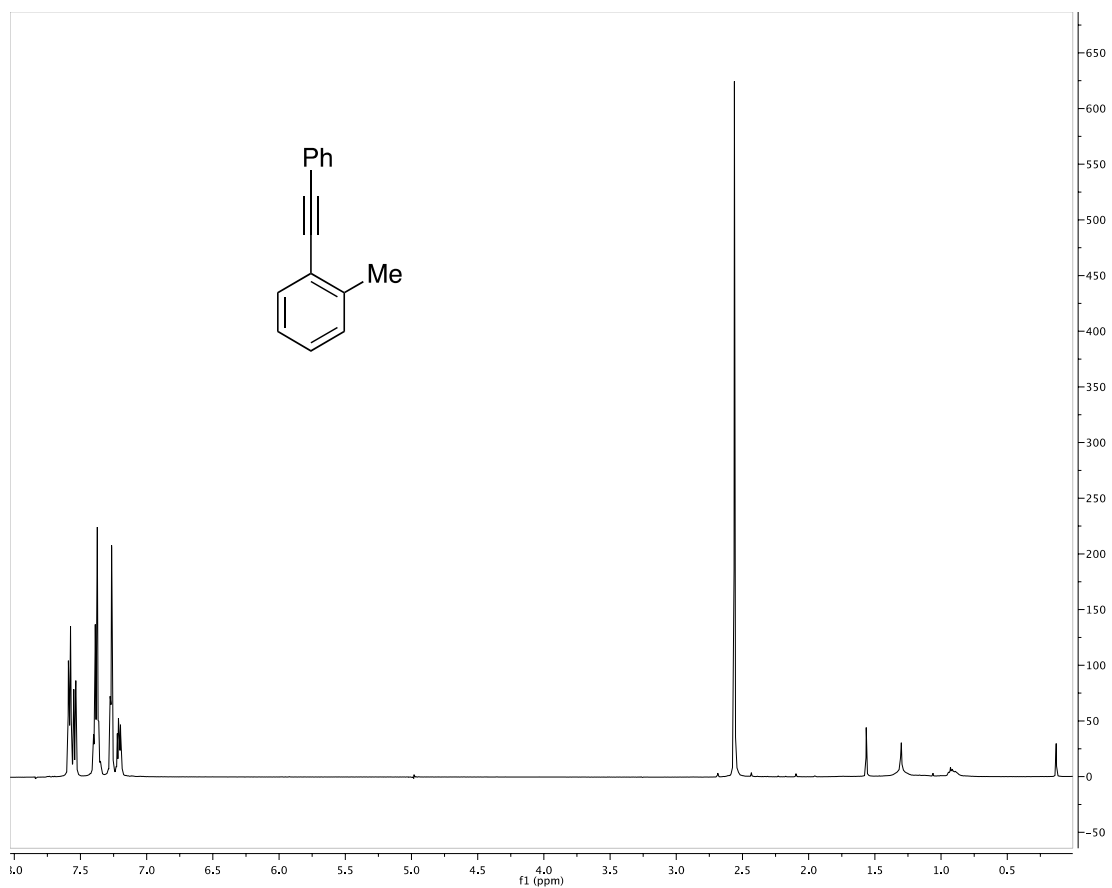

$^{13}\text{C}\{^1\text{H}\}$  NMR (125 MHz,  $\text{CDCl}_3$ )  
( $\text{CDCl}_3$  from benchtop containing water and residual grease)

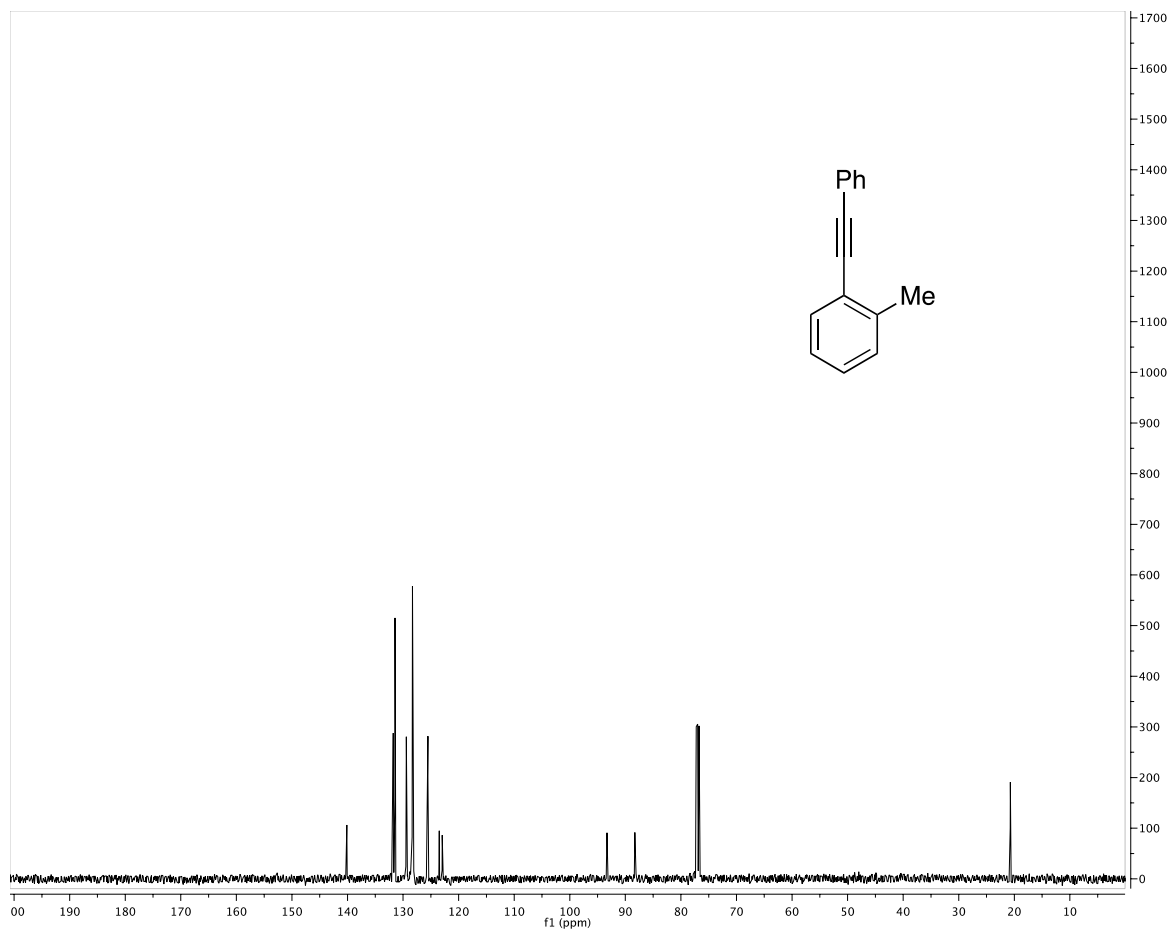

**Pre-Revision Catalysis.** In an earlier iteration, the catalysis was performed using CuI as the additive (instead of CsF or TMAF). After comments by the reviewers and subsequent experiments, the effect of / advantages associated with CuI became unclear. Under these conditions and using a workup similar to what is described above, the desired product (Ph-C≡C-(*o*-Tol)) was contaminated with diyne (Ph-C≡C-C≡C-Ph). Separation of these two components required reverse-phase HPLC using a Phenomenex Gemini C18 preparative column (250 x 21.2 mm, 5 μm; PDA detection, flowrate: 12 mL/min) with 75% (acetonitrile/water with 0.1% formic acid) isocratic condition, yielding pure fractions of the targeted product and diyne. The clean fractions are shown below.

<sup>1</sup>H NMR (500 MHz, CDCl<sub>3</sub>)

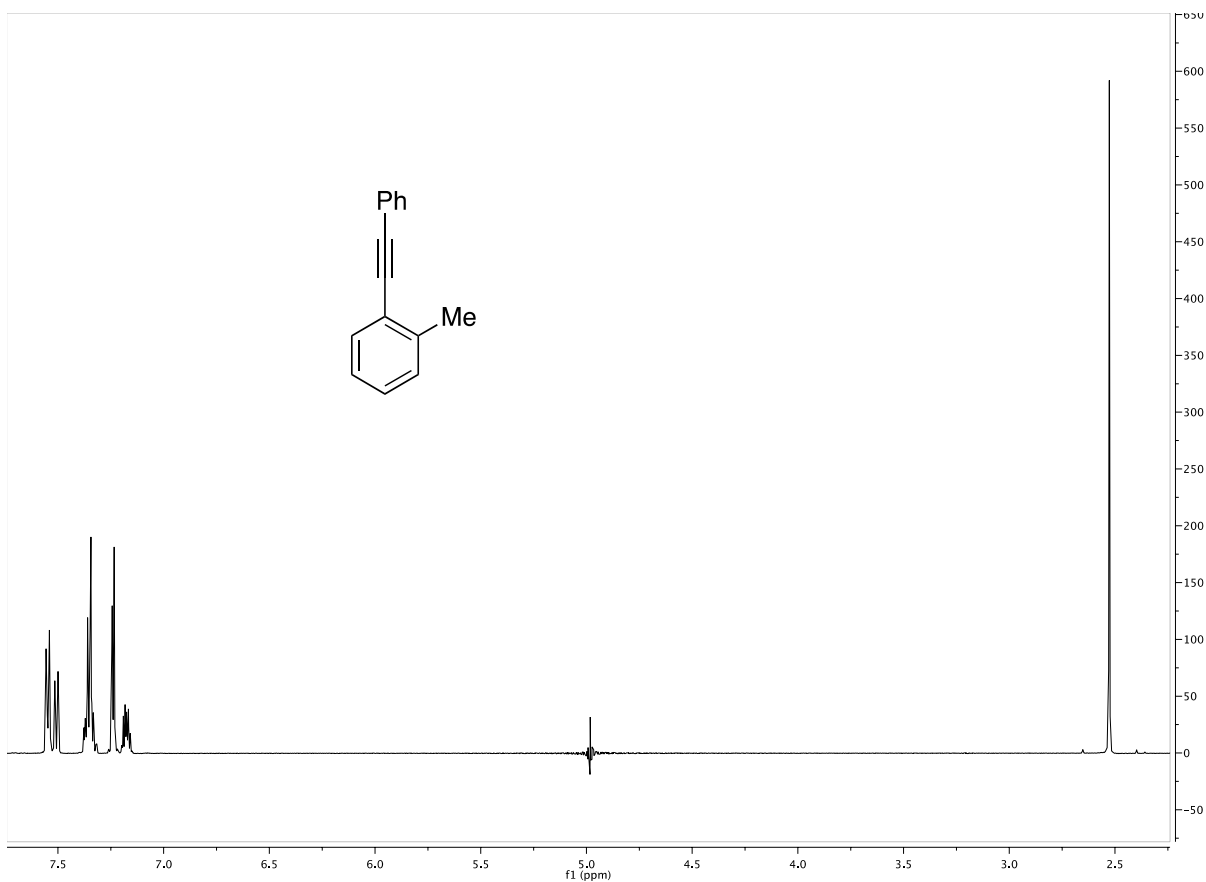

$^{13}\text{C}\{^1\text{H}\}$  NMR (125 MHz,  $\text{CDCl}_3$ )

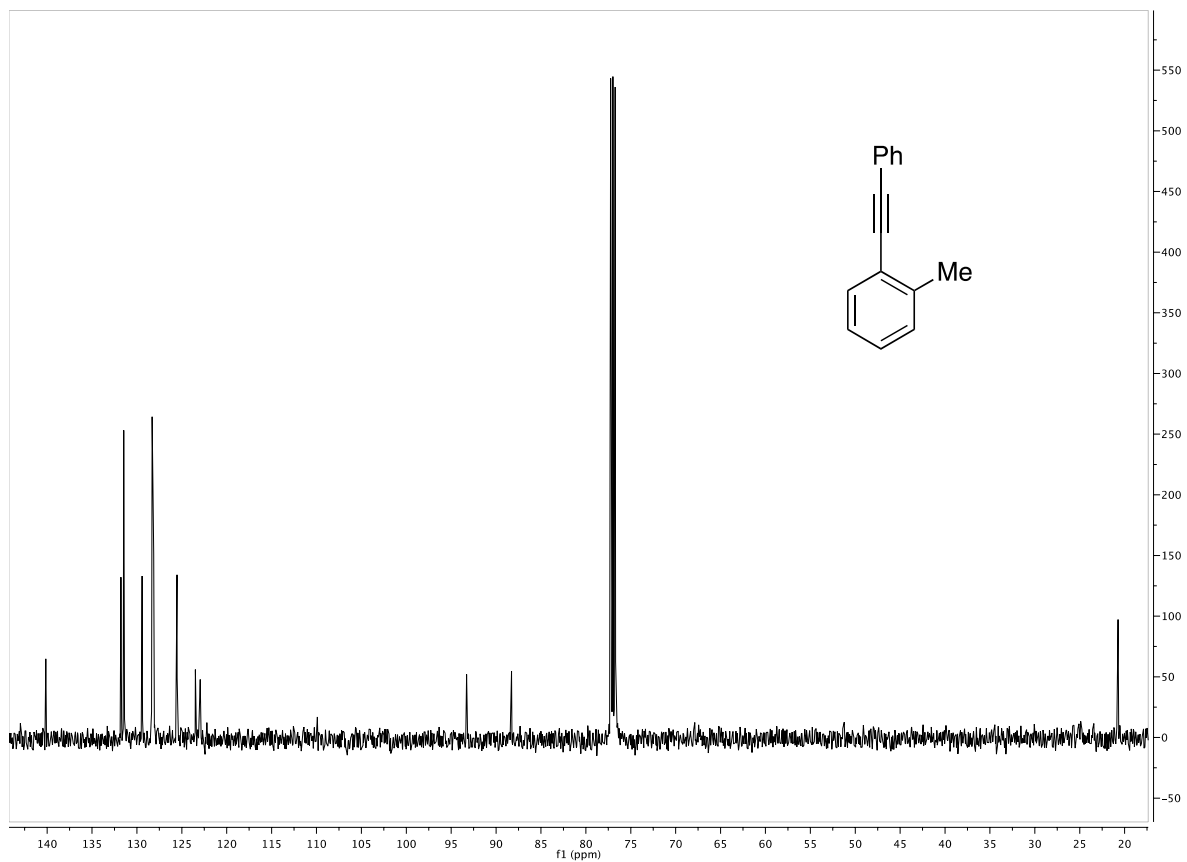

$^1\text{H}$  NMR (500 MHz,  $\text{CDCl}_3$ )  
Diyne Byproduct ( $\text{Ph-C}\equiv\text{C-C}\equiv\text{C-Ph}$ )

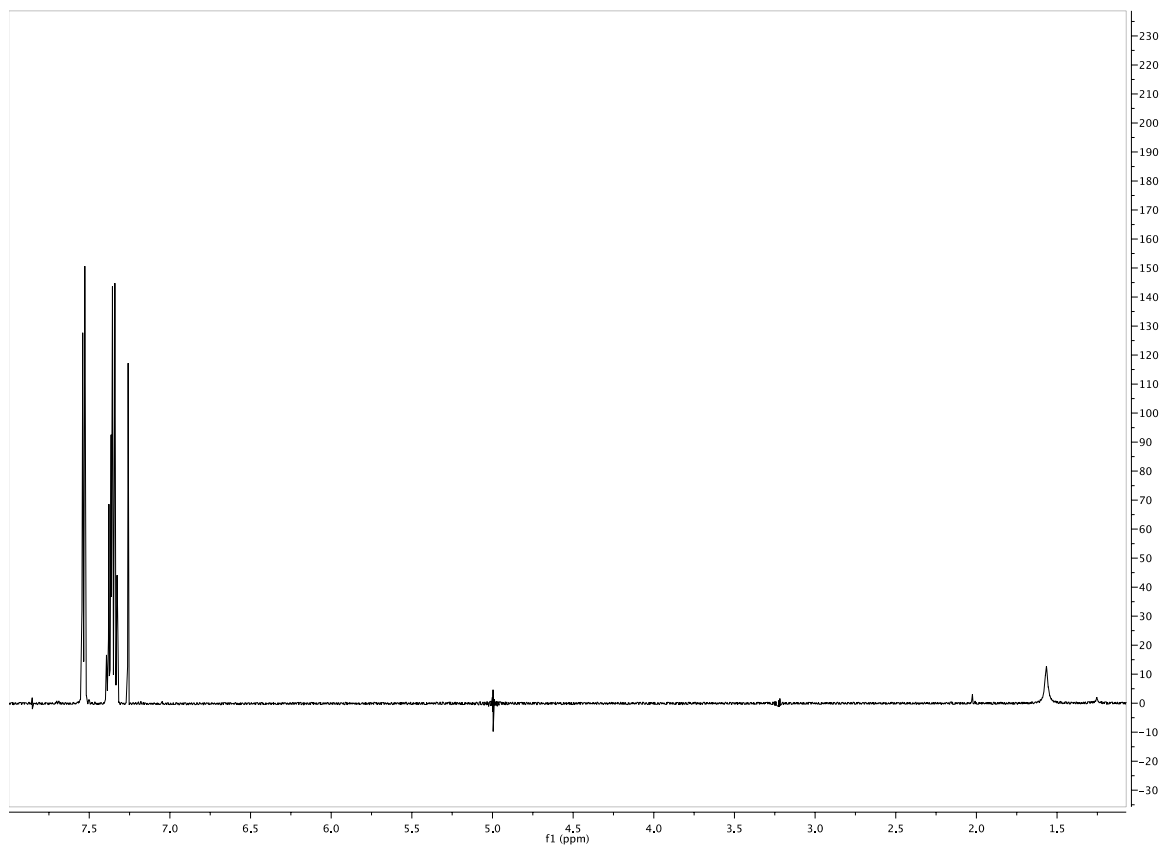

$^{13}\text{C}\{^1\text{H}\}$  NMR (125 MHz,  $\text{CDCl}_3$ )  
Diyne Byproduct ( $\text{Ph-C}\equiv\text{C-C}\equiv\text{C-Ph}$ )

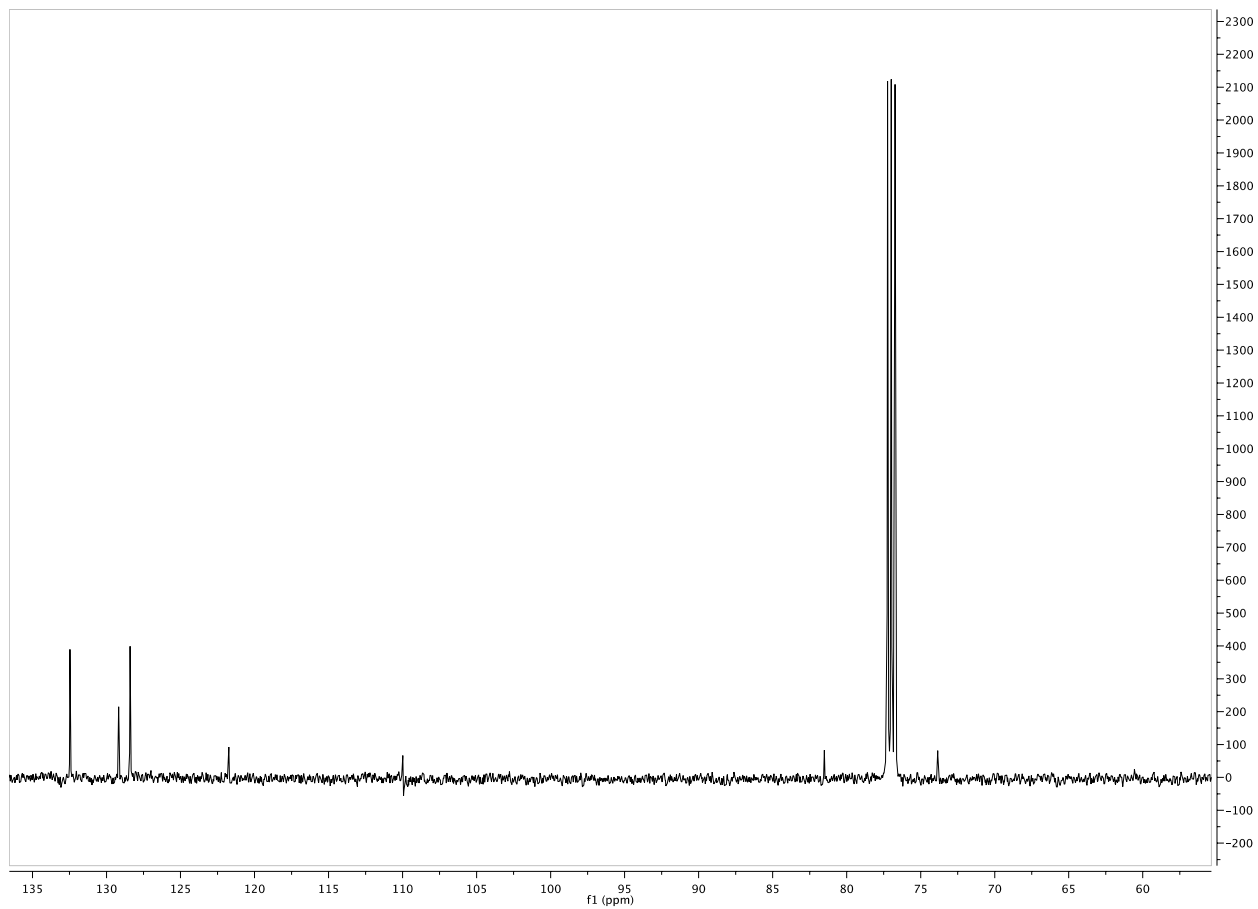

### 3. DFT AND NBO RESULTS FOR AZAPHOSPHOLANES: Calculated Structures (B3LYP-D3/LACV3P\*\*)

| CAIN71                                                                                                                                                                                                                                                                    | CAIN79                                                                                                                                                                                                                                                                    |
|---------------------------------------------------------------------------------------------------------------------------------------------------------------------------------------------------------------------------------------------------------------------------|---------------------------------------------------------------------------------------------------------------------------------------------------------------------------------------------------------------------------------------------------------------------------|
| 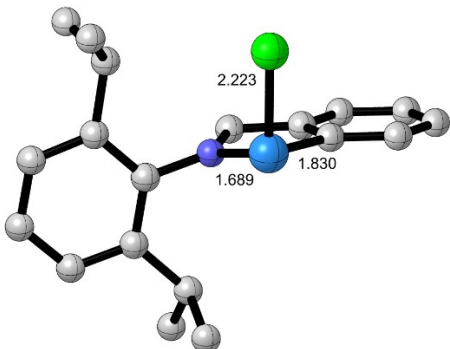 <p data-bbox="300 903 673 1060">                     NBO charges P +1.06 Cl -0.41<br/>                     P-Cl is 45% ionic<br/>                     WBI 0.735                 </p>    |  <p data-bbox="925 903 1291 1060">                     NBO charges P +1.03 C -0.36<br/>                     P-C is 31% ionic<br/>                     WBI 0.937                 </p>    |
| DIAZAPHOSPHOLANE-CHLORO                                                                                                                                                                                                                                                   | DIAZAPHOSPHOLANE-ALKYNYL                                                                                                                                                                                                                                                  |
|  <p data-bbox="300 1522 673 1680">                     NBO charges P +1.21 Cl -0.50<br/>                     P-Cl is 50% ionic<br/>                     WBI 0.613                 </p> |  <p data-bbox="925 1596 1291 1753">                     NBO charges P +1.20 C -0.38<br/>                     P-C is 31% ionic<br/>                     WBI 0.906                 </p> |

The P-Cl and P-CC bonds are shorter in each of your compounds due to lower occupancy of the P-Cl or P-C  $\sigma^*$  orbital, as shown in the NLMOs below. This occupancy, which makes for a longer bond, comes from (mostly) delocalization of the adjacent N-lone pair(s) i.e. hyperconjugation. The stabilization in each case is quantified in kcal/mol below.

| CAIN71                                                                                                                                                                                                                                                                | CAIN79                                                                                                                                                                                                                                                                  |
|-----------------------------------------------------------------------------------------------------------------------------------------------------------------------------------------------------------------------------------------------------------------------|-------------------------------------------------------------------------------------------------------------------------------------------------------------------------------------------------------------------------------------------------------------------------|
| 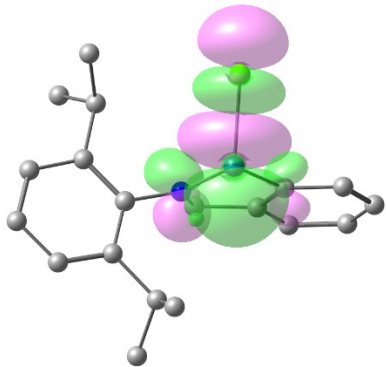 <p data-bbox="342 957 659 989">P-Cl <math>\sigma^*</math> occupancy 0.180e</p> <p data-bbox="240 1018 764 1050">Delocalization energy of <math>N_{lp}</math> 21.8 kcal/mol</p>      |  <p data-bbox="971 989 1284 1020">P-C <math>\sigma^*</math> occupancy 0.067e</p> <p data-bbox="873 1045 1382 1077">Delocalization energy of <math>N_{lp}</math> 8.1 kcal/mol</p>      |
| DIAZAPHOSPHOLANE-CHLORO                                                                                                                                                                                                                                               | DIAZAPHOSPHOLANE-ALKYNYL                                                                                                                                                                                                                                                |
|  <p data-bbox="342 1650 659 1682">P-Cl <math>\sigma^*</math> occupancy 0.335e</p> <p data-bbox="232 1707 773 1738">Delocalization energy of <math>2N_{lp}</math> 43.4 kcal/mol</p> |  <p data-bbox="971 1703 1284 1734">P-C <math>\sigma^*</math> occupancy 0.098e</p> <p data-bbox="857 1759 1398 1791">Delocalization energy of <math>2N_{lp}</math> 14.5 kcal/mol</p> |



#### 4. Electrochemistry Experimental Details including all Cyclic Voltammetry Plots

##### General Experimental Details:

All electrochemical measurements on **4** were conducted on a CHI 600E Electrochemical Analyzer with a three-electrode system. A glassy carbon working electrode, a silver wire as the quasi-reference electrode, and a platinum wire as the counter electrode were employed. All cyclic voltammograms were investigated under anhydrous conditions inside a nitrogen-filled glove box. All scans were performed in tetrahydrofuran (THF) with 0.1 M tetrabutylammonium tetrafluorophosphate [Bu<sub>4</sub>N][PF<sub>6</sub>] as the supporting electrolyte. Ferrocene was used as an internal standard.

CV plots at varying scan rate are shown below. Also, an overlay plot is included.

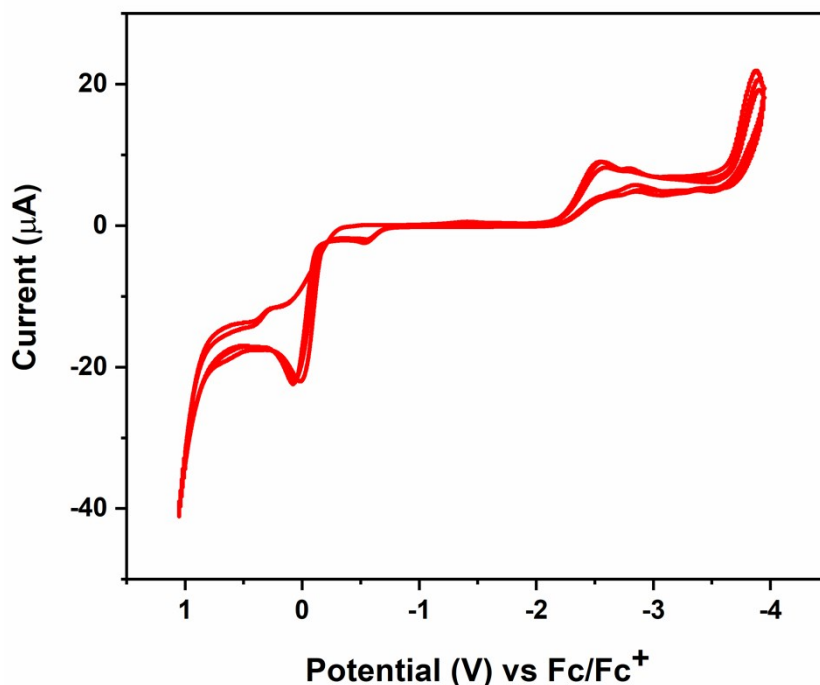

**Figure 1:** Cyclic Voltammogram at 25 mV scan rate.

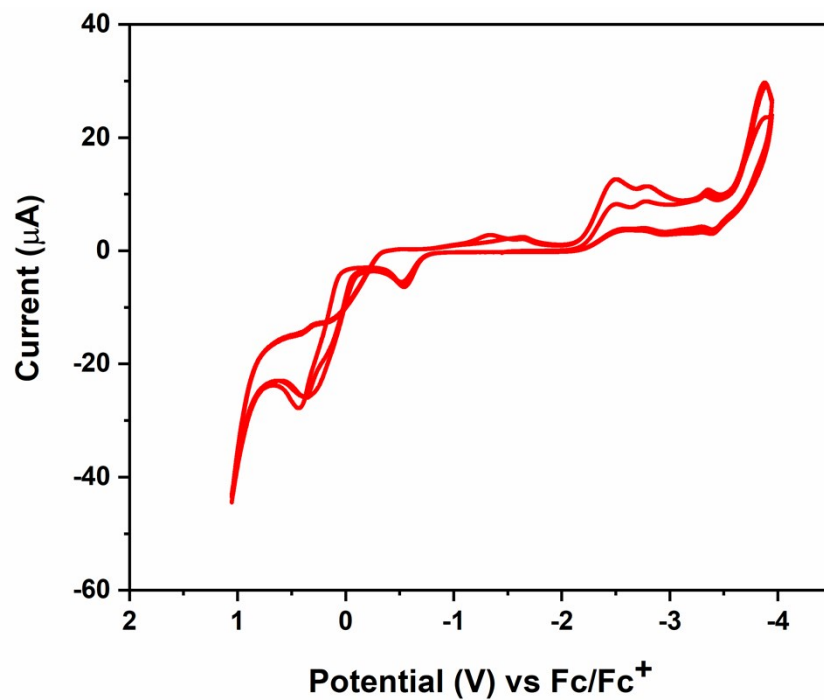

**Figure 2:** Cyclic Voltammogram at 50 mV scan rate.

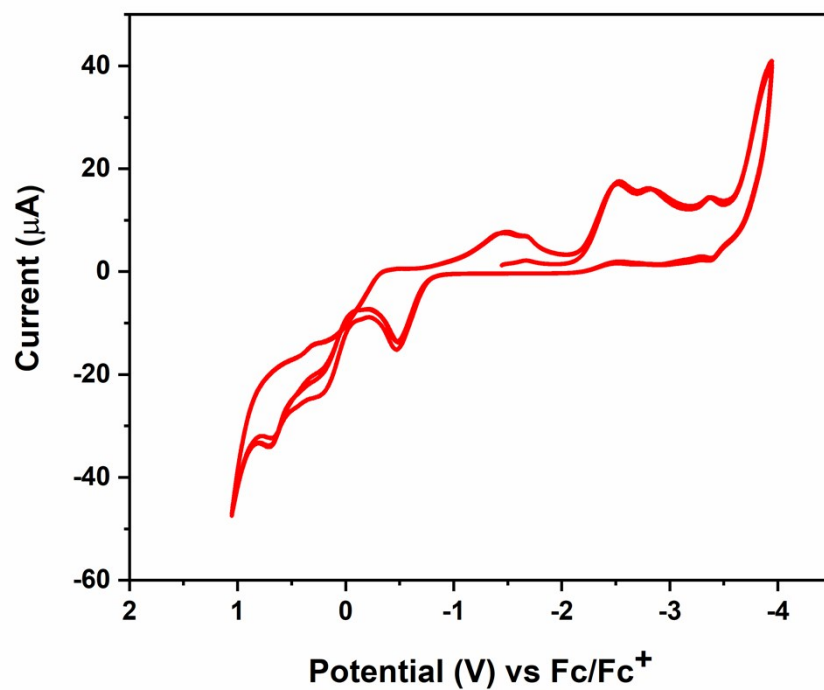

**Figure 3:** Cyclic Voltammogram at 100 mV scan rate.

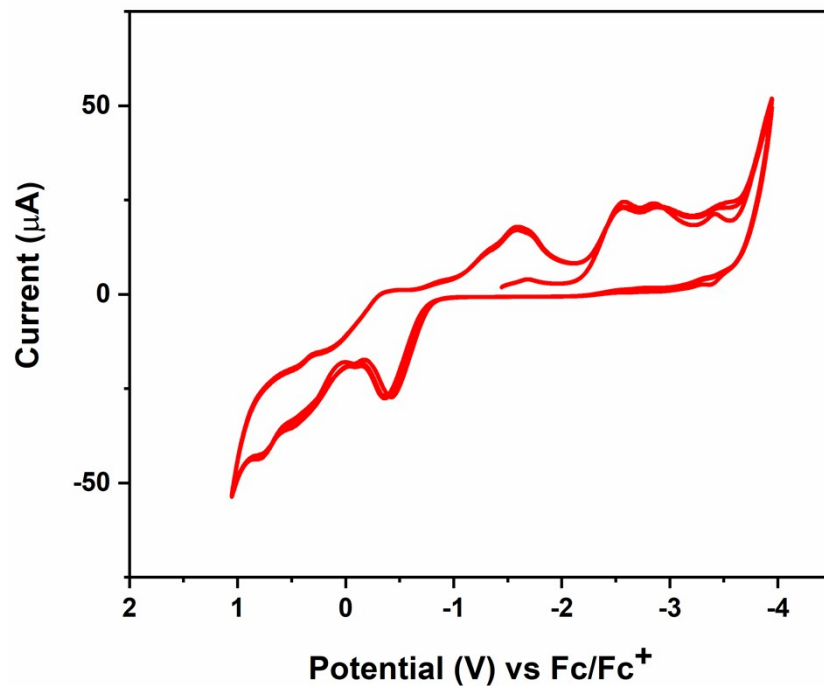

**Figure 4:** Cyclic Voltammogram at 200 mV scan rate.

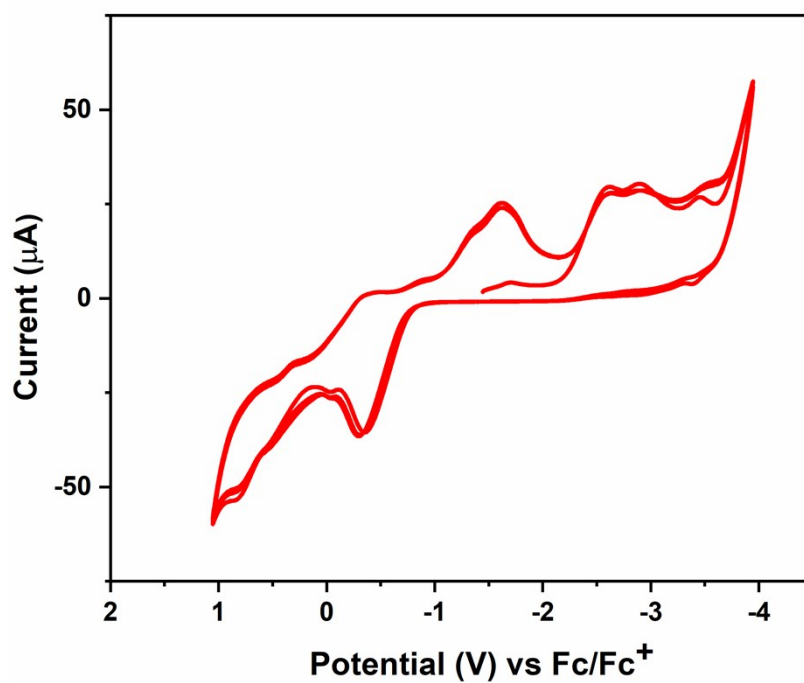

**Figure 5:** Cyclic Voltammogram at 300 mV scan rate.

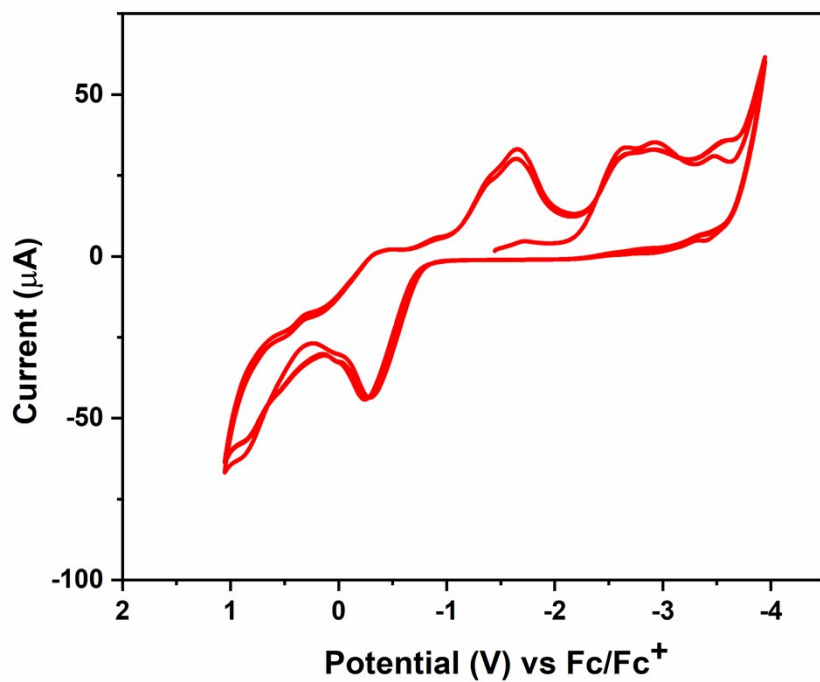

**Figure 6:** Cyclic Voltammogram at 400 mV scan rate.

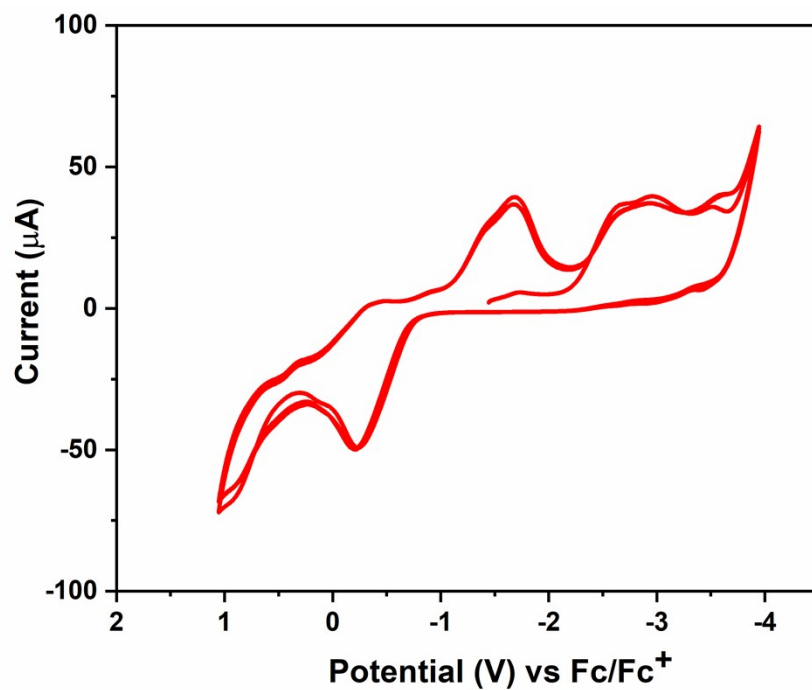

**Figure 7:** Cyclic Voltammogram at 500 mV scan rate.

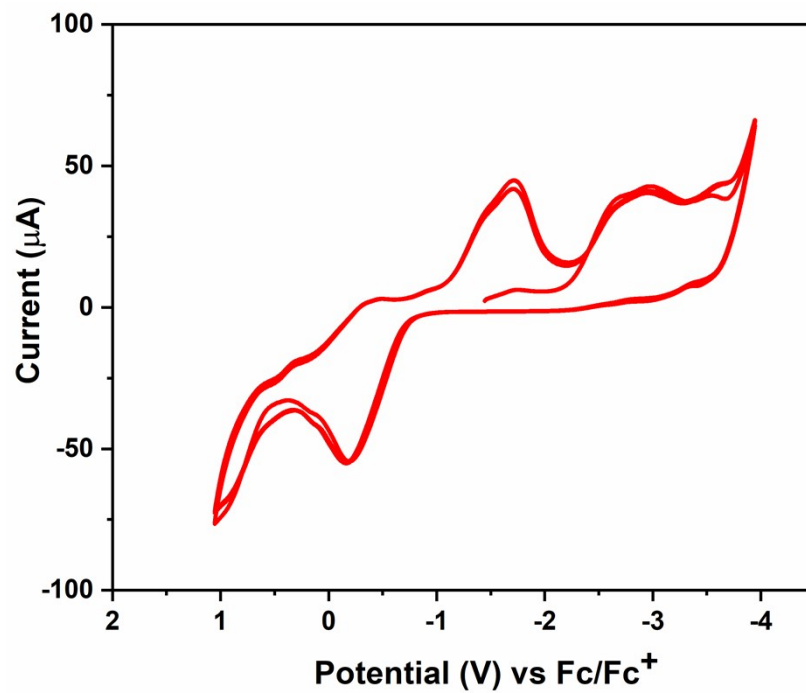

**Figure 8:** Cyclic Voltammogram at 600 mV scan rate.

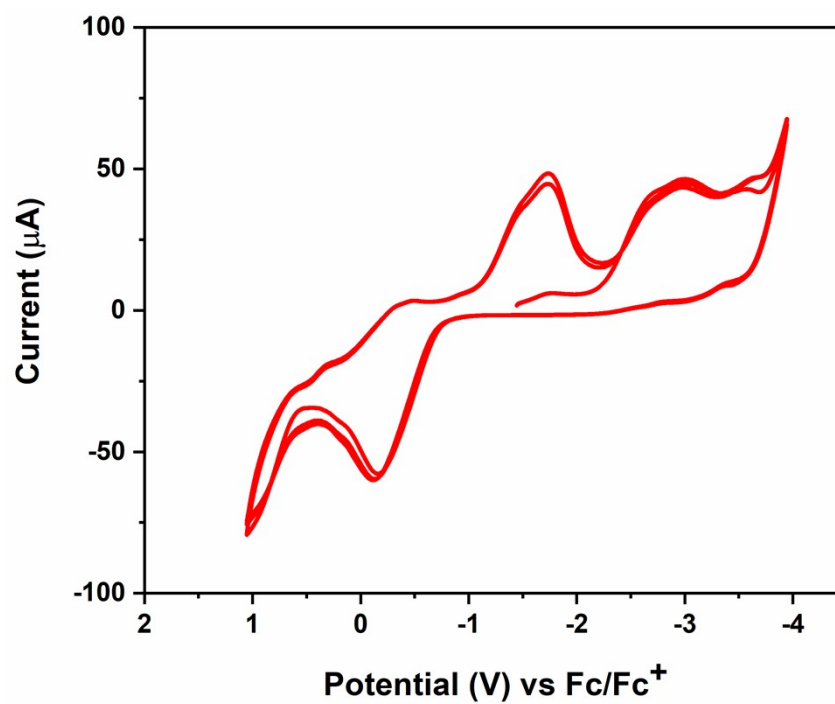

**Figure 9:** Cyclic Voltammogram at 700 mV scan rate.

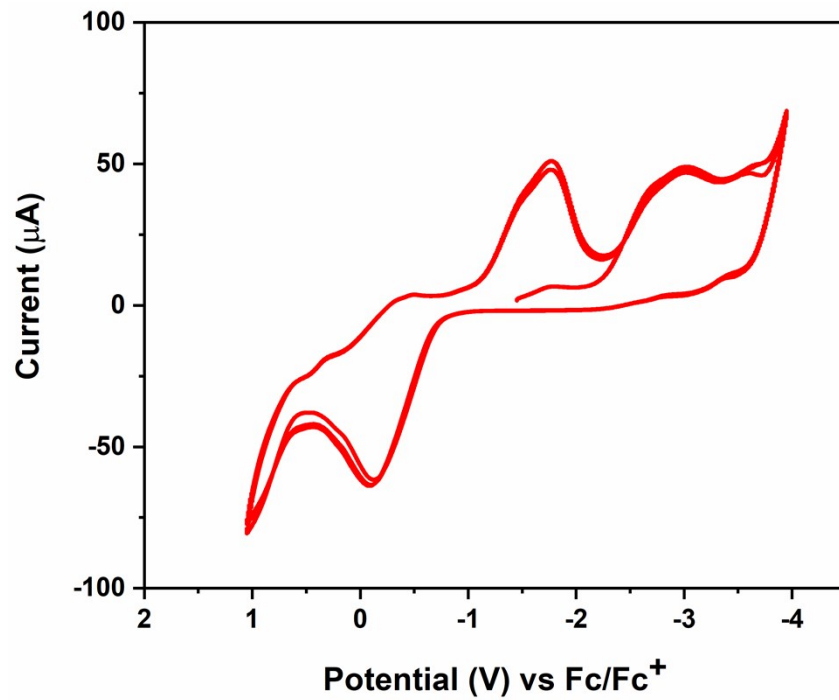

**Figure 10:** Cyclic Voltammogram at 800 mV scan rate.

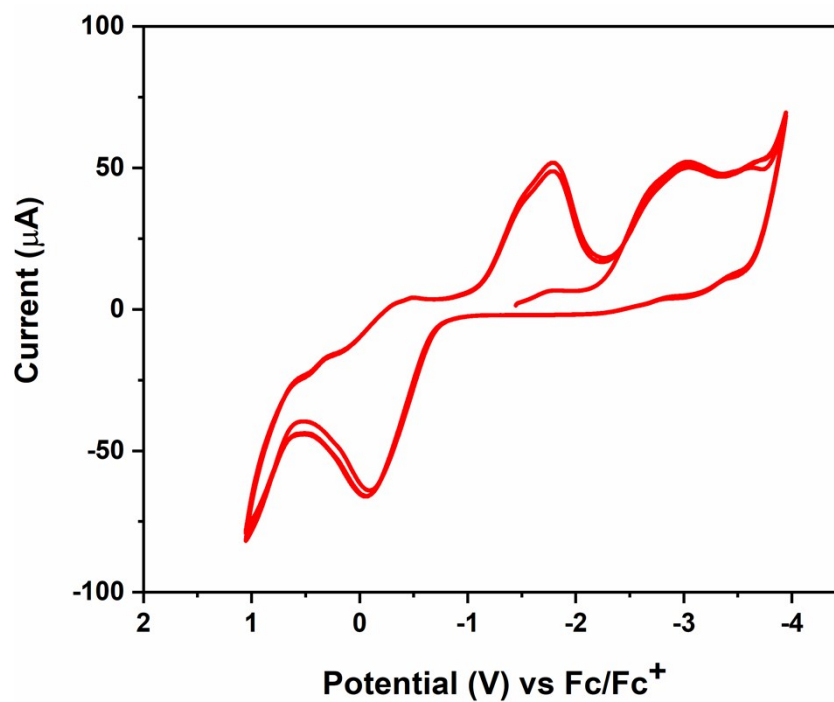

**Figure 11:** Cyclic Voltammogram at 900 mV scan rate.

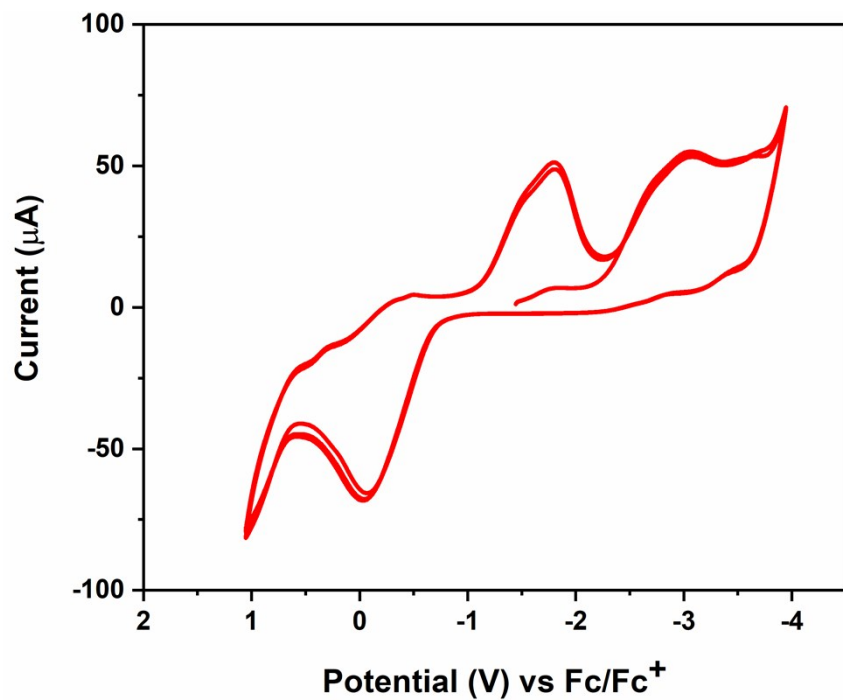

Figure 12: Cyclic Voltammogram at 1000 mV scan rate.

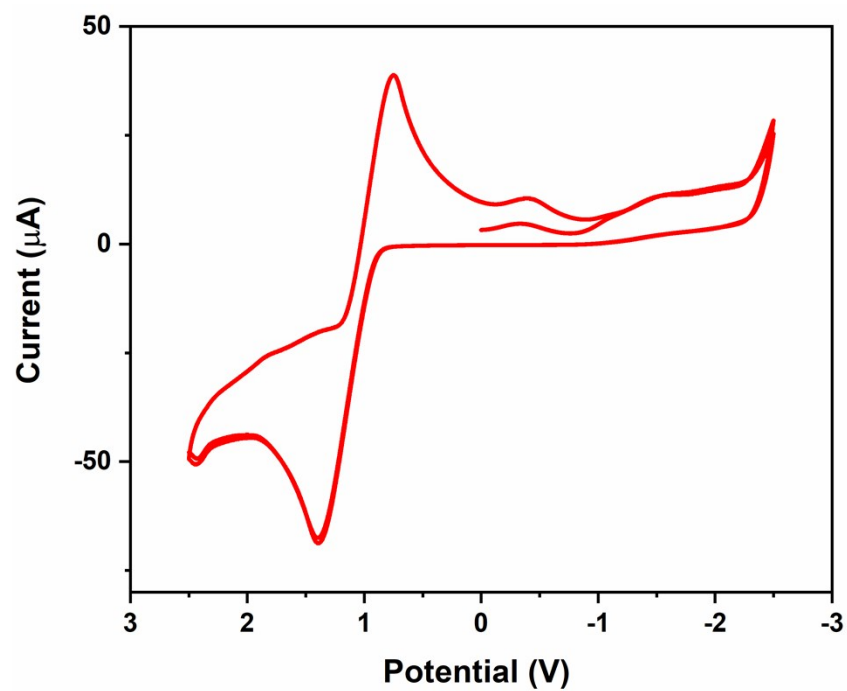

Figure 13: Cyclic Voltammogram + ferrocene at 100 mV scan rate.

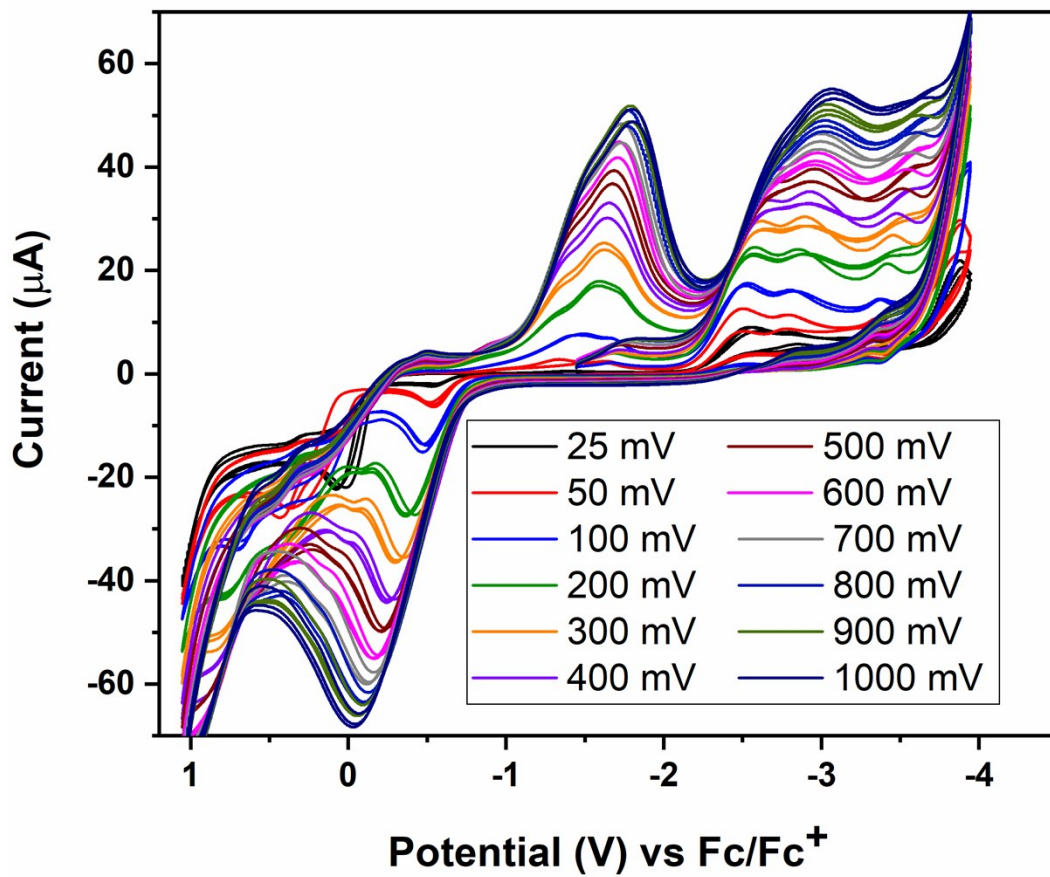

**Figure 14:** Overlay of Cyclic Voltammograms at varying scan rates



## 5. Experimental Details for Crystal Structure Refinement and Acquisition

Full crystallographic descriptions of the structure determinations are provided in the Supporting Information. Data for all three structures were collected at 100K using Bruker diffractometers with rotating-anode sources and micro-focus optics. Standard data collection procedures and data processing programs were employed. For **4**, the halogen site was refined as 75% I and 25% Cl with fixed P-X distances. For **3**, highly disordered pentane was treated as a diffuse contribution using the program SQUEEZE (found: 73e/unit cell; req: for two mol. pentane, 84 e/unit cell). For structures **5-p-MeC<sub>6</sub>H<sub>4</sub>**, **6-Pd<sub>2</sub>-(P(*t*-Bu)<sub>3</sub>)<sub>2</sub>**, and **7(O)**, all three structures were determined using a Bruker Ultra, mini-rotating-anode diffractometer with a microfocus mirror collimator. Details for each are provided in the SI tables. In all cases, standard methods were used throughout. OLEX2 (Dolomanov, O.V.; Bourhis, L.J.; Gildea, R.J.; Howard, J.A.K.; Puschmann, H., OLEX2: A complete structure solution, refinement and analysis program (2009). *J. Appl. Cryst.*, 42, 339-341) software was used for structure refinement and data processing. The structure of **92** revealed compositional disorder resulting in a 62/38 ratio of phosphine and phosphine oxide.

Table 1. Crystal data and structure refinement for cain71\_0m\_a (Compound **2**).

|                                   |                                             |                  |
|-----------------------------------|---------------------------------------------|------------------|
| Identification code               | PMA 343                                     |                  |
| Empirical formula                 | C <sub>19</sub> H <sub>23</sub> Cl N P      |                  |
| Formula weight                    | 331.80                                      |                  |
| Temperature                       | 100.0 K                                     |                  |
| Wavelength                        | 1.54178 Å                                   |                  |
| Crystal system                    | Monoclinic                                  |                  |
| Space group                       | P 21/c                                      |                  |
| Unit cell dimensions              | a = 11.7432(6) Å                            | α = 90°.         |
|                                   | b = 10.4564(5) Å                            | β = 105.441(3)°. |
|                                   | c = 15.0518(11) Å                           | γ = 90°.         |
| Volume                            | 1781.52(18) Å <sup>3</sup>                  |                  |
| Z                                 | 4                                           |                  |
| Density (calculated)              | 1.237 Mg/m <sup>3</sup>                     |                  |
| Absorption coefficient            | 2.698 mm <sup>-1</sup>                      |                  |
| F(000)                            | 704                                         |                  |
| Crystal size                      | 0.33 x 0.29 x 0.27 mm <sup>3</sup>          |                  |
| Theta range for data collection   | 3.905 to 70.234°.                           |                  |
| Index ranges                      | -14 ≤ h ≤ 13, -12 ≤ k ≤ 12, -16 ≤ l ≤ 18    |                  |
| Reflections collected             | 14613                                       |                  |
| Independent reflections           | 3381 [R(int) = 0.0472]                      |                  |
| Completeness to theta = 67.679°   | 99.7 %                                      |                  |
| Absorption correction             | Semi-empirical from equivalents             |                  |
| Max. and min. transmission        | 0.7533 and 0.6188                           |                  |
| Refinement method                 | Full-matrix least-squares on F <sup>2</sup> |                  |
| Data / restraints / parameters    | 3381 / 0 / 203                              |                  |
| Goodness-of-fit on F <sup>2</sup> | 1.045                                       |                  |
| Final R indices [I > 2σ(I)]       | R1 = 0.0471, wR2 = 0.1232                   |                  |
| R indices (all data)              | R1 = 0.0497, wR2 = 0.1256                   |                  |
| Extinction coefficient            | n/a                                         |                  |
| Largest diff. peak and hole       | 1.147 and -0.380 e.Å <sup>-3</sup>          |                  |

Table 2. Atomic coordinates ( $\times 10^4$ ) and equivalent isotropic displacement parameters ( $\text{\AA}^2 \times 10^3$ ) for cain71\_0m\_a.  $U(\text{eq})$  is defined as one third of the trace of the orthogonalized  $U^{ij}$  tensor.

|       | x       | y       | z       | $U(\text{eq})$ |
|-------|---------|---------|---------|----------------|
| Cl(1) | 8604(1) | 5650(1) | 5393(1) | 30(1)          |
| P(1)  | 7040(1) | 4785(1) | 4499(1) | 19(1)          |
| N(1)  | 7347(1) | 4540(2) | 3492(1) | 16(1)          |
| C(1)  | 8014(2) | 3370(2) | 3387(1) | 19(1)          |
| C(2)  | 7938(2) | 2531(2) | 4191(1) | 16(1)          |
| C(3)  | 8304(2) | 1261(2) | 4324(1) | 20(1)          |
| C(4)  | 8119(2) | 598(2)  | 5073(1) | 23(1)          |
| C(5)  | 7587(2) | 1190(2) | 5688(1) | 25(1)          |
| C(6)  | 7251(2) | 2467(2) | 5574(1) | 22(1)          |
| C(7)  | 7433(2) | 3135(2) | 4820(1) | 17(1)          |
| C(8)  | 6944(2) | 5366(2) | 2705(1) | 15(1)          |
| C(9)  | 7733(2) | 6239(2) | 2476(1) | 17(1)          |
| C(10) | 7319(2) | 6984(2) | 1684(1) | 20(1)          |
| C(11) | 6165(2) | 6884(2) | 1146(1) | 22(1)          |
| C(12) | 5396(2) | 6028(2) | 1386(1) | 20(1)          |
| C(13) | 5770(2) | 5246(2) | 2165(1) | 17(1)          |
| C(14) | 8990(2) | 6407(2) | 3063(2) | 21(1)          |
| C(15) | 9884(2) | 6197(3) | 2498(2) | 33(1)          |
| C(16) | 9151(2) | 7738(2) | 3511(2) | 35(1)          |
| C(17) | 4896(2) | 4318(2) | 2401(1) | 20(1)          |
| C(18) | 3990(2) | 5060(2) | 2772(2) | 27(1)          |
| C(19) | 4285(2) | 3482(2) | 1576(2) | 26(1)          |

Table 3. Bond lengths [Å] and angles [°] for cain71\_0m\_a.

---

|              |            |
|--------------|------------|
| Cl(1)-P(1)   | 2.1649(8)  |
| P(1)-N(1)    | 1.6681(16) |
| P(1)-C(7)    | 1.818(2)   |
| N(1)-C(1)    | 1.485(3)   |
| N(1)-C(8)    | 1.440(2)   |
| C(1)-H(1A)   | 0.9900     |
| C(1)-H(1B)   | 0.9900     |
| C(1)-C(2)    | 1.517(3)   |
| C(2)-C(3)    | 1.394(3)   |
| C(2)-C(7)    | 1.395(3)   |
| C(3)-H(3)    | 0.9500     |
| C(3)-C(4)    | 1.389(3)   |
| C(4)-H(4)    | 0.9500     |
| C(4)-C(5)    | 1.392(3)   |
| C(5)-H(5)    | 0.9500     |
| C(5)-C(6)    | 1.391(3)   |
| C(6)-H(6)    | 0.9500     |
| C(6)-C(7)    | 1.396(3)   |
| C(8)-C(9)    | 1.408(3)   |
| C(8)-C(13)   | 1.408(3)   |
| C(9)-C(10)   | 1.399(3)   |
| C(9)-C(14)   | 1.515(3)   |
| C(10)-H(10)  | 0.9500     |
| C(10)-C(11)  | 1.385(3)   |
| C(11)-H(11)  | 0.9500     |
| C(11)-C(12)  | 1.386(3)   |
| C(12)-H(12)  | 0.9500     |
| C(12)-C(13)  | 1.400(3)   |
| C(13)-C(17)  | 1.521(3)   |
| C(14)-H(14)  | 1.0000     |
| C(14)-C(15)  | 1.533(3)   |
| C(14)-C(16)  | 1.536(3)   |
| C(15)-H(15A) | 0.9800     |
| C(15)-H(15B) | 0.9800     |

|                  |            |
|------------------|------------|
| C(15)-H(15C)     | 0.9800     |
| C(16)-H(16A)     | 0.9800     |
| C(16)-H(16B)     | 0.9800     |
| C(16)-H(16C)     | 0.9800     |
| C(17)-H(17)      | 1.0000     |
| C(17)-C(18)      | 1.538(3)   |
| C(17)-C(19)      | 1.532(3)   |
| C(18)-H(18A)     | 0.9800     |
| C(18)-H(18B)     | 0.9800     |
| C(18)-H(18C)     | 0.9800     |
| C(19)-H(19A)     | 0.9800     |
| C(19)-H(19B)     | 0.9800     |
| C(19)-H(19C)     | 0.9800     |
|                  |            |
| N(1)-P(1)-Cl(1)  | 106.02(6)  |
| N(1)-P(1)-C(7)   | 89.74(9)   |
| C(7)-P(1)-Cl(1)  | 96.76(6)   |
| C(1)-N(1)-P(1)   | 118.12(13) |
| C(8)-N(1)-P(1)   | 123.57(13) |
| C(8)-N(1)-C(1)   | 118.22(15) |
| N(1)-C(1)-H(1A)  | 110.9      |
| N(1)-C(1)-H(1B)  | 110.9      |
| N(1)-C(1)-C(2)   | 104.27(16) |
| H(1A)-C(1)-H(1B) | 108.9      |
| C(2)-C(1)-H(1A)  | 110.9      |
| C(2)-C(1)-H(1B)  | 110.9      |
| C(3)-C(2)-C(1)   | 125.74(18) |
| C(3)-C(2)-C(7)   | 120.29(18) |
| C(7)-C(2)-C(1)   | 113.96(18) |
| C(2)-C(3)-H(3)   | 120.6      |
| C(4)-C(3)-C(2)   | 118.88(19) |
| C(4)-C(3)-H(3)   | 120.6      |
| C(3)-C(4)-H(4)   | 119.6      |
| C(3)-C(4)-C(5)   | 120.9(2)   |
| C(5)-C(4)-H(4)   | 119.6      |
| C(4)-C(5)-H(5)   | 119.8      |

|                     |            |
|---------------------|------------|
| C(6)-C(5)-C(4)      | 120.5(2)   |
| C(6)-C(5)-H(5)      | 119.8      |
| C(5)-C(6)-H(6)      | 120.6      |
| C(5)-C(6)-C(7)      | 118.8(2)   |
| C(7)-C(6)-H(6)      | 120.6      |
| C(2)-C(7)-P(1)      | 111.88(15) |
| C(6)-C(7)-P(1)      | 127.46(16) |
| C(6)-C(7)-C(2)      | 120.64(19) |
| C(9)-C(8)-N(1)      | 119.77(17) |
| C(9)-C(8)-C(13)     | 121.60(18) |
| C(13)-C(8)-N(1)     | 118.60(17) |
| C(8)-C(9)-C(14)     | 122.36(18) |
| C(10)-C(9)-C(8)     | 117.87(18) |
| C(10)-C(9)-C(14)    | 119.76(18) |
| C(9)-C(10)-H(10)    | 119.3      |
| C(11)-C(10)-C(9)    | 121.34(19) |
| C(11)-C(10)-H(10)   | 119.3      |
| C(10)-C(11)-H(11)   | 120.0      |
| C(10)-C(11)-C(12)   | 120.05(19) |
| C(12)-C(11)-H(11)   | 120.0      |
| C(11)-C(12)-H(12)   | 119.5      |
| C(11)-C(12)-C(13)   | 120.94(19) |
| C(13)-C(12)-H(12)   | 119.5      |
| C(8)-C(13)-C(17)    | 122.63(18) |
| C(12)-C(13)-C(8)    | 118.19(18) |
| C(12)-C(13)-C(17)   | 119.17(18) |
| C(9)-C(14)-H(14)    | 108.2      |
| C(9)-C(14)-C(15)    | 111.38(18) |
| C(9)-C(14)-C(16)    | 110.33(18) |
| C(15)-C(14)-H(14)   | 108.2      |
| C(15)-C(14)-C(16)   | 110.5(2)   |
| C(16)-C(14)-H(14)   | 108.2      |
| C(14)-C(15)-H(15A)  | 109.5      |
| C(14)-C(15)-H(15B)  | 109.5      |
| C(14)-C(15)-H(15C)  | 109.5      |
| H(15A)-C(15)-H(15B) | 109.5      |

|                     |            |
|---------------------|------------|
| H(15A)-C(15)-H(15C) | 109.5      |
| H(15B)-C(15)-H(15C) | 109.5      |
| C(14)-C(16)-H(16A)  | 109.5      |
| C(14)-C(16)-H(16B)  | 109.5      |
| C(14)-C(16)-H(16C)  | 109.5      |
| H(16A)-C(16)-H(16B) | 109.5      |
| H(16A)-C(16)-H(16C) | 109.5      |
| H(16B)-C(16)-H(16C) | 109.5      |
| C(13)-C(17)-H(17)   | 107.9      |
| C(13)-C(17)-C(18)   | 109.74(17) |
| C(13)-C(17)-C(19)   | 111.97(17) |
| C(18)-C(17)-H(17)   | 107.9      |
| C(19)-C(17)-H(17)   | 107.9      |
| C(19)-C(17)-C(18)   | 111.24(17) |
| C(17)-C(18)-H(18A)  | 109.5      |
| C(17)-C(18)-H(18B)  | 109.5      |
| C(17)-C(18)-H(18C)  | 109.5      |
| H(18A)-C(18)-H(18B) | 109.5      |
| H(18A)-C(18)-H(18C) | 109.5      |
| H(18B)-C(18)-H(18C) | 109.5      |
| C(17)-C(19)-H(19A)  | 109.5      |
| C(17)-C(19)-H(19B)  | 109.5      |
| C(17)-C(19)-H(19C)  | 109.5      |
| H(19A)-C(19)-H(19B) | 109.5      |
| H(19A)-C(19)-H(19C) | 109.5      |
| H(19B)-C(19)-H(19C) | 109.5      |

---

Symmetry transformations used to generate equivalent atoms:

Table 4. Anisotropic displacement parameters ( $\text{\AA}^2 \times 10^3$ ) for cain71\_0m\_a. The anisotropic displacement factor exponent takes the form:  $-2\pi^2 [ h^2 a^{*2} U^{11} + \dots + 2 h k a^* b^* U^{12} ]$

|       | U <sup>11</sup> | U <sup>22</sup> | U <sup>33</sup> | U <sup>23</sup> | U <sup>13</sup> | U <sup>12</sup> |
|-------|-----------------|-----------------|-----------------|-----------------|-----------------|-----------------|
| Cl(1) | 35(1)           | 27(1)           | 25(1)           | -8(1)           | 4(1)            | -1(1)           |
| P(1)  | 20(1)           | 21(1)           | 18(1)           | 0(1)            | 7(1)            | 4(1)            |
| N(1)  | 17(1)           | 14(1)           | 15(1)           | 1(1)            | 4(1)            | 2(1)            |
| C(1)  | 28(1)           | 12(1)           | 14(1)           | 2(1)            | 3(1)            | 0(1)            |
| C(2)  | 16(1)           | 18(1)           | 15(1)           | -1(1)           | 2(1)            | -3(1)           |
| C(3)  | 20(1)           | 17(1)           | 21(1)           | -3(1)           | 4(1)            | -2(1)           |
| C(4)  | 25(1)           | 15(1)           | 23(1)           | 2(1)            | -2(1)           | -4(1)           |
| C(5)  | 26(1)           | 27(1)           | 20(1)           | 6(1)            | 3(1)            | -7(1)           |
| C(6)  | 23(1)           | 26(1)           | 18(1)           | 0(1)            | 7(1)            | -3(1)           |
| C(7)  | 15(1)           | 19(1)           | 17(1)           | -1(1)           | 2(1)            | -2(1)           |
| C(8)  | 17(1)           | 13(1)           | 14(1)           | -1(1)           | 4(1)            | 2(1)            |
| C(9)  | 19(1)           | 13(1)           | 20(1)           | -3(1)           | 7(1)            | 0(1)            |
| C(10) | 24(1)           | 15(1)           | 24(1)           | 1(1)            | 11(1)           | -2(1)           |
| C(11) | 29(1)           | 16(1)           | 21(1)           | 5(1)            | 6(1)            | 2(1)            |
| C(12) | 18(1)           | 18(1)           | 21(1)           | 2(1)            | 0(1)            | 1(1)            |
| C(13) | 18(1)           | 13(1)           | 20(1)           | 1(1)            | 6(1)            | 1(1)            |
| C(14) | 17(1)           | 21(1)           | 26(1)           | -1(1)           | 7(1)            | -3(1)           |
| C(15) | 21(1)           | 45(2)           | 36(1)           | 1(1)            | 12(1)           | 1(1)            |
| C(16) | 26(1)           | 29(1)           | 45(1)           | -13(1)          | 2(1)            | -9(1)           |
| C(17) | 17(1)           | 17(1)           | 25(1)           | 3(1)            | 4(1)            | -1(1)           |
| C(18) | 22(1)           | 25(1)           | 36(1)           | 1(1)            | 11(1)           | -1(1)           |
| C(19) | 22(1)           | 21(1)           | 32(1)           | -1(1)           | 3(1)            | -4(1)           |

Table 5. Hydrogen coordinates ( $\times 10^4$ ) and isotropic displacement parameters ( $\text{\AA}^2 \times 10^{-3}$ ) for cain71\_0m\_a.

|        | x     | y    | z    | U(eq) |
|--------|-------|------|------|-------|
| H(1A)  | 8846  | 3578 | 3418 | 23    |
| H(1B)  | 7651  | 2942 | 2792 | 23    |
| H(3)   | 8674  | 856  | 3909 | 24    |
| H(4)   | 8358  | -270 | 5167 | 27    |
| H(5)   | 7452  | 717  | 6190 | 30    |
| H(6)   | 6905  | 2878 | 6001 | 26    |
| H(10)  | 7839  | 7571 | 1511 | 24    |
| H(11)  | 5900  | 7402 | 613  | 27    |
| H(12)  | 4603  | 5971 | 1017 | 24    |
| H(14)  | 9142  | 5753 | 3566 | 25    |
| H(15A) | 9778  | 5339 | 2226 | 50    |
| H(15B) | 10688 | 6279 | 2901 | 50    |
| H(15C) | 9759  | 6838 | 2007 | 50    |
| H(16A) | 9035  | 8393 | 3029 | 52    |
| H(16B) | 9950  | 7811 | 3922 | 52    |
| H(16C) | 8570  | 7858 | 3865 | 52    |
| H(17)  | 5346  | 3741 | 2902 | 24    |
| H(18A) | 4394  | 5486 | 3350 | 40    |
| H(18B) | 3398  | 4465 | 2885 | 40    |
| H(18C) | 3599  | 5702 | 2318 | 40    |
| H(19A) | 3807  | 4023 | 1085 | 39    |
| H(19B) | 3774  | 2858 | 1767 | 39    |
| H(19C) | 4883  | 3031 | 1348 | 39    |



Table 1. Crystal data and structure refinement for cain79\_0m\_a\_sq (Compound 3).

|                                   |                                             |                  |
|-----------------------------------|---------------------------------------------|------------------|
| Identification code               | DYZ9                                        |                  |
| Empirical formula                 | C <sub>27</sub> H <sub>28</sub> N P         |                  |
| Formula weight                    | 397.47                                      |                  |
| Temperature                       | 100.0 K                                     |                  |
| Wavelength                        | 0.71073 Å                                   |                  |
| Crystal system                    | Triclinic                                   |                  |
| Space group                       | P-1                                         |                  |
| Unit cell dimensions              | a = 8.4342(5) Å                             | α = 97.641(2)°.  |
|                                   | b = 10.7526(6) Å                            | β = 103.063(2)°. |
|                                   | c = 14.1948(8) Å                            | γ = 90.538(2)°.  |
| Volume                            | 1241.83(12) Å <sup>3</sup>                  |                  |
| Z                                 | 2                                           |                  |
| Density (calculated)              | 1.063 Mg/m <sup>3</sup>                     |                  |
| Absorption coefficient            | 0.122 mm <sup>-1</sup>                      |                  |
| F(000)                            | 424                                         |                  |
| Crystal size                      | 0.26 x 0.25 x 0.22 mm <sup>3</sup>          |                  |
| Theta range for data collection   | 1.487 to 28.357°.                           |                  |
| Index ranges                      | -11 ≤ h ≤ 11, -14 ≤ k ≤ 14, -18 ≤ l ≤ 18    |                  |
| Reflections collected             | 15194                                       |                  |
| Independent reflections           | 6203 [R(int) = 0.0942]                      |                  |
| Completeness to theta = 25.242°   | 100.0 %                                     |                  |
| Absorption correction             | Semi-empirical from equivalents             |                  |
| Max. and min. transmission        | 0.777 and 0.706                             |                  |
| Refinement method                 | Full-matrix least-squares on F <sup>2</sup> |                  |
| Data / restraints / parameters    | 6203 / 0 / 266                              |                  |
| Goodness-of-fit on F <sup>2</sup> | 0.986                                       |                  |
| Final R indices [I > 2σ(I)]       | R1 = 0.0540, wR2 = 0.1434                   |                  |
| R indices (all data)              | R1 = 0.0784, wR2 = 0.1567                   |                  |
| Extinction coefficient            | n/a                                         |                  |
| Largest diff. peak and hole       | 0.673 and -0.434 e.Å <sup>-3</sup>          |                  |

Table 2. Atomic coordinates ( $\times 10^4$ ) and equivalent isotropic displacement parameters ( $\text{\AA}^2 \times 10^3$ ) for cain79\_0m\_a\_sq.  $U(\text{eq})$  is defined as one third of the trace of the orthogonalized  $U^{ij}$  tensor.

|       | x        | y        | z       | $U(\text{eq})$ |
|-------|----------|----------|---------|----------------|
| P(1)  | 6908(1)  | 5047(1)  | 7908(1) | 18(1)          |
| N(1)  | 8525(2)  | 4737(1)  | 7398(1) | 17(1)          |
| C(16) | 10174(2) | 5004(2)  | 7944(1) | 17(1)          |
| C(17) | 11005(2) | 6110(2)  | 7867(1) | 19(1)          |
| C(14) | 6388(2)  | 3967(2)  | 6052(1) | 19(1)          |
| C(9)  | 5540(2)  | 4309(2)  | 6776(1) | 18(1)          |
| C(21) | 10930(2) | 4148(2)  | 8564(1) | 21(1)          |
| C(10) | 3872(2)  | 4077(2)  | 6598(1) | 22(1)          |
| C(22) | 10244(2) | 7044(2)  | 7204(1) | 21(1)          |
| C(7)  | 6274(2)  | 7783(2)  | 7953(2) | 25(1)          |
| C(6)  | 6040(2)  | 9112(2)  | 8102(2) | 28(1)          |
| C(25) | 10070(2) | 2956(2)  | 8677(1) | 26(1)          |
| C(19) | 13355(2) | 5523(2)  | 9022(2) | 30(1)          |
| C(20) | 12511(2) | 4433(2)  | 9096(1) | 28(1)          |
| C(18) | 12601(2) | 6347(2)  | 8409(1) | 24(1)          |
| C(8)  | 6479(2)  | 6665(2)  | 7828(1) | 22(1)          |
| C(15) | 8193(2)  | 4290(2)  | 6352(1) | 22(1)          |
| C(11) | 3054(2)  | 3504(2)  | 5683(2) | 26(1)          |
| C(13) | 5551(2)  | 3392(2)  | 5132(1) | 25(1)          |
| C(12) | 3892(2)  | 3166(2)  | 4956(2) | 27(1)          |
| C(24) | 10320(3) | 8378(2)  | 7764(2) | 30(1)          |
| C(23) | 11062(3) | 7041(2)  | 6346(1) | 29(1)          |
| C(3)  | 5616(3)  | 11685(2) | 8373(2) | 48(1)          |
| C(5)  | 6242(3)  | 9766(2)  | 9014(2) | 49(1)          |
| C(4)  | 6019(4)  | 11047(2) | 9150(2) | 55(1)          |
| C(27) | 9855(3)  | 2975(2)  | 9705(2) | 51(1)          |
| C(1)  | 5662(4)  | 9771(2)  | 7309(2) | 65(1)          |
| C(26) | 11042(4) | 1799(2)  | 8426(2) | 70(1)          |
| C(2)  | 5476(4)  | 11065(3) | 7459(2) | 74(1)          |

Table 3. Bond lengths [Å] and angles [°] for cain79\_0m\_a\_sq.

---

|              |            |
|--------------|------------|
| P(1)-N(1)    | 1.6986(15) |
| P(1)-C(9)    | 1.8305(18) |
| P(1)-C(8)    | 1.7932(19) |
| N(1)-C(16)   | 1.437(2)   |
| N(1)-C(15)   | 1.461(2)   |
| C(16)-C(17)  | 1.404(2)   |
| C(16)-C(21)  | 1.414(2)   |
| C(17)-C(22)  | 1.516(2)   |
| C(17)-C(18)  | 1.393(3)   |
| C(14)-C(9)   | 1.393(3)   |
| C(14)-C(15)  | 1.509(3)   |
| C(14)-C(13)  | 1.395(3)   |
| C(9)-C(10)   | 1.386(3)   |
| C(21)-C(25)  | 1.511(3)   |
| C(21)-C(20)  | 1.385(3)   |
| C(10)-H(10)  | 0.9500     |
| C(10)-C(11)  | 1.384(3)   |
| C(22)-H(22)  | 1.0000     |
| C(22)-C(24)  | 1.538(3)   |
| C(22)-C(23)  | 1.528(3)   |
| C(7)-C(6)    | 1.438(3)   |
| C(7)-C(8)    | 1.212(3)   |
| C(6)-C(5)    | 1.361(3)   |
| C(6)-C(1)    | 1.389(3)   |
| C(25)-H(25)  | 1.0000     |
| C(25)-C(27)  | 1.509(3)   |
| C(25)-C(26)  | 1.543(3)   |
| C(19)-H(19)  | 0.9500     |
| C(19)-C(20)  | 1.394(3)   |
| C(19)-C(18)  | 1.383(3)   |
| C(20)-H(20)  | 0.9500     |
| C(18)-H(18)  | 0.9500     |
| C(15)-H(15A) | 0.9900     |
| C(15)-H(15B) | 0.9900     |

|                   |            |
|-------------------|------------|
| C(11)-H(11)       | 0.9500     |
| C(11)-C(12)       | 1.389(3)   |
| C(13)-H(13)       | 0.9500     |
| C(13)-C(12)       | 1.378(3)   |
| C(12)-H(12)       | 0.9500     |
| C(24)-H(24A)      | 0.9800     |
| C(24)-H(24B)      | 0.9800     |
| C(24)-H(24C)      | 0.9800     |
| C(23)-H(23A)      | 0.9800     |
| C(23)-H(23B)      | 0.9800     |
| C(23)-H(23C)      | 0.9800     |
| C(3)-H(3)         | 0.9500     |
| C(3)-C(4)         | 1.356(4)   |
| C(3)-C(2)         | 1.357(4)   |
| C(5)-H(5)         | 0.9500     |
| C(5)-C(4)         | 1.386(3)   |
| C(4)-H(4)         | 0.9500     |
| C(27)-H(27A)      | 0.9800     |
| C(27)-H(27B)      | 0.9800     |
| C(27)-H(27C)      | 0.9800     |
| C(1)-H(1)         | 0.9500     |
| C(1)-C(2)         | 1.395(3)   |
| C(26)-H(26A)      | 0.9800     |
| C(26)-H(26B)      | 0.9800     |
| C(26)-H(26C)      | 0.9800     |
| C(2)-H(2)         | 0.9500     |
|                   |            |
| N(1)-P(1)-C(9)    | 89.64(8)   |
| N(1)-P(1)-C(8)    | 106.70(8)  |
| C(8)-P(1)-C(9)    | 99.89(8)   |
| C(16)-N(1)-P(1)   | 121.93(11) |
| C(16)-N(1)-C(15)  | 120.02(14) |
| C(15)-N(1)-P(1)   | 117.82(12) |
| C(17)-C(16)-N(1)  | 119.93(15) |
| C(17)-C(16)-C(21) | 120.99(16) |
| C(21)-C(16)-N(1)  | 119.08(16) |

|                   |            |
|-------------------|------------|
| C(16)-C(17)-C(22) | 122.57(16) |
| C(18)-C(17)-C(16) | 118.68(16) |
| C(18)-C(17)-C(22) | 118.74(17) |
| C(9)-C(14)-C(15)  | 114.70(16) |
| C(9)-C(14)-C(13)  | 119.80(17) |
| C(13)-C(14)-C(15) | 125.48(17) |
| C(14)-C(9)-P(1)   | 111.26(14) |
| C(10)-C(9)-P(1)   | 127.91(15) |
| C(10)-C(9)-C(14)  | 120.84(17) |
| C(16)-C(21)-C(25) | 122.58(16) |
| C(20)-C(21)-C(16) | 118.10(17) |
| C(20)-C(21)-C(25) | 119.31(16) |
| C(9)-C(10)-H(10)  | 120.5      |
| C(11)-C(10)-C(9)  | 118.92(18) |
| C(11)-C(10)-H(10) | 120.5      |
| C(17)-C(22)-H(22) | 108.0      |
| C(17)-C(22)-C(24) | 111.66(15) |
| C(17)-C(22)-C(23) | 110.89(15) |
| C(24)-C(22)-H(22) | 108.0      |
| C(23)-C(22)-H(22) | 108.0      |
| C(23)-C(22)-C(24) | 110.20(15) |
| C(8)-C(7)-C(6)    | 179.7(2)   |
| C(5)-C(6)-C(7)    | 121.7(2)   |
| C(5)-C(6)-C(1)    | 118.1(2)   |
| C(1)-C(6)-C(7)    | 120.1(2)   |
| C(21)-C(25)-H(25) | 108.8      |
| C(21)-C(25)-C(26) | 110.62(19) |
| C(27)-C(25)-C(21) | 111.40(16) |
| C(27)-C(25)-H(25) | 108.8      |
| C(27)-C(25)-C(26) | 108.5(2)   |
| C(26)-C(25)-H(25) | 108.8      |
| C(20)-C(19)-H(19) | 120.2      |
| C(18)-C(19)-H(19) | 120.2      |
| C(18)-C(19)-C(20) | 119.52(18) |
| C(21)-C(20)-C(19) | 121.60(18) |
| C(21)-C(20)-H(20) | 119.2      |

|                     |            |
|---------------------|------------|
| C(19)-C(20)-H(20)   | 119.2      |
| C(17)-C(18)-H(18)   | 119.4      |
| C(19)-C(18)-C(17)   | 121.11(18) |
| C(19)-C(18)-H(18)   | 119.4      |
| C(7)-C(8)-P(1)      | 168.38(18) |
| N(1)-C(15)-C(14)    | 105.40(15) |
| N(1)-C(15)-H(15A)   | 110.7      |
| N(1)-C(15)-H(15B)   | 110.7      |
| C(14)-C(15)-H(15A)  | 110.7      |
| C(14)-C(15)-H(15B)  | 110.7      |
| H(15A)-C(15)-H(15B) | 108.8      |
| C(10)-C(11)-H(11)   | 119.8      |
| C(10)-C(11)-C(12)   | 120.49(18) |
| C(12)-C(11)-H(11)   | 119.8      |
| C(14)-C(13)-H(13)   | 120.4      |
| C(12)-C(13)-C(14)   | 119.17(18) |
| C(12)-C(13)-H(13)   | 120.4      |
| C(11)-C(12)-H(12)   | 119.6      |
| C(13)-C(12)-C(11)   | 120.78(18) |
| C(13)-C(12)-H(12)   | 119.6      |
| C(22)-C(24)-H(24A)  | 109.5      |
| C(22)-C(24)-H(24B)  | 109.5      |
| C(22)-C(24)-H(24C)  | 109.5      |
| H(24A)-C(24)-H(24B) | 109.5      |
| H(24A)-C(24)-H(24C) | 109.5      |
| H(24B)-C(24)-H(24C) | 109.5      |
| C(22)-C(23)-H(23A)  | 109.5      |
| C(22)-C(23)-H(23B)  | 109.5      |
| C(22)-C(23)-H(23C)  | 109.5      |
| H(23A)-C(23)-H(23B) | 109.5      |
| H(23A)-C(23)-H(23C) | 109.5      |
| H(23B)-C(23)-H(23C) | 109.5      |
| C(4)-C(3)-H(3)      | 120.3      |
| C(4)-C(3)-C(2)      | 119.4(2)   |
| C(2)-C(3)-H(3)      | 120.3      |
| C(6)-C(5)-H(5)      | 119.4      |

|                     |          |
|---------------------|----------|
| C(6)-C(5)-C(4)      | 121.3(2) |
| C(4)-C(5)-H(5)      | 119.4    |
| C(3)-C(4)-C(5)      | 120.5(2) |
| C(3)-C(4)-H(4)      | 119.8    |
| C(5)-C(4)-H(4)      | 119.8    |
| C(25)-C(27)-H(27A)  | 109.5    |
| C(25)-C(27)-H(27B)  | 109.5    |
| C(25)-C(27)-H(27C)  | 109.5    |
| H(27A)-C(27)-H(27B) | 109.5    |
| H(27A)-C(27)-H(27C) | 109.5    |
| H(27B)-C(27)-H(27C) | 109.5    |
| C(6)-C(1)-H(1)      | 120.1    |
| C(6)-C(1)-C(2)      | 119.9(3) |
| C(2)-C(1)-H(1)      | 120.1    |
| C(25)-C(26)-H(26A)  | 109.5    |
| C(25)-C(26)-H(26B)  | 109.5    |
| C(25)-C(26)-H(26C)  | 109.5    |
| H(26A)-C(26)-H(26B) | 109.5    |
| H(26A)-C(26)-H(26C) | 109.5    |
| H(26B)-C(26)-H(26C) | 109.5    |
| C(3)-C(2)-C(1)      | 120.7(3) |
| C(3)-C(2)-H(2)      | 119.6    |
| C(1)-C(2)-H(2)      | 119.6    |

---

Symmetry transformations used to generate equivalent atoms:

Table 4. Anisotropic displacement parameters ( $\text{\AA}^2 \times 10^3$ ) for cain79\_0m\_a\_sq. The anisotropic displacement factor exponent takes the form:  $-2\pi^2 [ h^2 a^{*2} U^{11} + \dots + 2 h k a^* b^* U^{12} ]$

|       | U <sup>11</sup> | U <sup>22</sup> | U <sup>33</sup> | U <sup>23</sup> | U <sup>13</sup> | U <sup>12</sup> |
|-------|-----------------|-----------------|-----------------|-----------------|-----------------|-----------------|
| P(1)  | 18(1)           | 17(1)           | 20(1)           | 1(1)            | 4(1)            | 1(1)            |
| N(1)  | 14(1)           | 18(1)           | 17(1)           | -1(1)           | 1(1)            | 0(1)            |
| C(16) | 15(1)           | 18(1)           | 16(1)           | -1(1)           | 3(1)            | 1(1)            |
| C(17) | 18(1)           | 19(1)           | 18(1)           | -1(1)           | 6(1)            | 1(1)            |
| C(14) | 20(1)           | 13(1)           | 23(1)           | 3(1)            | 3(1)            | 2(1)            |
| C(9)  | 21(1)           | 11(1)           | 21(1)           | 3(1)            | 0(1)            | 1(1)            |
| C(21) | 20(1)           | 21(1)           | 19(1)           | 1(1)            | 2(1)            | 2(1)            |
| C(10) | 22(1)           | 16(1)           | 28(1)           | 4(1)            | 7(1)            | 2(1)            |
| C(22) | 21(1)           | 18(1)           | 23(1)           | 3(1)            | 6(1)            | 0(1)            |
| C(7)  | 16(1)           | 23(1)           | 34(1)           | 1(1)            | 8(1)            | -1(1)           |
| C(6)  | 22(1)           | 17(1)           | 46(1)           | 2(1)            | 9(1)            | 1(1)            |
| C(25) | 31(1)           | 18(1)           | 26(1)           | 4(1)            | 0(1)            | 1(1)            |
| C(19) | 17(1)           | 39(1)           | 29(1)           | 4(1)            | -2(1)           | -4(1)           |
| C(20) | 24(1)           | 34(1)           | 24(1)           | 7(1)            | -2(1)           | 4(1)            |
| C(18) | 20(1)           | 26(1)           | 24(1)           | 0(1)            | 6(1)            | -4(1)           |
| C(8)  | 18(1)           | 21(1)           | 26(1)           | -1(1)           | 6(1)            | 0(1)            |
| C(15) | 21(1)           | 23(1)           | 20(1)           | -1(1)           | 3(1)            | -2(1)           |
| C(11) | 18(1)           | 19(1)           | 35(1)           | 3(1)            | -1(1)           | -3(1)           |
| C(13) | 30(1)           | 20(1)           | 22(1)           | -2(1)           | 5(1)            | 0(1)            |
| C(12) | 28(1)           | 21(1)           | 26(1)           | -2(1)           | -4(1)           | -3(1)           |
| C(24) | 34(1)           | 21(1)           | 35(1)           | 2(1)            | 10(1)           | 0(1)            |
| C(23) | 34(1)           | 30(1)           | 26(1)           | 6(1)            | 9(1)            | -2(1)           |
| C(3)  | 50(2)           | 18(1)           | 78(2)           | 1(1)            | 21(1)           | 9(1)            |
| C(5)  | 72(2)           | 25(1)           | 47(2)           | 0(1)            | 14(1)           | 5(1)            |
| C(4)  | 75(2)           | 28(1)           | 60(2)           | -12(1)          | 23(2)           | 2(1)            |
| C(27) | 66(2)           | 53(2)           | 33(1)           | 2(1)            | 16(1)           | -30(1)          |
| C(1)  | 108(3)          | 30(1)           | 53(2)           | 4(1)            | 9(2)            | 26(2)           |
| C(26) | 86(2)           | 30(1)           | 100(3)          | -6(2)           | 43(2)           | 7(1)            |
| C(2)  | 121(3)          | 31(1)           | 69(2)           | 14(1)           | 16(2)           | 31(2)           |



Table 5. Hydrogen coordinates ( $\times 10^4$ ) and isotropic displacement parameters ( $\text{\AA}^2 \times 10^{-3}$ ) for cain79\_0m\_a\_sq.

|        | x     | y     | z     | U(eq) |
|--------|-------|-------|-------|-------|
| H(10)  | 3300  | 4306  | 7095  | 26    |
| H(22)  | 9072  | 6780  | 6934  | 25    |
| H(25)  | 8971  | 2875  | 8219  | 31    |
| H(19)  | 14442 | 5699  | 9390  | 35    |
| H(20)  | 13032 | 3873  | 9521  | 33    |
| H(18)  | 13180 | 7087  | 8356  | 28    |
| H(15A) | 8824  | 3541  | 6221  | 26    |
| H(15B) | 8483  | 4953  | 5991  | 26    |
| H(11)  | 1910  | 3340  | 5551  | 31    |
| H(13)  | 6118  | 3159  | 4632  | 30    |
| H(12)  | 3314  | 2775  | 4332  | 32    |
| H(24A) | 9840  | 8361  | 8330  | 44    |
| H(24B) | 9711  | 8936  | 7333  | 44    |
| H(24C) | 11459 | 8686  | 7986  | 44    |
| H(23A) | 12208 | 7321  | 6592  | 44    |
| H(23B) | 10508 | 7612  | 5907  | 44    |
| H(23C) | 10995 | 6190  | 5990  | 44    |
| H(3)   | 5432  | 12559 | 8468  | 58    |
| H(5)   | 6541  | 9337  | 9567  | 58    |
| H(4)   | 6150  | 11481 | 9793  | 66    |
| H(27A) | 10920 | 3112  | 10165 | 76    |
| H(27B) | 9360  | 2170  | 9767  | 76    |
| H(27C) | 9146  | 3655  | 9853  | 76    |
| H(1)   | 5529  | 9342  | 6664  | 78    |
| H(26A) | 11204 | 1780  | 7762  | 105   |
| H(26B) | 10436 | 1033  | 8467  | 105   |
| H(26C) | 12103 | 1849  | 8890  | 105   |
| H(2)   | 5250  | 11517 | 6915  | 89    |

Table 1. Crystal data and structure refinement for cain83\_0m\_a (Mixture of **4** and the Chloride).

|                                   |                                                                          |                  |
|-----------------------------------|--------------------------------------------------------------------------|------------------|
| Identification code               | DYZ-24                                                                   |                  |
| Empirical formula                 | C <sub>19</sub> H <sub>23</sub> Cl <sub>0.25</sub> I <sub>0.75</sub> N P |                  |
| Formula weight                    | 400.40                                                                   |                  |
| Temperature                       | 100.0 K                                                                  |                  |
| Wavelength                        | 0.71073 Å                                                                |                  |
| Crystal system                    | Monoclinic                                                               |                  |
| Space group                       | P 21/c                                                                   |                  |
| Unit cell dimensions              | a = 9.4221(5) Å                                                          | α = 90°.         |
|                                   | b = 9.8317(8) Å                                                          | β = 101.724(3)°. |
|                                   | c = 20.1049(12) Å                                                        | γ = 90°.         |
| Volume                            | 1823.6(2) Å <sup>3</sup>                                                 |                  |
| Z                                 | 4                                                                        |                  |
| Density (calculated)              | 1.458 Mg/m <sup>3</sup>                                                  |                  |
| Absorption coefficient            | 2.003 mm <sup>-1</sup>                                                   |                  |
| F(000)                            | 836                                                                      |                  |
| Crystal color, size               | Yellow, 0.25 x 0.24 x 0.22 mm <sup>3</sup>                               |                  |
| Theta range for data collection   | 2.069 to 28.345°.                                                        |                  |
| Index ranges                      | -11 ≤ h ≤ 12, -13 ≤ k ≤ 11, -26 ≤ l ≤ 26                                 |                  |
| Reflections collected             | 16478                                                                    |                  |
| Independent reflections           | 4539 [R(int) = 0.0331]                                                   |                  |
| Completeness to theta = 25.242°   | 100.0 %                                                                  |                  |
| Absorption correction             | Semi-empirical from equivalents                                          |                  |
| Max. and min. transmission        | 0.7457 and 0.6760                                                        |                  |
| Refinement method                 | Full-matrix least-squares on F <sup>2</sup>                              |                  |
| Data / restraints / parameters    | 4539 / 0 / 207                                                           |                  |
| Goodness-of-fit on F <sup>2</sup> | 1.156                                                                    |                  |
| Final R indices [I > 2σ(I)]       | R1 = 0.0282, wR2 = 0.0616                                                |                  |
| R indices (all data)              | R1 = 0.0344, wR2 = 0.0635                                                |                  |
| Extinction coefficient            | n/a                                                                      |                  |
| Largest diff. peak and hole       | 0.737 and -0.371 e.Å <sup>-3</sup>                                       |                  |

Table 2. Atomic coordinates ( $\times 10^4$ ) and equivalent isotropic displacement parameters ( $\text{\AA}^2 \times 10^3$ ) for cain83\_0m\_a.  $U(\text{eq})$  is defined as one third of the trace of the orthogonalized  $U^{ij}$  tensor.

|       | x        | y       | z       | $U(\text{eq})$ |
|-------|----------|---------|---------|----------------|
| I(1)  | 7724(1)  | 3940(1) | 5006(1) | 20(1)          |
| Cl(1) | 7701(7)  | 4151(5) | 4899(3) | 20(1)          |
| P(1)  | 6370(1)  | 5413(1) | 4005(1) | 17(1)          |
| N(1)  | 7468(2)  | 5664(2) | 3464(1) | 15(1)          |
| C(1)  | 6860(2)  | 7061(2) | 4385(1) | 17(1)          |
| C(2)  | 6252(3)  | 7727(2) | 4875(1) | 23(1)          |
| C(3)  | 6743(3)  | 9030(2) | 5074(1) | 27(1)          |
| C(4)  | 7820(3)  | 9647(2) | 4802(1) | 27(1)          |
| C(5)  | 8436(3)  | 8970(2) | 4323(1) | 22(1)          |
| C(6)  | 7936(2)  | 7681(2) | 4112(1) | 17(1)          |
| C(7)  | 8439(2)  | 6849(2) | 3578(1) | 17(1)          |
| C(8)  | 7474(2)  | 4820(2) | 2879(1) | 15(1)          |
| C(9)  | 8603(2)  | 3881(2) | 2885(1) | 17(1)          |
| C(10) | 8576(3)  | 3100(2) | 2304(1) | 23(1)          |
| C(11) | 7466(3)  | 3214(2) | 1742(1) | 26(1)          |
| C(12) | 6357(3)  | 4135(2) | 1747(1) | 21(1)          |
| C(13) | 6347(2)  | 4973(2) | 2307(1) | 16(1)          |
| C(14) | 9810(2)  | 3664(2) | 3500(1) | 20(1)          |
| C(15) | 11283(3) | 4012(3) | 3341(1) | 31(1)          |
| C(16) | 9805(3)  | 2201(2) | 3758(1) | 31(1)          |
| C(17) | 5111(2)  | 5968(2) | 2280(1) | 18(1)          |
| C(18) | 3738(3)  | 5195(3) | 2354(1) | 25(1)          |
| C(19) | 4823(3)  | 6822(2) | 1629(1) | 24(1)          |

Table 3. Bond lengths [ $\text{\AA}$ ] and angles [ $^\circ$ ] for cain83\_0m\_a.

---

|              |            |
|--------------|------------|
| I(1)-P(1)    | 2.5937(7)  |
| Cl(1)-P(1)   | 2.329(5)   |
| P(1)-N(1)    | 1.6657(17) |
| P(1)-C(1)    | 1.811(2)   |
| N(1)-C(7)    | 1.470(3)   |
| N(1)-C(8)    | 1.441(2)   |
| C(1)-C(2)    | 1.398(3)   |
| C(1)-C(6)    | 1.388(3)   |
| C(2)-H(2)    | 0.9500     |
| C(2)-C(3)    | 1.393(3)   |
| C(3)-H(3)    | 0.9500     |
| C(3)-C(4)    | 1.387(4)   |
| C(4)-H(4)    | 0.9500     |
| C(4)-C(5)    | 1.391(3)   |
| C(5)-H(5)    | 0.9500     |
| C(5)-C(6)    | 1.388(3)   |
| C(6)-C(7)    | 1.501(3)   |
| C(7)-H(7A)   | 0.9900     |
| C(7)-H(7B)   | 0.9900     |
| C(8)-C(9)    | 1.407(3)   |
| C(8)-C(13)   | 1.405(3)   |
| C(9)-C(10)   | 1.393(3)   |
| C(9)-C(14)   | 1.515(3)   |
| C(10)-H(10)  | 0.9500     |
| C(10)-C(11)  | 1.379(3)   |
| C(11)-H(11)  | 0.9500     |
| C(11)-C(12)  | 1.384(3)   |
| C(12)-H(12)  | 0.9500     |
| C(12)-C(13)  | 1.396(3)   |
| C(13)-C(17)  | 1.514(3)   |
| C(14)-H(14)  | 1.0000     |
| C(14)-C(15)  | 1.525(3)   |
| C(14)-C(16)  | 1.530(3)   |
| C(15)-H(15A) | 0.9800     |

|                 |            |
|-----------------|------------|
| C(15)-H(15B)    | 0.9800     |
| C(15)-H(15C)    | 0.9800     |
| C(16)-H(16A)    | 0.9800     |
| C(16)-H(16B)    | 0.9800     |
| C(16)-H(16C)    | 0.9800     |
| C(17)-H(17)     | 1.0000     |
| C(17)-C(18)     | 1.533(3)   |
| C(17)-C(19)     | 1.533(3)   |
| C(18)-H(18A)    | 0.9800     |
| C(18)-H(18B)    | 0.9800     |
| C(18)-H(18C)    | 0.9800     |
| C(19)-H(19A)    | 0.9800     |
| C(19)-H(19B)    | 0.9800     |
| C(19)-H(19C)    | 0.9800     |
|                 |            |
| N(1)-P(1)-I(1)  | 108.43(7)  |
| N(1)-P(1)-Cl(1) | 105.93(17) |
| N(1)-P(1)-C(1)  | 90.23(9)   |
| C(1)-P(1)-I(1)  | 97.42(7)   |
| C(1)-P(1)-Cl(1) | 95.74(16)  |
| C(7)-N(1)-P(1)  | 117.72(13) |
| C(8)-N(1)-P(1)  | 123.64(14) |
| C(8)-N(1)-C(7)  | 118.59(16) |
| C(2)-C(1)-P(1)  | 127.62(18) |
| C(6)-C(1)-P(1)  | 111.72(15) |
| C(6)-C(1)-C(2)  | 120.6(2)   |
| C(1)-C(2)-H(2)  | 120.9      |
| C(3)-C(2)-C(1)  | 118.2(2)   |
| C(3)-C(2)-H(2)  | 120.9      |
| C(2)-C(3)-H(3)  | 119.5      |
| C(4)-C(3)-C(2)  | 121.1(2)   |
| C(4)-C(3)-H(3)  | 119.5      |
| C(3)-C(4)-H(4)  | 119.8      |
| C(3)-C(4)-C(5)  | 120.4(2)   |
| C(5)-C(4)-H(4)  | 119.8      |
| C(4)-C(5)-H(5)  | 120.5      |

|                    |            |
|--------------------|------------|
| C(6)-C(5)-C(4)     | 119.0(2)   |
| C(6)-C(5)-H(5)     | 120.5      |
| C(1)-C(6)-C(7)     | 113.95(18) |
| C(5)-C(6)-C(1)     | 120.7(2)   |
| C(5)-C(6)-C(7)     | 125.3(2)   |
| N(1)-C(7)-C(6)     | 105.45(16) |
| N(1)-C(7)-H(7A)    | 110.7      |
| N(1)-C(7)-H(7B)    | 110.7      |
| C(6)-C(7)-H(7A)    | 110.7      |
| C(6)-C(7)-H(7B)    | 110.7      |
| H(7A)-C(7)-H(7B)   | 108.8      |
| C(9)-C(8)-N(1)     | 119.95(19) |
| C(13)-C(8)-N(1)    | 118.64(18) |
| C(13)-C(8)-C(9)    | 121.39(18) |
| C(8)-C(9)-C(14)    | 122.69(18) |
| C(10)-C(9)-C(8)    | 118.0(2)   |
| C(10)-C(9)-C(14)   | 119.28(19) |
| C(9)-C(10)-H(10)   | 119.2      |
| C(11)-C(10)-C(9)   | 121.5(2)   |
| C(11)-C(10)-H(10)  | 119.2      |
| C(10)-C(11)-H(11)  | 120.1      |
| C(10)-C(11)-C(12)  | 119.7(2)   |
| C(12)-C(11)-H(11)  | 120.1      |
| C(11)-C(12)-H(12)  | 119.3      |
| C(11)-C(12)-C(13)  | 121.3(2)   |
| C(13)-C(12)-H(12)  | 119.3      |
| C(8)-C(13)-C(17)   | 123.07(18) |
| C(12)-C(13)-C(8)   | 117.99(19) |
| C(12)-C(13)-C(17)  | 118.9(2)   |
| C(9)-C(14)-H(14)   | 108.1      |
| C(9)-C(14)-C(15)   | 111.21(19) |
| C(9)-C(14)-C(16)   | 110.8(2)   |
| C(15)-C(14)-H(14)  | 108.1      |
| C(15)-C(14)-C(16)  | 110.3(2)   |
| C(16)-C(14)-H(14)  | 108.1      |
| C(14)-C(15)-H(15A) | 109.5      |

|                     |            |
|---------------------|------------|
| C(14)-C(15)-H(15B)  | 109.5      |
| C(14)-C(15)-H(15C)  | 109.5      |
| H(15A)-C(15)-H(15B) | 109.5      |
| H(15A)-C(15)-H(15C) | 109.5      |
| H(15B)-C(15)-H(15C) | 109.5      |
| C(14)-C(16)-H(16A)  | 109.5      |
| C(14)-C(16)-H(16B)  | 109.5      |
| C(14)-C(16)-H(16C)  | 109.5      |
| H(16A)-C(16)-H(16B) | 109.5      |
| H(16A)-C(16)-H(16C) | 109.5      |
| H(16B)-C(16)-H(16C) | 109.5      |
| C(13)-C(17)-H(17)   | 108.0      |
| C(13)-C(17)-C(18)   | 109.54(18) |
| C(13)-C(17)-C(19)   | 112.68(17) |
| C(18)-C(17)-H(17)   | 108.0      |
| C(19)-C(17)-H(17)   | 108.0      |
| C(19)-C(17)-C(18)   | 110.41(19) |
| C(17)-C(18)-H(18A)  | 109.5      |
| C(17)-C(18)-H(18B)  | 109.5      |
| C(17)-C(18)-H(18C)  | 109.5      |
| H(18A)-C(18)-H(18B) | 109.5      |
| H(18A)-C(18)-H(18C) | 109.5      |
| H(18B)-C(18)-H(18C) | 109.5      |
| C(17)-C(19)-H(19A)  | 109.5      |
| C(17)-C(19)-H(19B)  | 109.5      |
| C(17)-C(19)-H(19C)  | 109.5      |
| H(19A)-C(19)-H(19B) | 109.5      |
| H(19A)-C(19)-H(19C) | 109.5      |
| H(19B)-C(19)-H(19C) | 109.5      |

---

Symmetry transformations used to generate equivalent atoms:

Table 4. Anisotropic displacement parameters ( $\text{\AA}^2 \times 10^3$ ) for cain83\_0m\_a. The anisotropic displacement factor exponent takes the form:  $-2\pi^2 [ h^2 a^{*2} U^{11} + \dots + 2 h k a^* b^* U^{12} ]$

|       | U <sup>11</sup> | U <sup>22</sup> | U <sup>33</sup> | U <sup>23</sup> | U <sup>13</sup> | U <sup>12</sup> |
|-------|-----------------|-----------------|-----------------|-----------------|-----------------|-----------------|
| I(1)  | 30(1)           | 17(1)           | 12(1)           | 4(1)            | 3(1)            | -5(1)           |
| Cl(1) | 30(1)           | 17(1)           | 12(1)           | 4(1)            | 3(1)            | -5(1)           |
| P(1)  | 17(1)           | 20(1)           | 16(1)           | -3(1)           | 6(1)            | -4(1)           |
| N(1)  | 16(1)           | 15(1)           | 13(1)           | -1(1)           | 4(1)            | -2(1)           |
| C(1)  | 18(1)           | 17(1)           | 14(1)           | -2(1)           | -1(1)           | 1(1)            |
| C(2)  | 22(1)           | 29(1)           | 17(1)           | -2(1)           | 2(1)            | 5(1)            |
| C(3)  | 31(1)           | 26(1)           | 21(1)           | -7(1)           | -2(1)           | 11(1)           |
| C(4)  | 38(2)           | 16(1)           | 21(1)           | -2(1)           | -6(1)           | 4(1)            |
| C(5)  | 29(1)           | 16(1)           | 19(1)           | 3(1)            | -2(1)           | -1(1)           |
| C(6)  | 20(1)           | 15(1)           | 14(1)           | 2(1)            | -2(1)           | 2(1)            |
| C(7)  | 18(1)           | 16(1)           | 17(1)           | 1(1)            | 4(1)            | -2(1)           |
| C(8)  | 18(1)           | 14(1)           | 14(1)           | 0(1)            | 5(1)            | -2(1)           |
| C(9)  | 19(1)           | 16(1)           | 18(1)           | 2(1)            | 6(1)            | -1(1)           |
| C(10) | 27(1)           | 21(1)           | 24(1)           | -1(1)           | 11(1)           | 7(1)            |
| C(11) | 38(2)           | 23(1)           | 19(1)           | -5(1)           | 10(1)           | 5(1)            |
| C(12) | 27(1)           | 21(1)           | 15(1)           | 0(1)            | 3(1)            | 0(1)            |
| C(13) | 18(1)           | 15(1)           | 16(1)           | 1(1)            | 5(1)            | 0(1)            |
| C(14) | 18(1)           | 19(1)           | 24(1)           | 2(1)            | 5(1)            | 2(1)            |
| C(15) | 21(1)           | 36(1)           | 37(1)           | -3(1)           | 9(1)            | 0(1)            |
| C(16) | 29(1)           | 24(1)           | 36(1)           | 9(1)            | -1(1)           | 3(1)            |
| C(17) | 19(1)           | 17(1)           | 17(1)           | -1(1)           | 0(1)            | 2(1)            |
| C(18) | 21(1)           | 28(1)           | 26(1)           | 3(1)            | 4(1)            | 1(1)            |
| C(19) | 27(1)           | 22(1)           | 22(1)           | 5(1)            | 1(1)            | 3(1)            |



Table 5. Hydrogen coordinates ( $\times 10^4$ ) and isotropic displacement parameters ( $\text{\AA}^2 \times 10^{-3}$ ) for cain83\_0m\_a.

|        | x     | y     | z    | U(eq) |
|--------|-------|-------|------|-------|
| H(2)   | 5523  | 7302  | 5067 | 28    |
| H(3)   | 6333  | 9504  | 5401 | 32    |
| H(4)   | 8139  | 10536 | 4944 | 32    |
| H(5)   | 9187  | 9384  | 4142 | 27    |
| H(7A)  | 8367  | 7380  | 3154 | 20    |
| H(7B)  | 9457  | 6558  | 3737 | 20    |
| H(10)  | 9340  | 2474  | 2295 | 28    |
| H(11)  | 7462  | 2663  | 1354 | 31    |
| H(12)  | 5587  | 4199  | 1361 | 26    |
| H(14)  | 9637  | 4286  | 3869 | 24    |
| H(15A) | 11490 | 3393  | 2991 | 46    |
| H(15B) | 12035 | 3915  | 3754 | 46    |
| H(15C) | 11272 | 4951  | 3177 | 46    |
| H(16A) | 10099 | 1582  | 3428 | 46    |
| H(16B) | 8827  | 1962  | 3816 | 46    |
| H(16C) | 10485 | 2121  | 4195 | 46    |
| H(17)  | 5374  | 6601  | 2675 | 22    |
| H(18A) | 3485  | 4536  | 1983 | 38    |
| H(18B) | 2938  | 5840  | 2336 | 38    |
| H(18C) | 3914  | 4715  | 2790 | 38    |
| H(19A) | 5726  | 7260  | 1572 | 37    |
| H(19B) | 4097  | 7520  | 1660 | 37    |
| H(19C) | 4464  | 6232  | 1238 | 37    |

Table 1. Crystal data and structure refinement for cain89\_0m\_a (Compound **5-*p*-MeC<sub>6</sub>H<sub>4</sub>**).

|                                   |                                             |                    |
|-----------------------------------|---------------------------------------------|--------------------|
| Identification code               | MC 4-49 F2                                  |                    |
| Empirical formula                 | C <sub>26</sub> H <sub>30</sub> N P         |                    |
| Formula weight                    | 387.48                                      |                    |
| Temperature                       | 100.0 K                                     |                    |
| Wavelength                        | 1.54178 Å                                   |                    |
| Crystal system                    | Monoclinic                                  |                    |
| Space group                       | P 21/c                                      |                    |
| Unit cell dimensions              | a = 10.1766(2) Å                            | α = 90°.           |
|                                   | b = 20.7413(4) Å                            | β = 109.8390(10)°. |
|                                   | c = 11.3263(2) Å                            | γ = 90°.           |
| Volume                            | 2248.82(7) Å <sup>3</sup>                   |                    |
| Z                                 | 4                                           |                    |
| Density (calculated)              | 1.144 Mg/m <sup>3</sup>                     |                    |
| Absorption coefficient            | 1.140 mm <sup>-1</sup>                      |                    |
| F(000)                            | 832                                         |                    |
| Crystal size                      | 0.32 x 0.21 x 0.14 mm <sup>3</sup>          |                    |
| Theta range for data collection   | 4.263 to 68.474°.                           |                    |
| Index ranges                      | -12 ≤ h ≤ 11, -25 ≤ k ≤ 24, -13 ≤ l ≤ 11    |                    |
| Reflections collected             | 12696                                       |                    |
| Independent reflections           | 4100 [R(int) = 0.0221]                      |                    |
| Completeness to theta = 67.679°   | 99.5 %                                      |                    |
| Absorption correction             | Semi-empirical from equivalents             |                    |
| Max. and min. transmission        | 0.7531 and 0.6524                           |                    |
| Refinement method                 | Full-matrix least-squares on F <sup>2</sup> |                    |
| Data / restraints / parameters    | 4100 / 0 / 258                              |                    |
| Goodness-of-fit on F <sup>2</sup> | 1.059                                       |                    |
| Final R indices [I > 2σ(I)]       | R1 = 0.0350, wR2 = 0.0929                   |                    |
| R indices (all data)              | R1 = 0.0377, wR2 = 0.0954                   |                    |
| Extinction coefficient            | n/a                                         |                    |
| Largest diff. peak and hole       | 0.354 and -0.264 e.Å <sup>-3</sup>          |                    |

Table 3. Atomic coordinates ( $\times 10^4$ ) and equivalent isotropic displacement parameters ( $\text{\AA}^2 \times 10^3$ ) for cain89\_0m\_a.  $U(\text{eq})$  is defined as one third of the trace of the orthogonalized  $U^{ij}$  tensor.

|       | x       | y       | z       | $U(\text{eq})$ |
|-------|---------|---------|---------|----------------|
| P(1)  | 5233(1) | 6732(1) | 5305(1) | 16(1)          |
| N(1)  | 4284(1) | 6903(1) | 6251(1) | 16(1)          |
| C(8)  | 6540(1) | 6129(1) | 6160(1) | 17(1)          |
| C(5)  | 6473(1) | 8369(1) | 7253(1) | 21(1)          |
| C(6)  | 5833(1) | 7793(1) | 6742(1) | 18(1)          |
| C(2)  | 7250(1) | 7735(1) | 5408(1) | 21(1)          |
| C(16) | 1761(1) | 6832(1) | 5115(1) | 20(1)          |
| C(15) | 2957(1) | 6608(1) | 6077(1) | 17(1)          |
| C(21) | 1814(1) | 7399(1) | 4286(1) | 22(1)          |
| C(1)  | 6224(1) | 7474(1) | 5828(1) | 17(1)          |
| C(9)  | 7453(1) | 6203(1) | 7390(1) | 22(1)          |
| C(7)  | 4687(1) | 7465(1) | 7074(1) | 19(1)          |
| C(20) | 2868(1) | 6111(1) | 6887(1) | 21(1)          |
| C(11) | 8341(1) | 5121(1) | 7387(1) | 25(1)          |
| C(13) | 6559(1) | 5547(1) | 5554(1) | 22(1)          |
| C(24) | 4137(1) | 5894(1) | 7980(1) | 23(1)          |
| C(4)  | 7488(1) | 8630(1) | 6826(1) | 24(1)          |
| C(12) | 7450(1) | 5048(1) | 6154(1) | 26(1)          |
| C(3)  | 7870(1) | 8316(1) | 5907(1) | 24(1)          |
| C(17) | 491(1)  | 6525(1) | 4946(1) | 26(1)          |
| C(10) | 8331(1) | 5706(1) | 7990(1) | 25(1)          |
| C(19) | 1571(2) | 5823(1) | 6684(1) | 30(1)          |
| C(26) | 3885(2) | 5949(1) | 9231(1) | 36(1)          |
| C(22) | 1476(2) | 7194(1) | 2920(1) | 31(1)          |
| C(23) | 838(2)  | 7942(1) | 4376(2) | 38(1)          |
| C(25) | 4588(2) | 5212(1) | 7789(1) | 31(1)          |
| C(18) | 395(2)  | 6023(1) | 5716(1) | 33(1)          |
| C(14) | 9290(2) | 4581(1) | 8064(2) | 37(1)          |

Table 4. Bond lengths [ $\text{\AA}$ ] and angles [ $^\circ$ ] for cain89\_0m\_a.

---

|             |            |
|-------------|------------|
| P(1)-N(1)   | 1.7058(11) |
| P(1)-C(8)   | 1.8433(13) |
| P(1)-C(1)   | 1.8263(13) |
| N(1)-C(15)  | 1.4335(16) |
| N(1)-C(7)   | 1.4608(16) |
| C(8)-C(9)   | 1.3963(18) |
| C(8)-C(13)  | 1.3920(18) |
| C(5)-H(5)   | 0.9500     |
| C(5)-C(6)   | 1.3907(18) |
| C(5)-C(4)   | 1.390(2)   |
| C(6)-C(1)   | 1.3945(18) |
| C(6)-C(7)   | 1.5043(17) |
| C(2)-H(2)   | 0.9500     |
| C(2)-C(1)   | 1.3946(18) |
| C(2)-C(3)   | 1.3875(19) |
| C(16)-C(15) | 1.4084(18) |
| C(16)-C(21) | 1.5180(18) |
| C(16)-C(17) | 1.3940(19) |
| C(15)-C(20) | 1.4038(18) |
| C(21)-H(21) | 1.0000     |
| C(21)-C(22) | 1.5266(19) |
| C(21)-C(23) | 1.527(2)   |
| C(9)-H(9)   | 0.9500     |
| C(9)-C(10)  | 1.3830(19) |
| C(7)-H(7A)  | 0.9900     |
| C(7)-H(7B)  | 0.9900     |
| C(20)-C(24) | 1.5220(18) |
| C(20)-C(19) | 1.3962(19) |
| C(11)-C(12) | 1.392(2)   |
| C(11)-C(10) | 1.393(2)   |
| C(11)-C(14) | 1.5076(19) |
| C(13)-H(13) | 0.9500     |
| C(13)-C(12) | 1.391(2)   |
| C(24)-H(24) | 1.0000     |

|                 |            |
|-----------------|------------|
| C(24)-C(26)     | 1.528(2)   |
| C(24)-C(25)     | 1.525(2)   |
| C(4)-H(4)       | 0.9500     |
| C(4)-C(3)       | 1.389(2)   |
| C(12)-H(12)     | 0.9500     |
| C(3)-H(3)       | 0.9500     |
| C(17)-H(17)     | 0.9500     |
| C(17)-C(18)     | 1.383(2)   |
| C(10)-H(10)     | 0.9500     |
| C(19)-H(19)     | 0.9500     |
| C(19)-C(18)     | 1.384(2)   |
| C(26)-H(26A)    | 0.9800     |
| C(26)-H(26B)    | 0.9800     |
| C(26)-H(26C)    | 0.9800     |
| C(22)-H(22A)    | 0.9800     |
| C(22)-H(22B)    | 0.9800     |
| C(22)-H(22C)    | 0.9800     |
| C(23)-H(23A)    | 0.9800     |
| C(23)-H(23B)    | 0.9800     |
| C(23)-H(23C)    | 0.9800     |
| C(25)-H(25A)    | 0.9800     |
| C(25)-H(25B)    | 0.9800     |
| C(25)-H(25C)    | 0.9800     |
| C(18)-H(18)     | 0.9500     |
| C(14)-H(14A)    | 0.9800     |
| C(14)-H(14B)    | 0.9800     |
| C(14)-H(14C)    | 0.9800     |
|                 |            |
| N(1)-P(1)-C(8)  | 105.85(5)  |
| N(1)-P(1)-C(1)  | 89.35(5)   |
| C(1)-P(1)-C(8)  | 100.44(5)  |
| C(15)-N(1)-P(1) | 122.16(8)  |
| C(15)-N(1)-C(7) | 118.37(10) |
| C(7)-N(1)-P(1)  | 118.10(8)  |
| C(9)-C(8)-P(1)  | 124.49(10) |
| C(13)-C(8)-P(1) | 117.26(10) |

|                   |            |
|-------------------|------------|
| C(13)-C(8)-C(9)   | 118.15(12) |
| C(6)-C(5)-H(5)    | 120.4      |
| C(4)-C(5)-H(5)    | 120.4      |
| C(4)-C(5)-C(6)    | 119.18(13) |
| C(5)-C(6)-C(1)    | 120.29(12) |
| C(5)-C(6)-C(7)    | 125.30(12) |
| C(1)-C(6)-C(7)    | 114.40(11) |
| C(1)-C(2)-H(2)    | 120.4      |
| C(3)-C(2)-H(2)    | 120.4      |
| C(3)-C(2)-C(1)    | 119.17(12) |
| C(15)-C(16)-C(21) | 122.05(11) |
| C(17)-C(16)-C(15) | 118.29(12) |
| C(17)-C(16)-C(21) | 119.65(12) |
| C(16)-C(15)-N(1)  | 119.50(11) |
| C(20)-C(15)-N(1)  | 119.36(11) |
| C(20)-C(15)-C(16) | 121.13(12) |
| C(16)-C(21)-H(21) | 107.7      |
| C(16)-C(21)-C(22) | 111.56(11) |
| C(16)-C(21)-C(23) | 111.68(11) |
| C(22)-C(21)-H(21) | 107.7      |
| C(22)-C(21)-C(23) | 110.19(12) |
| C(23)-C(21)-H(21) | 107.7      |
| C(6)-C(1)-P(1)    | 111.97(9)  |
| C(6)-C(1)-C(2)    | 120.31(12) |
| C(2)-C(1)-P(1)    | 127.71(10) |
| C(8)-C(9)-H(9)    | 119.7      |
| C(10)-C(9)-C(8)   | 120.53(12) |
| C(10)-C(9)-H(9)   | 119.7      |
| N(1)-C(7)-C(6)    | 105.89(10) |
| N(1)-C(7)-H(7A)   | 110.6      |
| N(1)-C(7)-H(7B)   | 110.6      |
| C(6)-C(7)-H(7A)   | 110.6      |
| C(6)-C(7)-H(7B)   | 110.6      |
| H(7A)-C(7)-H(7B)  | 108.7      |
| C(15)-C(20)-C(24) | 121.62(12) |
| C(19)-C(20)-C(15) | 118.32(12) |

|                     |            |
|---------------------|------------|
| C(19)-C(20)-C(24)   | 120.04(12) |
| C(12)-C(11)-C(10)   | 118.38(12) |
| C(12)-C(11)-C(14)   | 121.11(13) |
| C(10)-C(11)-C(14)   | 120.50(13) |
| C(8)-C(13)-H(13)    | 119.4      |
| C(12)-C(13)-C(8)    | 121.29(12) |
| C(12)-C(13)-H(13)   | 119.4      |
| C(20)-C(24)-H(24)   | 107.4      |
| C(20)-C(24)-C(26)   | 111.66(12) |
| C(20)-C(24)-C(25)   | 111.87(12) |
| C(26)-C(24)-H(24)   | 107.4      |
| C(25)-C(24)-H(24)   | 107.4      |
| C(25)-C(24)-C(26)   | 110.74(12) |
| C(5)-C(4)-H(4)      | 119.7      |
| C(3)-C(4)-C(5)      | 120.56(12) |
| C(3)-C(4)-H(4)      | 119.7      |
| C(11)-C(12)-H(12)   | 119.8      |
| C(13)-C(12)-C(11)   | 120.31(12) |
| C(13)-C(12)-H(12)   | 119.8      |
| C(2)-C(3)-C(4)      | 120.48(12) |
| C(2)-C(3)-H(3)      | 119.8      |
| C(4)-C(3)-H(3)      | 119.8      |
| C(16)-C(17)-H(17)   | 119.4      |
| C(18)-C(17)-C(16)   | 121.18(13) |
| C(18)-C(17)-H(17)   | 119.4      |
| C(9)-C(10)-C(11)    | 121.31(13) |
| C(9)-C(10)-H(10)    | 119.3      |
| C(11)-C(10)-H(10)   | 119.3      |
| C(20)-C(19)-H(19)   | 119.4      |
| C(18)-C(19)-C(20)   | 121.13(13) |
| C(18)-C(19)-H(19)   | 119.4      |
| C(24)-C(26)-H(26A)  | 109.5      |
| C(24)-C(26)-H(26B)  | 109.5      |
| C(24)-C(26)-H(26C)  | 109.5      |
| H(26A)-C(26)-H(26B) | 109.5      |
| H(26A)-C(26)-H(26C) | 109.5      |

|                     |            |
|---------------------|------------|
| H(26B)-C(26)-H(26C) | 109.5      |
| C(21)-C(22)-H(22A)  | 109.5      |
| C(21)-C(22)-H(22B)  | 109.5      |
| C(21)-C(22)-H(22C)  | 109.5      |
| H(22A)-C(22)-H(22B) | 109.5      |
| H(22A)-C(22)-H(22C) | 109.5      |
| H(22B)-C(22)-H(22C) | 109.5      |
| C(21)-C(23)-H(23A)  | 109.5      |
| C(21)-C(23)-H(23B)  | 109.5      |
| C(21)-C(23)-H(23C)  | 109.5      |
| H(23A)-C(23)-H(23B) | 109.5      |
| H(23A)-C(23)-H(23C) | 109.5      |
| H(23B)-C(23)-H(23C) | 109.5      |
| C(24)-C(25)-H(25A)  | 109.5      |
| C(24)-C(25)-H(25B)  | 109.5      |
| C(24)-C(25)-H(25C)  | 109.5      |
| H(25A)-C(25)-H(25B) | 109.5      |
| H(25A)-C(25)-H(25C) | 109.5      |
| H(25B)-C(25)-H(25C) | 109.5      |
| C(17)-C(18)-C(19)   | 119.89(13) |
| C(17)-C(18)-H(18)   | 120.1      |
| C(19)-C(18)-H(18)   | 120.1      |
| C(11)-C(14)-H(14A)  | 109.5      |
| C(11)-C(14)-H(14B)  | 109.5      |
| C(11)-C(14)-H(14C)  | 109.5      |
| H(14A)-C(14)-H(14B) | 109.5      |
| H(14A)-C(14)-H(14C) | 109.5      |
| H(14B)-C(14)-H(14C) | 109.5      |

---

Symmetry transformations used to generate equivalent atoms:



Table 5. Anisotropic displacement parameters ( $\text{\AA}^2 \times 10^3$ ) for cain89\_0m\_a. The anisotropic displacement factor exponent takes the form:  $-2\pi^2 [ h^2 a^{*2} U^{11} + \dots + 2 h k a^* b^* U^{12} ]$

|       | U <sup>11</sup> | U <sup>22</sup> | U <sup>33</sup> | U <sup>23</sup> | U <sup>13</sup> | U <sup>12</sup> |
|-------|-----------------|-----------------|-----------------|-----------------|-----------------|-----------------|
| P(1)  | 14(1)           | 18(1)           | 14(1)           | -1(1)           | 3(1)            | -1(1)           |
| N(1)  | 14(1)           | 17(1)           | 18(1)           | -2(1)           | 4(1)            | -2(1)           |
| C(8)  | 15(1)           | 17(1)           | 21(1)           | -1(1)           | 7(1)            | -1(1)           |
| C(5)  | 19(1)           | 19(1)           | 23(1)           | -1(1)           | 4(1)            | -1(1)           |
| C(6)  | 15(1)           | 17(1)           | 18(1)           | 3(1)            | 2(1)            | 1(1)            |
| C(2)  | 17(1)           | 25(1)           | 20(1)           | 3(1)            | 6(1)            | 2(1)            |
| C(16) | 17(1)           | 26(1)           | 16(1)           | -2(1)           | 5(1)            | -1(1)           |
| C(15) | 15(1)           | 20(1)           | 16(1)           | -2(1)           | 5(1)            | -2(1)           |
| C(21) | 17(1)           | 26(1)           | 21(1)           | 4(1)            | 4(1)            | 1(1)            |
| C(1)  | 14(1)           | 17(1)           | 17(1)           | 3(1)            | 1(1)            | 1(1)            |
| C(9)  | 23(1)           | 18(1)           | 24(1)           | -4(1)           | 5(1)            | 1(1)            |
| C(7)  | 18(1)           | 20(1)           | 18(1)           | -3(1)           | 7(1)            | -3(1)           |
| C(20) | 23(1)           | 22(1)           | 18(1)           | -1(1)           | 6(1)            | -4(1)           |
| C(11) | 22(1)           | 18(1)           | 36(1)           | 4(1)            | 13(1)           | 2(1)            |
| C(13) | 20(1)           | 22(1)           | 24(1)           | -5(1)           | 8(1)            | -3(1)           |
| C(24) | 26(1)           | 20(1)           | 20(1)           | 3(1)            | 4(1)            | -2(1)           |
| C(4)  | 20(1)           | 18(1)           | 31(1)           | 1(1)            | 3(1)            | -4(1)           |
| C(12) | 28(1)           | 16(1)           | 36(1)           | -5(1)           | 15(1)           | -1(1)           |
| C(3)  | 16(1)           | 25(1)           | 29(1)           | 7(1)            | 7(1)            | -2(1)           |
| C(17) | 16(1)           | 41(1)           | 20(1)           | 1(1)            | 3(1)            | -4(1)           |
| C(10) | 23(1)           | 24(1)           | 24(1)           | 1(1)            | 2(1)            | 2(1)            |
| C(19) | 30(1)           | 33(1)           | 25(1)           | 5(1)            | 9(1)            | -12(1)          |
| C(26) | 41(1)           | 43(1)           | 20(1)           | 0(1)            | 5(1)            | 9(1)            |
| C(22) | 30(1)           | 40(1)           | 22(1)           | 4(1)            | 9(1)            | -7(1)           |
| C(23) | 41(1)           | 40(1)           | 38(1)           | 15(1)           | 19(1)           | 18(1)           |
| C(25) | 36(1)           | 24(1)           | 33(1)           | 1(1)            | 11(1)           | -1(1)           |
| C(18) | 23(1)           | 46(1)           | 28(1)           | 0(1)            | 8(1)            | -16(1)          |
| C(14) | 34(1)           | 25(1)           | 50(1)           | 7(1)            | 12(1)           | 10(1)           |

Table 6. Hydrogen coordinates ( $\times 10^4$ ) and isotropic displacement parameters ( $\text{\AA}^2 \times 10^{-3}$ ) for cain89\_0m\_a.

|        | x     | y    | z    | U(eq) |
|--------|-------|------|------|-------|
| H(5)   | 6219  | 8583 | 7886 | 26    |
| H(2)   | 7521  | 7518 | 4789 | 25    |
| H(21)  | 2789  | 7572 | 4589 | 26    |
| H(9)   | 7470  | 6598 | 7819 | 27    |
| H(7A)  | 5027  | 7330 | 7966 | 22    |
| H(7B)  | 3882  | 7759 | 6935 | 22    |
| H(13)  | 5952  | 5489 | 4714 | 26    |
| H(24)  | 4926  | 6190 | 8017 | 28    |
| H(4)   | 7924  | 9025 | 7164 | 29    |
| H(12)  | 7451  | 4657 | 5720 | 31    |
| H(3)   | 8560  | 8501 | 5619 | 29    |
| H(17)  | -323  | 6664 | 4290 | 32    |
| H(10)  | 8940  | 5764 | 8829 | 30    |
| H(19)  | 1493  | 5483 | 7219 | 35    |
| H(26A) | 3615  | 6392 | 9344 | 54    |
| H(26B) | 4743  | 5836 | 9918 | 54    |
| H(26C) | 3135  | 5653 | 9235 | 54    |
| H(22A) | 2122  | 6853 | 2871 | 46    |
| H(22B) | 1574  | 7565 | 2421 | 46    |
| H(22C) | 515   | 7032 | 2591 | 46    |
| H(23A) | -129  | 7788 | 4069 | 57    |
| H(23B) | 935   | 8308 | 3864 | 57    |
| H(23C) | 1083  | 8078 | 5253 | 57    |
| H(25A) | 3825  | 4910 | 7725 | 47    |
| H(25B) | 5412  | 5092 | 8504 | 47    |
| H(25C) | 4816  | 5195 | 7015 | 47    |
| H(18)  | -477  | 5816 | 5581 | 39    |
| H(14A) | 8850  | 4344 | 8580 | 56    |
| H(14B) | 10183 | 4760 | 8604 | 56    |
| H(14C) | 9453  | 4288 | 7450 | 56    |

---

Table 1. Crystal data and structure refinement for cain94\_0m\_a (Compound **6-Pd<sub>2</sub>-(P(*t*-Bu)<sub>3</sub>)<sub>2</sub>**).

|                                   |                                                                  |                    |
|-----------------------------------|------------------------------------------------------------------|--------------------|
| Identification code               | MC 5-17                                                          |                    |
| Empirical formula                 | C <sub>43</sub> H <sub>77</sub> I N <sub>3</sub> Pd <sub>2</sub> |                    |
| Formula weight                    | 1040.66                                                          |                    |
| Temperature                       | 100.0 K                                                          |                    |
| Wavelength                        | 0.71073 Å                                                        |                    |
| Crystal system                    | Monoclinic                                                       |                    |
| Space group                       | P 2 <sub>1</sub> /n                                              |                    |
| Unit cell dimensions              | a = 13.6610(2) Å                                                 | α = 90°.           |
|                                   | b = 23.3921(3) Å                                                 | β = 106.8940(10)°. |
|                                   | c = 15.1918(2) Å                                                 | γ = 90°.           |
| Volume                            | 4645.17(11) Å <sup>3</sup>                                       |                    |
| Z                                 | 4                                                                |                    |
| Density (calculated)              | 1.488 Mg/m <sup>3</sup>                                          |                    |
| Absorption coefficient            | 1.571 mm <sup>-1</sup>                                           |                    |
| F(000)                            | 2128                                                             |                    |
| Crystal size                      | 0.29 x 0.27 x 0.17 mm <sup>3</sup>                               |                    |
| Theta range for data collection   | 1.649 to 28.312°.                                                |                    |
| Index ranges                      | -16 ≤ h ≤ 18, -30 ≤ k ≤ 31, -18 ≤ l ≤ 20                         |                    |
| Reflections collected             | 38348                                                            |                    |
| Independent reflections           | 11515 [R(int) = 0.0594]                                          |                    |
| Completeness to theta = 25.242°   | 100.0 %                                                          |                    |
| Absorption correction             | Semi-empirical from equivalents                                  |                    |
| Max. and min. transmission        | 0.7457 and 0.6555                                                |                    |
| Refinement method                 | Full-matrix least-squares on F <sup>2</sup>                      |                    |
| Data / restraints / parameters    | 11515 / 0 / 472                                                  |                    |
| Goodness-of-fit on F <sup>2</sup> | 1.039                                                            |                    |
| Final R indices [I > 2σ(I)]       | R1 = 0.0313, wR2 = 0.0712                                        |                    |
| R indices (all data)              | R1 = 0.0399, wR2 = 0.0769                                        |                    |
| Extinction coefficient            | n/a                                                              |                    |
| Largest diff. peak and hole       | 0.831 and -0.510 e.Å <sup>-3</sup>                               |                    |

Table 2. Atomic coordinates ( $\times 10^4$ ) and equivalent isotropic displacement parameters ( $\text{\AA}^2 \times 10^3$ ) for cain94\_0m\_a.  $U(\text{eq})$  is defined as one third of the trace of the orthogonalized  $U^{ij}$  tensor.

|       | x        | y       | z        | $U(\text{eq})$ |
|-------|----------|---------|----------|----------------|
| I(1)  | 7200(1)  | 5050(1) | 8790(1)  | 14(1)          |
| Pd(1) | 6432(1)  | 6133(1) | 8264(1)  | 10(1)          |
| Pd(2) | 7834(1)  | 5717(1) | 7575(1)  | 9(1)           |
| P(1)  | 6912(1)  | 6495(1) | 7082(1)  | 10(1)          |
| P(3)  | 9395(1)  | 5494(1) | 7301(1)  | 11(1)          |
| P(2)  | 5769(1)  | 6680(1) | 9254(1)  | 13(1)          |
| N(1)  | 6149(2)  | 6670(1) | 6016(2)  | 12(1)          |
| C(8)  | 5559(2)  | 6282(1) | 5323(2)  | 13(1)          |
| C(13) | 5802(2)  | 6226(1) | 4481(2)  | 14(1)          |
| C(28) | 5375(2)  | 7445(1) | 8847(2)  | 17(1)          |
| C(7)  | 6021(2)  | 7290(1) | 5816(2)  | 16(1)          |
| C(9)  | 4718(2)  | 5988(1) | 5459(2)  | 14(1)          |
| C(1)  | 7426(2)  | 7211(1) | 7215(2)  | 12(1)          |
| C(40) | 9195(2)  | 4836(1) | 6530(2)  | 14(1)          |
| C(10) | 4165(2)  | 5618(1) | 4769(2)  | 18(1)          |
| C(32) | 9924(2)  | 6096(1) | 6714(2)  | 13(1)          |
| C(43) | 8580(2)  | 5016(1) | 5555(2)  | 19(1)          |
| C(17) | 6670(2)  | 6544(1) | 4242(2)  | 17(1)          |
| C(41) | 10162(2) | 4511(1) | 6482(2)  | 21(1)          |
| C(6)  | 6867(2)  | 7580(1) | 6532(2)  | 14(1)          |
| C(42) | 8495(2)  | 4417(1) | 6852(2)  | 19(1)          |
| C(12) | 5211(2)  | 5859(1) | 3808(2)  | 17(1)          |
| C(11) | 4401(2)  | 5548(1) | 3954(2)  | 18(1)          |
| C(2)  | 8240(2)  | 7419(1) | 7924(2)  | 15(1)          |
| C(35) | 9015(2)  | 6366(1) | 5980(2)  | 18(1)          |
| C(4)  | 7919(2)  | 8363(1) | 7269(2)  | 21(1)          |
| C(36) | 10418(2) | 5321(1) | 8419(2)  | 18(1)          |
| C(20) | 6865(2)  | 6726(1) | 10378(2) | 20(1)          |
| C(3)  | 8484(2)  | 7996(1) | 7951(2)  | 20(1)          |
| C(33) | 10740(2) | 5923(1) | 6247(2)  | 19(1)          |
| C(38) | 11526(2) | 5297(1) | 8365(2)  | 22(1)          |

|       |          |         |          |       |
|-------|----------|---------|----------|-------|
| C(21) | 7874(2)  | 6830(1) | 10137(2) | 25(1) |
| C(24) | 4622(2)  | 6340(1) | 9540(2)  | 22(1) |
| C(19) | 6260(2)  | 7036(1) | 3551(2)  | 22(1) |
| C(14) | 4305(2)  | 6092(1) | 6277(2)  | 15(1) |
| C(29) | 6331(2)  | 7795(1) | 8886(2)  | 21(1) |
| C(39) | 10184(2) | 4737(1) | 8790(2)  | 21(1) |
| C(37) | 10347(2) | 5769(1) | 9140(2)  | 23(1) |
| C(5)  | 7110(2)  | 8161(1) | 6554(2)  | 19(1) |
| C(31) | 4764(2)  | 7770(1) | 9386(2)  | 24(1) |
| C(15) | 4083(2)  | 5538(1) | 6720(2)  | 22(1) |
| C(34) | 10365(2) | 6578(1) | 7408(2)  | 21(1) |
| C(30) | 4757(2)  | 7427(1) | 7825(2)  | 23(1) |
| C(18) | 7303(2)  | 6148(1) | 3818(2)  | 21(1) |
| C(25) | 4770(3)  | 5684(1) | 9559(3)  | 27(1) |
| C(16) | 3338(2)  | 6462(1) | 5959(2)  | 22(1) |
| C(23) | 6768(2)  | 7188(1) | 11078(2) | 26(1) |
| C(26) | 4423(3)  | 6524(1) | 10447(3) | 31(1) |
| C(27) | 3652(2)  | 6457(1) | 8753(3)  | 31(1) |
| C(22) | 7011(3)  | 6143(1) | 10875(2) | 29(1) |

---

Table 3. Bond lengths [Å] and angles [°] for cain94\_0m\_a.

---

|             |           |
|-------------|-----------|
| I(1)-Pd(1)  | 2.7678(2) |
| I(1)-Pd(2)  | 2.7441(2) |
| Pd(1)-Pd(2) | 2.6215(3) |
| Pd(1)-P(1)  | 2.2491(7) |
| Pd(1)-P(2)  | 2.3494(7) |
| Pd(2)-P(1)  | 2.2157(6) |
| Pd(2)-P(3)  | 2.3467(7) |
| P(1)-N(1)   | 1.701(2)  |
| P(1)-C(1)   | 1.804(2)  |
| P(3)-C(40)  | 1.906(3)  |
| P(3)-C(32)  | 1.915(3)  |
| P(3)-C(36)  | 1.903(3)  |
| P(2)-C(28)  | 1.919(3)  |
| P(2)-C(20)  | 1.919(3)  |
| P(2)-C(24)  | 1.916(3)  |
| N(1)-C(8)   | 1.445(3)  |
| N(1)-C(7)   | 1.483(3)  |
| C(8)-C(13)  | 1.417(4)  |
| C(8)-C(9)   | 1.405(4)  |
| C(13)-C(17) | 1.530(4)  |
| C(13)-C(12) | 1.398(4)  |
| C(28)-C(29) | 1.528(4)  |
| C(28)-C(31) | 1.531(4)  |
| C(28)-C(30) | 1.536(4)  |
| C(7)-H(7A)  | 0.9900    |
| C(7)-H(7B)  | 0.9900    |
| C(7)-C(6)   | 1.499(4)  |
| C(9)-C(10)  | 1.399(4)  |
| C(9)-C(14)  | 1.526(4)  |
| C(1)-C(6)   | 1.394(4)  |
| C(1)-C(2)   | 1.392(4)  |
| C(40)-C(43) | 1.534(4)  |
| C(40)-C(41) | 1.544(4)  |
| C(40)-C(42) | 1.545(4)  |

|              |          |
|--------------|----------|
| C(10)-H(10)  | 0.9500   |
| C(10)-C(11)  | 1.377(4) |
| C(32)-C(35)  | 1.543(4) |
| C(32)-C(33)  | 1.539(4) |
| C(32)-C(34)  | 1.541(4) |
| C(43)-H(43A) | 0.9800   |
| C(43)-H(43B) | 0.9800   |
| C(43)-H(43C) | 0.9800   |
| C(17)-H(17)  | 1.0000   |
| C(17)-C(19)  | 1.547(4) |
| C(17)-C(18)  | 1.531(4) |
| C(41)-H(41A) | 0.9800   |
| C(41)-H(41B) | 0.9800   |
| C(41)-H(41C) | 0.9800   |
| C(6)-C(5)    | 1.397(3) |
| C(42)-H(42A) | 0.9800   |
| C(42)-H(42B) | 0.9800   |
| C(42)-H(42C) | 0.9800   |
| C(12)-H(12)  | 0.9500   |
| C(12)-C(11)  | 1.395(4) |
| C(11)-H(11)  | 0.9500   |
| C(2)-H(2)    | 0.9500   |
| C(2)-C(3)    | 1.387(3) |
| C(35)-H(35A) | 0.9800   |
| C(35)-H(35B) | 0.9800   |
| C(35)-H(35C) | 0.9800   |
| C(4)-H(4)    | 0.9500   |
| C(4)-C(3)    | 1.393(4) |
| C(4)-C(5)    | 1.388(4) |
| C(36)-C(38)  | 1.540(4) |
| C(36)-C(39)  | 1.546(4) |
| C(36)-C(37)  | 1.539(4) |
| C(20)-C(21)  | 1.545(4) |
| C(20)-C(23)  | 1.547(4) |
| C(20)-C(22)  | 1.543(4) |
| C(3)-H(3)    | 0.9500   |

|              |          |
|--------------|----------|
| C(33)-H(33A) | 0.9800   |
| C(33)-H(33B) | 0.9800   |
| C(33)-H(33C) | 0.9800   |
| C(38)-H(38A) | 0.9800   |
| C(38)-H(38B) | 0.9800   |
| C(38)-H(38C) | 0.9800   |
| C(21)-H(21A) | 0.9800   |
| C(21)-H(21B) | 0.9800   |
| C(21)-H(21C) | 0.9800   |
| C(24)-C(25)  | 1.549(4) |
| C(24)-C(26)  | 1.541(4) |
| C(24)-C(27)  | 1.530(5) |
| C(19)-H(19A) | 0.9800   |
| C(19)-H(19B) | 0.9800   |
| C(19)-H(19C) | 0.9800   |
| C(14)-H(14)  | 1.0000   |
| C(14)-C(15)  | 1.529(4) |
| C(14)-C(16)  | 1.536(4) |
| C(29)-H(29A) | 0.9800   |
| C(29)-H(29B) | 0.9800   |
| C(29)-H(29C) | 0.9800   |
| C(39)-H(39A) | 0.9800   |
| C(39)-H(39B) | 0.9800   |
| C(39)-H(39C) | 0.9800   |
| C(37)-H(37A) | 0.9800   |
| C(37)-H(37B) | 0.9800   |
| C(37)-H(37C) | 0.9800   |
| C(5)-H(5)    | 0.9500   |
| C(31)-H(31A) | 0.9800   |
| C(31)-H(31B) | 0.9800   |
| C(31)-H(31C) | 0.9800   |
| C(15)-H(15A) | 0.9800   |
| C(15)-H(15B) | 0.9800   |
| C(15)-H(15C) | 0.9800   |
| C(34)-H(34A) | 0.9800   |
| C(34)-H(34B) | 0.9800   |



|                  |             |
|------------------|-------------|
| C(34)-H(34C)     | 0.9800      |
| C(30)-H(30A)     | 0.9800      |
| C(30)-H(30B)     | 0.9800      |
| C(30)-H(30C)     | 0.9800      |
| C(18)-H(18A)     | 0.9800      |
| C(18)-H(18B)     | 0.9800      |
| C(18)-H(18C)     | 0.9800      |
| C(25)-H(25A)     | 0.9800      |
| C(25)-H(25B)     | 0.9800      |
| C(25)-H(25C)     | 0.9800      |
| C(16)-H(16A)     | 0.9800      |
| C(16)-H(16B)     | 0.9800      |
| C(16)-H(16C)     | 0.9800      |
| C(23)-H(23A)     | 0.9800      |
| C(23)-H(23B)     | 0.9800      |
| C(23)-H(23C)     | 0.9800      |
| C(26)-H(26A)     | 0.9800      |
| C(26)-H(26B)     | 0.9800      |
| C(26)-H(26C)     | 0.9800      |
| C(27)-H(27A)     | 0.9800      |
| C(27)-H(27B)     | 0.9800      |
| C(27)-H(27C)     | 0.9800      |
| C(22)-H(22A)     | 0.9800      |
| C(22)-H(22B)     | 0.9800      |
| C(22)-H(22C)     | 0.9800      |
|                  |             |
| Pd(2)-I(1)-Pd(1) | 56.795(6)   |
| Pd(2)-Pd(1)-I(1) | 61.146(6)   |
| P(1)-Pd(1)-I(1)  | 113.708(17) |
| P(1)-Pd(1)-Pd(2) | 53.457(17)  |
| P(1)-Pd(1)-P(2)  | 124.20(2)   |
| P(2)-Pd(1)-I(1)  | 119.846(19) |
| P(2)-Pd(1)-Pd(2) | 156.989(19) |
| Pd(1)-Pd(2)-I(1) | 62.059(7)   |
| P(1)-Pd(2)-I(1)  | 115.765(19) |
| P(1)-Pd(2)-Pd(1) | 54.638(18)  |

|                   |             |
|-------------------|-------------|
| P(1)-Pd(2)-P(3)   | 125.40(2)   |
| P(3)-Pd(2)-I(1)   | 118.288(17) |
| P(3)-Pd(2)-Pd(1)  | 163.728(19) |
| Pd(2)-P(1)-Pd(1)  | 71.90(2)    |
| N(1)-P(1)-Pd(1)   | 127.58(8)   |
| N(1)-P(1)-Pd(2)   | 130.52(8)   |
| N(1)-P(1)-C(1)    | 89.72(11)   |
| C(1)-P(1)-Pd(1)   | 117.04(9)   |
| C(1)-P(1)-Pd(2)   | 124.05(9)   |
| C(40)-P(3)-Pd(2)  | 108.24(8)   |
| C(40)-P(3)-C(32)  | 108.26(12)  |
| C(32)-P(3)-Pd(2)  | 113.81(8)   |
| C(36)-P(3)-Pd(2)  | 111.02(9)   |
| C(36)-P(3)-C(40)  | 108.29(12)  |
| C(36)-P(3)-C(32)  | 107.06(12)  |
| C(28)-P(2)-Pd(1)  | 115.20(9)   |
| C(28)-P(2)-C(20)  | 107.93(13)  |
| C(20)-P(2)-Pd(1)  | 104.70(9)   |
| C(24)-P(2)-Pd(1)  | 114.37(9)   |
| C(24)-P(2)-C(28)  | 106.78(12)  |
| C(24)-P(2)-C(20)  | 107.45(14)  |
| C(8)-N(1)-P(1)    | 126.95(16)  |
| C(8)-N(1)-C(7)    | 117.2(2)    |
| C(7)-N(1)-P(1)    | 115.65(17)  |
| C(13)-C(8)-N(1)   | 119.2(2)    |
| C(9)-C(8)-N(1)    | 120.5(2)    |
| C(9)-C(8)-C(13)   | 120.2(2)    |
| C(8)-C(13)-C(17)  | 124.8(2)    |
| C(12)-C(13)-C(8)  | 118.6(2)    |
| C(12)-C(13)-C(17) | 116.6(2)    |
| C(29)-C(28)-P(2)  | 109.29(19)  |
| C(29)-C(28)-C(31) | 107.8(2)    |
| C(29)-C(28)-C(30) | 105.4(2)    |
| C(31)-C(28)-P(2)  | 115.8(2)    |
| C(31)-C(28)-C(30) | 109.2(2)    |
| C(30)-C(28)-P(2)  | 108.75(18)  |

|                     |            |
|---------------------|------------|
| N(1)-C(7)-H(7A)     | 110.6      |
| N(1)-C(7)-H(7B)     | 110.6      |
| N(1)-C(7)-C(6)      | 105.9(2)   |
| H(7A)-C(7)-H(7B)    | 108.7      |
| C(6)-C(7)-H(7A)     | 110.6      |
| C(6)-C(7)-H(7B)     | 110.6      |
| C(8)-C(9)-C(14)     | 123.6(2)   |
| C(10)-C(9)-C(8)     | 118.6(3)   |
| C(10)-C(9)-C(14)    | 117.5(2)   |
| C(6)-C(1)-P(1)      | 112.32(19) |
| C(2)-C(1)-P(1)      | 127.5(2)   |
| C(2)-C(1)-C(6)      | 120.1(2)   |
| C(43)-C(40)-P(3)    | 108.21(17) |
| C(43)-C(40)-C(41)   | 109.0(2)   |
| C(43)-C(40)-C(42)   | 105.3(2)   |
| C(41)-C(40)-P(3)    | 117.04(19) |
| C(41)-C(40)-C(42)   | 108.6(2)   |
| C(42)-C(40)-P(3)    | 108.05(18) |
| C(9)-C(10)-H(10)    | 119.0      |
| C(11)-C(10)-C(9)    | 122.0(3)   |
| C(11)-C(10)-H(10)   | 119.0      |
| C(35)-C(32)-P(3)    | 107.73(17) |
| C(33)-C(32)-P(3)    | 116.34(17) |
| C(33)-C(32)-C(35)   | 108.3(2)   |
| C(33)-C(32)-C(34)   | 108.4(2)   |
| C(34)-C(32)-P(3)    | 110.12(19) |
| C(34)-C(32)-C(35)   | 105.5(2)   |
| C(40)-C(43)-H(43A)  | 109.5      |
| C(40)-C(43)-H(43B)  | 109.5      |
| C(40)-C(43)-H(43C)  | 109.5      |
| H(43A)-C(43)-H(43B) | 109.5      |
| H(43A)-C(43)-H(43C) | 109.5      |
| H(43B)-C(43)-H(43C) | 109.5      |
| C(13)-C(17)-H(17)   | 108.4      |
| C(13)-C(17)-C(19)   | 111.7(2)   |
| C(13)-C(17)-C(18)   | 112.1(2)   |

|                     |          |
|---------------------|----------|
| C(19)-C(17)-H(17)   | 108.4    |
| C(18)-C(17)-H(17)   | 108.4    |
| C(18)-C(17)-C(19)   | 107.6(2) |
| C(40)-C(41)-H(41A)  | 109.5    |
| C(40)-C(41)-H(41B)  | 109.5    |
| C(40)-C(41)-H(41C)  | 109.5    |
| H(41A)-C(41)-H(41B) | 109.5    |
| H(41A)-C(41)-H(41C) | 109.5    |
| H(41B)-C(41)-H(41C) | 109.5    |
| C(1)-C(6)-C(7)      | 113.6(2) |
| C(1)-C(6)-C(5)      | 120.6(3) |
| C(5)-C(6)-C(7)      | 125.8(2) |
| C(40)-C(42)-H(42A)  | 109.5    |
| C(40)-C(42)-H(42B)  | 109.5    |
| C(40)-C(42)-H(42C)  | 109.5    |
| H(42A)-C(42)-H(42B) | 109.5    |
| H(42A)-C(42)-H(42C) | 109.5    |
| H(42B)-C(42)-H(42C) | 109.5    |
| C(13)-C(12)-H(12)   | 119.3    |
| C(11)-C(12)-C(13)   | 121.4(3) |
| C(11)-C(12)-H(12)   | 119.3    |
| C(10)-C(11)-C(12)   | 119.0(3) |
| C(10)-C(11)-H(11)   | 120.5    |
| C(12)-C(11)-H(11)   | 120.5    |
| C(1)-C(2)-H(2)      | 120.2    |
| C(3)-C(2)-C(1)      | 119.6(3) |
| C(3)-C(2)-H(2)      | 120.2    |
| C(32)-C(35)-H(35A)  | 109.5    |
| C(32)-C(35)-H(35B)  | 109.5    |
| C(32)-C(35)-H(35C)  | 109.5    |
| H(35A)-C(35)-H(35B) | 109.5    |
| H(35A)-C(35)-H(35C) | 109.5    |
| H(35B)-C(35)-H(35C) | 109.5    |
| C(3)-C(4)-H(4)      | 119.5    |
| C(5)-C(4)-H(4)      | 119.5    |
| C(5)-C(4)-C(3)      | 121.0(2) |

|                     |            |
|---------------------|------------|
| C(38)-C(36)-P(3)    | 116.0(2)   |
| C(38)-C(36)-C(39)   | 107.3(2)   |
| C(39)-C(36)-P(3)    | 109.68(19) |
| C(37)-C(36)-P(3)    | 107.95(18) |
| C(37)-C(36)-C(38)   | 109.3(2)   |
| C(37)-C(36)-C(39)   | 106.3(2)   |
| C(21)-C(20)-P(2)    | 108.5(2)   |
| C(21)-C(20)-C(23)   | 108.3(2)   |
| C(23)-C(20)-P(2)    | 116.8(2)   |
| C(22)-C(20)-P(2)    | 110.0(2)   |
| C(22)-C(20)-C(21)   | 104.9(3)   |
| C(22)-C(20)-C(23)   | 107.8(2)   |
| C(2)-C(3)-C(4)      | 120.1(3)   |
| C(2)-C(3)-H(3)      | 120.0      |
| C(4)-C(3)-H(3)      | 120.0      |
| C(32)-C(33)-H(33A)  | 109.5      |
| C(32)-C(33)-H(33B)  | 109.5      |
| C(32)-C(33)-H(33C)  | 109.5      |
| H(33A)-C(33)-H(33B) | 109.5      |
| H(33A)-C(33)-H(33C) | 109.5      |
| H(33B)-C(33)-H(33C) | 109.5      |
| C(36)-C(38)-H(38A)  | 109.5      |
| C(36)-C(38)-H(38B)  | 109.5      |
| C(36)-C(38)-H(38C)  | 109.5      |
| H(38A)-C(38)-H(38B) | 109.5      |
| H(38A)-C(38)-H(38C) | 109.5      |
| H(38B)-C(38)-H(38C) | 109.5      |
| C(20)-C(21)-H(21A)  | 109.5      |
| C(20)-C(21)-H(21B)  | 109.5      |
| C(20)-C(21)-H(21C)  | 109.5      |
| H(21A)-C(21)-H(21B) | 109.5      |
| H(21A)-C(21)-H(21C) | 109.5      |
| H(21B)-C(21)-H(21C) | 109.5      |
| C(25)-C(24)-P(2)    | 107.69(19) |
| C(26)-C(24)-P(2)    | 117.1(2)   |
| C(26)-C(24)-C(25)   | 108.5(3)   |

|                     |          |
|---------------------|----------|
| C(27)-C(24)-P(2)    | 109.1(2) |
| C(27)-C(24)-C(25)   | 105.7(2) |
| C(27)-C(24)-C(26)   | 108.2(3) |
| C(17)-C(19)-H(19A)  | 109.5    |
| C(17)-C(19)-H(19B)  | 109.5    |
| C(17)-C(19)-H(19C)  | 109.5    |
| H(19A)-C(19)-H(19B) | 109.5    |
| H(19A)-C(19)-H(19C) | 109.5    |
| H(19B)-C(19)-H(19C) | 109.5    |
| C(9)-C(14)-H(14)    | 108.1    |
| C(9)-C(14)-C(15)    | 113.0(2) |
| C(9)-C(14)-C(16)    | 108.7(2) |
| C(15)-C(14)-H(14)   | 108.1    |
| C(15)-C(14)-C(16)   | 110.7(2) |
| C(16)-C(14)-H(14)   | 108.1    |
| C(28)-C(29)-H(29A)  | 109.5    |
| C(28)-C(29)-H(29B)  | 109.5    |
| C(28)-C(29)-H(29C)  | 109.5    |
| H(29A)-C(29)-H(29B) | 109.5    |
| H(29A)-C(29)-H(29C) | 109.5    |
| H(29B)-C(29)-H(29C) | 109.5    |
| C(36)-C(39)-H(39A)  | 109.5    |
| C(36)-C(39)-H(39B)  | 109.5    |
| C(36)-C(39)-H(39C)  | 109.5    |
| H(39A)-C(39)-H(39B) | 109.5    |
| H(39A)-C(39)-H(39C) | 109.5    |
| H(39B)-C(39)-H(39C) | 109.5    |
| C(36)-C(37)-H(37A)  | 109.5    |
| C(36)-C(37)-H(37B)  | 109.5    |
| C(36)-C(37)-H(37C)  | 109.5    |
| H(37A)-C(37)-H(37B) | 109.5    |
| H(37A)-C(37)-H(37C) | 109.5    |
| H(37B)-C(37)-H(37C) | 109.5    |
| C(6)-C(5)-H(5)      | 120.7    |
| C(4)-C(5)-C(6)      | 118.6(3) |
| C(4)-C(5)-H(5)      | 120.7    |

|                     |       |
|---------------------|-------|
| C(28)-C(31)-H(31A)  | 109.5 |
| C(28)-C(31)-H(31B)  | 109.5 |
| C(28)-C(31)-H(31C)  | 109.5 |
| H(31A)-C(31)-H(31B) | 109.5 |
| H(31A)-C(31)-H(31C) | 109.5 |
| H(31B)-C(31)-H(31C) | 109.5 |
| C(14)-C(15)-H(15A)  | 109.5 |
| C(14)-C(15)-H(15B)  | 109.5 |
| C(14)-C(15)-H(15C)  | 109.5 |
| H(15A)-C(15)-H(15B) | 109.5 |
| H(15A)-C(15)-H(15C) | 109.5 |
| H(15B)-C(15)-H(15C) | 109.5 |
| C(32)-C(34)-H(34A)  | 109.5 |
| C(32)-C(34)-H(34B)  | 109.5 |
| C(32)-C(34)-H(34C)  | 109.5 |
| H(34A)-C(34)-H(34B) | 109.5 |
| H(34A)-C(34)-H(34C) | 109.5 |
| H(34B)-C(34)-H(34C) | 109.5 |
| C(28)-C(30)-H(30A)  | 109.5 |
| C(28)-C(30)-H(30B)  | 109.5 |
| C(28)-C(30)-H(30C)  | 109.5 |
| H(30A)-C(30)-H(30B) | 109.5 |
| H(30A)-C(30)-H(30C) | 109.5 |
| H(30B)-C(30)-H(30C) | 109.5 |
| C(17)-C(18)-H(18A)  | 109.5 |
| C(17)-C(18)-H(18B)  | 109.5 |
| C(17)-C(18)-H(18C)  | 109.5 |
| H(18A)-C(18)-H(18B) | 109.5 |
| H(18A)-C(18)-H(18C) | 109.5 |
| H(18B)-C(18)-H(18C) | 109.5 |
| C(24)-C(25)-H(25A)  | 109.5 |
| C(24)-C(25)-H(25B)  | 109.5 |
| C(24)-C(25)-H(25C)  | 109.5 |
| H(25A)-C(25)-H(25B) | 109.5 |
| H(25A)-C(25)-H(25C) | 109.5 |
| H(25B)-C(25)-H(25C) | 109.5 |

|                     |       |
|---------------------|-------|
| C(14)-C(16)-H(16A)  | 109.5 |
| C(14)-C(16)-H(16B)  | 109.5 |
| C(14)-C(16)-H(16C)  | 109.5 |
| H(16A)-C(16)-H(16B) | 109.5 |
| H(16A)-C(16)-H(16C) | 109.5 |
| H(16B)-C(16)-H(16C) | 109.5 |
| C(20)-C(23)-H(23A)  | 109.5 |
| C(20)-C(23)-H(23B)  | 109.5 |
| C(20)-C(23)-H(23C)  | 109.5 |
| H(23A)-C(23)-H(23B) | 109.5 |
| H(23A)-C(23)-H(23C) | 109.5 |
| H(23B)-C(23)-H(23C) | 109.5 |
| C(24)-C(26)-H(26A)  | 109.5 |
| C(24)-C(26)-H(26B)  | 109.5 |
| C(24)-C(26)-H(26C)  | 109.5 |
| H(26A)-C(26)-H(26B) | 109.5 |
| H(26A)-C(26)-H(26C) | 109.5 |
| H(26B)-C(26)-H(26C) | 109.5 |
| C(24)-C(27)-H(27A)  | 109.5 |
| C(24)-C(27)-H(27B)  | 109.5 |
| C(24)-C(27)-H(27C)  | 109.5 |
| H(27A)-C(27)-H(27B) | 109.5 |
| H(27A)-C(27)-H(27C) | 109.5 |
| H(27B)-C(27)-H(27C) | 109.5 |
| C(20)-C(22)-H(22A)  | 109.5 |
| C(20)-C(22)-H(22B)  | 109.5 |
| C(20)-C(22)-H(22C)  | 109.5 |
| H(22A)-C(22)-H(22B) | 109.5 |
| H(22A)-C(22)-H(22C) | 109.5 |
| H(22B)-C(22)-H(22C) | 109.5 |

---

Symmetry transformations used to generate equivalent atoms:



Table 4. Anisotropic displacement parameters ( $\text{\AA}^2 \times 10^3$ ) for cain94\_0m\_a. The anisotropic displacement factor exponent takes the form:  $-2\pi^2 [ h^2 a^{*2} U^{11} + \dots + 2 h k a^* b^* U^{12} ]$

|       | $U^{11}$ | $U^{22}$ | $U^{33}$ | $U^{23}$ | $U^{13}$ | $U^{12}$ |
|-------|----------|----------|----------|----------|----------|----------|
| I(1)  | 17(1)    | 11(1)    | 14(1)    | 3(1)     | 7(1)     | 2(1)     |
| Pd(1) | 11(1)    | 9(1)     | 11(1)    | 0(1)     | 5(1)     | 0(1)     |
| Pd(2) | 9(1)     | 8(1)     | 10(1)    | 1(1)     | 4(1)     | 1(1)     |
| P(1)  | 10(1)    | 10(1)    | 10(1)    | 0(1)     | 3(1)     | 1(1)     |
| P(3)  | 10(1)    | 12(1)    | 11(1)    | 1(1)     | 4(1)     | 0(1)     |
| P(2)  | 14(1)    | 11(1)    | 15(1)    | -2(1)    | 7(1)     | 0(1)     |
| N(1)  | 14(1)    | 9(1)     | 12(1)    | 1(1)     | 2(1)     | 0(1)     |
| C(8)  | 14(1)    | 9(1)     | 13(1)    | 2(1)     | -2(1)    | 3(1)     |
| C(13) | 13(1)    | 13(1)    | 14(1)    | 3(1)     | 0(1)     | 4(1)     |
| C(28) | 19(1)    | 12(1)    | 23(2)    | -1(1)    | 8(1)     | 2(1)     |
| C(7)  | 21(1)    | 10(1)    | 15(1)    | 3(1)     | 4(1)     | 2(1)     |
| C(9)  | 13(1)    | 12(1)    | 15(1)    | 0(1)     | 1(1)     | 2(1)     |
| C(1)  | 13(1)    | 10(1)    | 15(1)    | 0(1)     | 9(1)     | 1(1)     |
| C(40) | 16(1)    | 11(1)    | 20(2)    | -2(1)    | 9(1)     | 1(1)     |
| C(10) | 13(1)    | 17(1)    | 21(2)    | -1(1)    | 1(1)     | 0(1)     |
| C(32) | 13(1)    | 15(1)    | 14(1)    | 1(1)     | 6(1)     | -1(1)    |
| C(43) | 19(1)    | 24(1)    | 16(2)    | -7(1)    | 7(1)     | -2(1)    |
| C(17) | 16(1)    | 20(1)    | 15(1)    | 2(1)     | 5(1)     | 0(1)     |
| C(41) | 24(1)    | 17(1)    | 25(2)    | -4(1)    | 13(1)    | 4(1)     |
| C(6)  | 16(1)    | 12(1)    | 16(1)    | -1(1)    | 8(1)     | -1(1)    |
| C(42) | 20(1)    | 14(1)    | 26(2)    | -3(1)    | 10(1)    | -2(1)    |
| C(12) | 18(1)    | 16(1)    | 15(1)    | 1(1)     | 2(1)     | 7(1)     |
| C(11) | 14(1)    | 16(1)    | 19(2)    | -3(1)    | -1(1)    | 1(1)     |
| C(2)  | 13(1)    | 16(1)    | 17(1)    | -1(1)    | 5(1)     | 0(1)     |
| C(35) | 18(1)    | 18(1)    | 20(2)    | 5(1)     | 9(1)     | 2(1)     |
| C(4)  | 27(2)    | 12(1)    | 28(2)    | -3(1)    | 15(1)    | -6(1)    |
| C(36) | 15(1)    | 20(1)    | 16(2)    | 5(1)     | 1(1)     | 1(1)     |
| C(20) | 23(1)    | 25(1)    | 13(1)    | -4(1)    | 6(1)     | 1(1)     |
| C(3)  | 16(1)    | 18(1)    | 27(2)    | -8(1)    | 7(1)     | -8(1)    |
| C(33) | 18(1)    | 20(1)    | 22(2)    | 3(1)     | 11(1)    | 1(1)     |
| C(38) | 12(1)    | 32(2)    | 21(2)    | 10(1)    | 1(1)     | 1(1)     |

|       |       |       |       |        |       |       |
|-------|-------|-------|-------|--------|-------|-------|
| C(21) | 16(1) | 36(2) | 21(2) | -7(1)  | 1(1)  | 2(1)  |
| C(24) | 24(2) | 16(1) | 34(2) | -5(1)  | 20(1) | -3(1) |
| C(19) | 24(2) | 26(1) | 17(2) | 9(1)   | 6(1)  | -1(1) |
| C(14) | 12(1) | 14(1) | 19(2) | -1(1)  | 4(1)  | 0(1)  |
| C(29) | 26(2) | 15(1) | 28(2) | -3(1)  | 15(1) | -5(1) |
| C(39) | 17(1) | 26(1) | 19(2) | 12(1)  | 5(1)  | 3(1)  |
| C(37) | 24(2) | 31(2) | 11(2) | -1(1)  | 2(1)  | -1(1) |
| C(5)  | 26(2) | 9(1)  | 25(2) | 3(1)   | 11(1) | 2(1)  |
| C(31) | 22(1) | 16(1) | 36(2) | -7(1)  | 14(1) | 1(1)  |
| C(15) | 29(2) | 15(1) | 23(2) | -1(1)  | 10(1) | -1(1) |
| C(34) | 24(2) | 15(1) | 24(2) | 2(1)   | 7(1)  | -5(1) |
| C(30) | 25(2) | 18(1) | 24(2) | -1(1)  | 4(1)  | 6(1)  |
| C(18) | 18(1) | 31(2) | 16(2) | -2(1)  | 7(1)  | 0(1)  |
| C(25) | 32(2) | 19(1) | 40(2) | -2(1)  | 23(2) | -6(1) |
| C(16) | 15(1) | 23(1) | 27(2) | 0(1)   | 5(1)  | 4(1)  |
| C(23) | 30(2) | 29(2) | 19(2) | -10(1) | 9(1)  | -3(1) |
| C(26) | 39(2) | 26(2) | 42(2) | -6(1)  | 33(2) | -4(1) |
| C(27) | 20(2) | 22(1) | 54(2) | -10(2) | 14(2) | -6(1) |
| C(22) | 39(2) | 30(2) | 18(2) | 2(1)   | 7(1)  | 7(1)  |

---

Table 5. Hydrogen coordinates ( $\times 10^4$ ) and isotropic displacement parameters ( $\text{\AA}^2 \times 10^{-3}$ ) for cain94\_0m\_a.

|        | x     | y    | z     | U(eq) |
|--------|-------|------|-------|-------|
| H(7A)  | 5346  | 7423 | 5853  | 19    |
| H(7B)  | 6073  | 7373 | 5192  | 19    |
| H(10)  | 3610  | 5408 | 4866  | 22    |
| H(43A) | 7978  | 5234 | 5582  | 29    |
| H(43B) | 8361  | 4674 | 5175  | 29    |
| H(43C) | 9009  | 5254 | 5285  | 29    |
| H(17)  | 7132  | 6712 | 4820  | 20    |
| H(41A) | 10612 | 4772 | 6277  | 31    |
| H(41B) | 9964  | 4193 | 6047  | 31    |
| H(41C) | 10524 | 4362 | 7093  | 31    |
| H(42A) | 8868  | 4258 | 7452  | 29    |
| H(42B) | 8286  | 4106 | 6403  | 29    |
| H(42C) | 7887  | 4621 | 6903  | 29    |
| H(12)  | 5364  | 5821 | 3240  | 20    |
| H(11)  | 4018  | 5292 | 3497  | 21    |
| H(2)   | 8626  | 7168 | 8387  | 18    |
| H(35A) | 8793  | 6109 | 5450  | 27    |
| H(35B) | 9226  | 6733 | 5782  | 27    |
| H(35C) | 8447  | 6429 | 6242  | 27    |
| H(4)   | 8090  | 8757 | 7294  | 25    |
| H(3)   | 9037  | 8141 | 8434  | 24    |
| H(33A) | 11307 | 5731 | 6695  | 28    |
| H(33B) | 10996 | 6266 | 6015  | 28    |
| H(33C) | 10437 | 5664 | 5734  | 28    |
| H(38A) | 11581 | 5000 | 7928  | 34    |
| H(38B) | 11990 | 5208 | 8974  | 34    |
| H(38C) | 11711 | 5668 | 8159  | 34    |
| H(21A) | 7961  | 6533 | 9710  | 38    |
| H(21B) | 8450  | 6816 | 10700 | 38    |
| H(21C) | 7852  | 7206 | 9847  | 38    |

|        |       |      |       |    |
|--------|-------|------|-------|----|
| H(19A) | 5794  | 6879 | 2985  | 33 |
| H(19B) | 6834  | 7227 | 3409  | 33 |
| H(19C) | 5892  | 7312 | 3822  | 33 |
| H(14)  | 4831  | 6311 | 6752  | 18 |
| H(29A) | 6701  | 7879 | 9528  | 32 |
| H(29B) | 6132  | 8153 | 8548  | 32 |
| H(29C) | 6775  | 7576 | 8606  | 32 |
| H(39A) | 9468  | 4728 | 8791  | 31 |
| H(39B) | 10630 | 4683 | 9418  | 31 |
| H(39C) | 10307 | 4431 | 8394  | 31 |
| H(37A) | 10524 | 6147 | 8952  | 34 |
| H(37B) | 10823 | 5669 | 9738  | 34 |
| H(37C) | 9647  | 5778 | 9189  | 34 |
| H(5)   | 6729  | 8413 | 6089  | 23 |
| H(31A) | 4145  | 7554 | 9372  | 35 |
| H(31B) | 5184  | 7817 | 10025 | 35 |
| H(31C) | 4572  | 8147 | 9107  | 35 |
| H(15A) | 3636  | 5294 | 6248  | 33 |
| H(15B) | 3744  | 5629 | 7189  | 33 |
| H(15C) | 4727  | 5338 | 7006  | 33 |
| H(34A) | 9868  | 6679 | 7736  | 32 |
| H(34B) | 10506 | 6913 | 7079  | 32 |
| H(34C) | 11000 | 6447 | 7851  | 32 |
| H(30A) | 5156  | 7233 | 7473  | 35 |
| H(30B) | 4604  | 7819 | 7595  | 35 |
| H(30C) | 4115  | 7220 | 7756  | 35 |
| H(18A) | 7502  | 5807 | 4204  | 32 |
| H(18B) | 7919  | 6350 | 3780  | 32 |
| H(18C) | 6895  | 6034 | 3200  | 32 |
| H(25A) | 4843  | 5556 | 8967  | 41 |
| H(25B) | 4174  | 5497 | 9669  | 41 |
| H(25C) | 5386  | 5582 | 10052 | 41 |
| H(16A) | 3508  | 6828 | 5724  | 32 |
| H(16B) | 3066  | 6532 | 6479  | 32 |
| H(16C) | 2823  | 6263 | 5469  | 32 |
| H(23A) | 6765  | 7568 | 10805 | 39 |

|        |      |      |       |    |
|--------|------|------|-------|----|
| H(23B) | 7349 | 7157 | 11634 | 39 |
| H(23C) | 6130 | 7130 | 11236 | 39 |
| H(26A) | 4993 | 6399 | 10968 | 47 |
| H(26B) | 3786 | 6350 | 10490 | 47 |
| H(26C) | 4363 | 6942 | 10460 | 47 |
| H(27A) | 3472 | 6863 | 8753  | 47 |
| H(27B) | 3090 | 6223 | 8835  | 47 |
| H(27C) | 3774 | 6360 | 8166  | 47 |
| H(22A) | 6411 | 6059 | 11082 | 44 |
| H(22B) | 7623 | 6157 | 11407 | 44 |
| H(22C) | 7093 | 5844 | 10451 | 44 |

---

Table 1. Crystal data and structure refinement for cain92\_0m\_a (Compound **7(O)**).

|                                   |                                                                                 |                  |
|-----------------------------------|---------------------------------------------------------------------------------|------------------|
| Identification code               | DZ-75                                                                           |                  |
| Empirical formula                 | C <sub>38</sub> H <sub>46</sub> N <sub>2</sub> O <sub>0.38</sub> P <sub>2</sub> |                  |
| Formula weight                    | 598.87                                                                          |                  |
| Temperature                       | 100.15 K                                                                        |                  |
| Wavelength                        | 1.54178 Å                                                                       |                  |
| Crystal system                    | Triclinic                                                                       |                  |
| Space group                       | P-1                                                                             |                  |
| Unit cell dimensions              | a = 11.6914(5) Å                                                                | α = 95.100(2)°.  |
|                                   | b = 12.0731(5) Å                                                                | β = 94.213(2)°.  |
|                                   | c = 13.1054(6) Å                                                                | γ = 113.203(2)°. |
| Volume                            | 1681.56(13) Å <sup>3</sup>                                                      |                  |
| Z                                 | 2                                                                               |                  |
| Density (calculated)              | 1.183 Mg/m <sup>3</sup>                                                         |                  |
| Absorption coefficient            | 1.388 mm <sup>-1</sup>                                                          |                  |
| F(000)                            | 642                                                                             |                  |
| Crystal size                      | 0.31 x 0.29 x 0.28 mm <sup>3</sup>                                              |                  |
| Theta range for data collection   | 3.410 to 68.328°.                                                               |                  |
| Index ranges                      | -13 ≤ h ≤ 14, -14 ≤ k ≤ 14, -15 ≤ l ≤ 15                                        |                  |
| Reflections collected             | 15973                                                                           |                  |
| Independent reflections           | 6003 [R(int) = 0.0366]                                                          |                  |
| Completeness to theta = 67.679°   | 97.5 %                                                                          |                  |
| Absorption correction             | Semi-empirical from equivalents                                                 |                  |
| Max. and min. transmission        | 0.7531 and 0.6619                                                               |                  |
| Refinement method                 | Full-matrix least-squares on F <sup>2</sup>                                     |                  |
| Data / restraints / parameters    | 6003 / 0 / 397                                                                  |                  |
| Goodness-of-fit on F <sup>2</sup> | 1.038                                                                           |                  |
| Final R indices [I > 2σ(I)]       | R1 = 0.0370, wR2 = 0.0948                                                       |                  |
| R indices (all data)              | R1 = 0.0405, wR2 = 0.0976                                                       |                  |
| Extinction coefficient            | n/a                                                                             |                  |
| Largest diff. peak and hole       | 0.433 and -0.278 e.Å <sup>-3</sup>                                              |                  |

Table 2. Atomic coordinates ( $\times 10^4$ ) and equivalent isotropic displacement parameters ( $\text{\AA}^2 \times 10^3$ ) for cain92\_0m\_a.  $U(\text{eq})$  is defined as one third of the trace of the orthogonalized  $U^{ij}$  tensor.

|       | x       | y       | z       | $U(\text{eq})$ |
|-------|---------|---------|---------|----------------|
| P(2)  | 5330(1) | 4447(1) | 7084(1) | 14(1)          |
| P(1)  | 7050(1) | 4647(1) | 8150(1) | 18(1)          |
| N(2)  | 4139(1) | 3509(1) | 7681(1) | 14(1)          |
| N(1)  | 7981(1) | 4261(1) | 7385(1) | 15(1)          |
| C(27) | 3274(1) | 2355(1) | 7154(1) | 14(1)          |
| C(25) | 4248(1) | 5443(1) | 8379(1) | 17(1)          |
| C(28) | 2443(1) | 2296(1) | 6292(1) | 16(1)          |
| C(8)  | 7943(1) | 3055(1) | 7213(1) | 15(1)          |
| C(20) | 5094(1) | 5766(1) | 7649(1) | 16(1)          |
| C(10) | 7350(1) | 1154(1) | 6121(1) | 22(1)          |
| C(21) | 5591(1) | 6951(1) | 7405(1) | 21(1)          |
| C(9)  | 7360(1) | 2320(1) | 6268(1) | 17(1)          |
| C(13) | 8506(1) | 2630(1) | 7987(1) | 17(1)          |
| C(6)  | 9002(1) | 6414(1) | 7563(1) | 16(1)          |
| C(1)  | 8060(1) | 6243(1) | 8201(1) | 16(1)          |
| C(7)  | 9002(1) | 5259(1) | 7030(1) | 17(1)          |
| C(14) | 6766(1) | 2763(1) | 5413(1) | 19(1)          |
| C(32) | 3286(1) | 1290(1) | 7504(1) | 16(1)          |
| C(22) | 5230(2) | 7811(1) | 7894(1) | 25(1)          |
| C(5)  | 9847(2) | 7586(1) | 7468(1) | 22(1)          |
| C(29) | 1695(1) | 1156(1) | 5749(1) | 20(1)          |
| C(26) | 3767(1) | 4117(1) | 8537(1) | 19(1)          |
| C(2)  | 7987(1) | 7240(1) | 8781(1) | 20(1)          |
| C(30) | 1745(1) | 105(1)  | 6054(1) | 22(1)          |
| C(17) | 9197(1) | 3423(1) | 8994(1) | 20(1)          |
| C(4)  | 9759(2) | 8578(1) | 8031(1) | 24(1)          |
| C(12) | 8463(1) | 1455(1) | 7804(1) | 22(1)          |
| C(23) | 4393(2) | 7490(2) | 8622(1) | 27(1)          |
| C(33) | 2332(1) | 3421(1) | 5943(1) | 19(1)          |
| C(35) | 972(1)  | 3309(2) | 5862(1) | 24(1)          |
| C(31) | 2521(1) | 173(1)  | 6931(1) | 19(1)          |

|       |          |         |         |       |
|-------|----------|---------|---------|-------|
| C(19) | 8682(2)  | 2823(2) | 9938(1) | 28(1) |
| C(36) | 4073(1)  | 1323(1) | 8491(1) | 20(1) |
| C(16) | 5406(2)  | 1881(2) | 5056(1) | 27(1) |
| C(11) | 7890(2)  | 722(1)  | 6880(1) | 24(1) |
| C(24) | 3903(2)  | 6310(1) | 8877(1) | 24(1) |
| C(15) | 7537(2)  | 2981(2) | 4496(1) | 25(1) |
| C(3)  | 8842(2)  | 8400(1) | 8691(1) | 23(1) |
| C(37) | 3222(2)  | 647(2)  | 9267(1) | 34(1) |
| C(38) | 5033(2)  | 792(2)  | 8277(1) | 30(1) |
| C(18) | 10604(1) | 3739(2) | 9031(1) | 24(1) |
| C(34) | 2866(2)  | 3689(2) | 4916(1) | 28(1) |
| O(1)  | 6733(2)  | 4146(2) | 8989(2) | 19(1) |

---



Table 3. Bond lengths [Å] and angles [°] for cain92\_0m\_a.

---

|             |            |
|-------------|------------|
| P(2)-P(1)   | 2.2793(5)  |
| P(2)-N(2)   | 1.7053(12) |
| P(2)-C(20)  | 1.8235(14) |
| P(1)-N(1)   | 1.6981(12) |
| P(1)-C(1)   | 1.8124(15) |
| P(1)-O(1)   | 1.310(2)   |
| N(2)-C(27)  | 1.4340(18) |
| N(2)-C(26)  | 1.4702(18) |
| N(1)-C(8)   | 1.4363(18) |
| N(1)-C(7)   | 1.4631(18) |
| C(27)-C(28) | 1.4123(19) |
| C(27)-C(32) | 1.4085(19) |
| C(25)-C(20) | 1.395(2)   |
| C(25)-C(26) | 1.513(2)   |
| C(25)-C(24) | 1.391(2)   |
| C(28)-C(29) | 1.398(2)   |
| C(28)-C(33) | 1.5203(19) |
| C(8)-C(9)   | 1.411(2)   |
| C(8)-C(13)  | 1.410(2)   |
| C(20)-C(21) | 1.393(2)   |
| C(10)-H(10) | 0.9500     |
| C(10)-C(9)  | 1.398(2)   |
| C(10)-C(11) | 1.386(2)   |
| C(21)-H(21) | 0.9500     |
| C(21)-C(22) | 1.390(2)   |
| C(9)-C(14)  | 1.520(2)   |
| C(13)-C(17) | 1.523(2)   |
| C(13)-C(12) | 1.398(2)   |
| C(6)-C(1)   | 1.393(2)   |
| C(6)-C(7)   | 1.5036(19) |
| C(6)-C(5)   | 1.394(2)   |
| C(1)-C(2)   | 1.401(2)   |
| C(7)-H(7A)  | 0.9900     |
| C(7)-H(7B)  | 0.9900     |

|              |            |
|--------------|------------|
| C(14)-H(14)  | 1.0000     |
| C(14)-C(16)  | 1.533(2)   |
| C(14)-C(15)  | 1.535(2)   |
| C(32)-C(31)  | 1.397(2)   |
| C(32)-C(36)  | 1.5185(19) |
| C(22)-H(22)  | 0.9500     |
| C(22)-C(23)  | 1.387(2)   |
| C(5)-H(5)    | 0.9500     |
| C(5)-C(4)    | 1.392(2)   |
| C(29)-H(29)  | 0.9500     |
| C(29)-C(30)  | 1.385(2)   |
| C(26)-H(26A) | 0.9900     |
| C(26)-H(26B) | 0.9900     |
| C(2)-H(2)    | 0.9500     |
| C(2)-C(3)    | 1.386(2)   |
| C(30)-H(30)  | 0.9500     |
| C(30)-C(31)  | 1.387(2)   |
| C(17)-H(17)  | 1.0000     |
| C(17)-C(19)  | 1.531(2)   |
| C(17)-C(18)  | 1.531(2)   |
| C(4)-H(4)    | 0.9500     |
| C(4)-C(3)    | 1.390(2)   |
| C(12)-H(12)  | 0.9500     |
| C(12)-C(11)  | 1.387(2)   |
| C(23)-H(23)  | 0.9500     |
| C(23)-C(24)  | 1.393(2)   |
| C(33)-H(33)  | 1.0000     |
| C(33)-C(35)  | 1.536(2)   |
| C(33)-C(34)  | 1.532(2)   |
| C(35)-H(35A) | 0.9800     |
| C(35)-H(35B) | 0.9800     |
| C(35)-H(35C) | 0.9800     |
| C(31)-H(31)  | 0.9500     |
| C(19)-H(19A) | 0.9800     |
| C(19)-H(19B) | 0.9800     |
| C(19)-H(19C) | 0.9800     |

|                  |            |
|------------------|------------|
| C(36)-H(36)      | 1.0000     |
| C(36)-C(37)      | 1.532(2)   |
| C(36)-C(38)      | 1.527(2)   |
| C(16)-H(16A)     | 0.9800     |
| C(16)-H(16B)     | 0.9800     |
| C(16)-H(16C)     | 0.9800     |
| C(11)-H(11)      | 0.9500     |
| C(24)-H(24)      | 0.9500     |
| C(15)-H(15A)     | 0.9800     |
| C(15)-H(15B)     | 0.9800     |
| C(15)-H(15C)     | 0.9800     |
| C(3)-H(3)        | 0.9500     |
| C(37)-H(37A)     | 0.9800     |
| C(37)-H(37B)     | 0.9800     |
| C(37)-H(37C)     | 0.9800     |
| C(38)-H(38A)     | 0.9800     |
| C(38)-H(38B)     | 0.9800     |
| C(38)-H(38C)     | 0.9800     |
| C(18)-H(18A)     | 0.9800     |
| C(18)-H(18B)     | 0.9800     |
| C(18)-H(18C)     | 0.9800     |
| C(34)-H(34A)     | 0.9800     |
| C(34)-H(34B)     | 0.9800     |
| C(34)-H(34C)     | 0.9800     |
|                  |            |
| N(2)-P(2)-P(1)   | 101.90(4)  |
| N(2)-P(2)-C(20)  | 90.64(6)   |
| C(20)-P(2)-P(1)  | 99.23(5)   |
| N(1)-P(1)-P(2)   | 105.89(4)  |
| N(1)-P(1)-C(1)   | 90.58(6)   |
| C(1)-P(1)-P(2)   | 102.93(5)  |
| O(1)-P(1)-P(2)   | 111.38(12) |
| O(1)-P(1)-N(1)   | 121.29(12) |
| O(1)-P(1)-C(1)   | 121.64(13) |
| C(27)-N(2)-P(2)  | 120.58(9)  |
| C(27)-N(2)-C(26) | 120.15(11) |

|                   |            |
|-------------------|------------|
| C(26)-N(2)-P(2)   | 115.06(9)  |
| C(8)-N(1)-P(1)    | 123.52(9)  |
| C(8)-N(1)-C(7)    | 118.87(11) |
| C(7)-N(1)-P(1)    | 116.84(9)  |
| C(28)-C(27)-N(2)  | 120.30(12) |
| C(32)-C(27)-N(2)  | 118.69(12) |
| C(32)-C(27)-C(28) | 121.01(13) |
| C(20)-C(25)-C(26) | 114.24(12) |
| C(24)-C(25)-C(20) | 120.01(14) |
| C(24)-C(25)-C(26) | 125.74(14) |
| C(27)-C(28)-C(33) | 122.49(13) |
| C(29)-C(28)-C(27) | 118.24(13) |
| C(29)-C(28)-C(33) | 119.28(12) |
| C(9)-C(8)-N(1)    | 119.67(12) |
| C(13)-C(8)-N(1)   | 119.37(12) |
| C(13)-C(8)-C(9)   | 120.95(13) |
| C(25)-C(20)-P(2)  | 110.73(11) |
| C(21)-C(20)-P(2)  | 128.64(11) |
| C(21)-C(20)-C(25) | 120.57(13) |
| C(9)-C(10)-H(10)  | 119.3      |
| C(11)-C(10)-H(10) | 119.3      |
| C(11)-C(10)-C(9)  | 121.33(14) |
| C(20)-C(21)-H(21) | 120.4      |
| C(22)-C(21)-C(20) | 119.30(14) |
| C(22)-C(21)-H(21) | 120.4      |
| C(8)-C(9)-C(14)   | 122.01(12) |
| C(10)-C(9)-C(8)   | 118.25(13) |
| C(10)-C(9)-C(14)  | 119.74(13) |
| C(8)-C(13)-C(17)  | 122.22(13) |
| C(12)-C(13)-C(8)  | 118.54(13) |
| C(12)-C(13)-C(17) | 119.21(13) |
| C(1)-C(6)-C(7)    | 114.47(13) |
| C(1)-C(6)-C(5)    | 119.92(14) |
| C(5)-C(6)-C(7)    | 125.60(13) |
| C(6)-C(1)-P(1)    | 111.37(10) |
| C(6)-C(1)-C(2)    | 120.43(14) |

|                     |            |
|---------------------|------------|
| C(2)-C(1)-P(1)      | 128.20(12) |
| N(1)-C(7)-C(6)      | 106.34(11) |
| N(1)-C(7)-H(7A)     | 110.5      |
| N(1)-C(7)-H(7B)     | 110.5      |
| C(6)-C(7)-H(7A)     | 110.5      |
| C(6)-C(7)-H(7B)     | 110.5      |
| H(7A)-C(7)-H(7B)    | 108.7      |
| C(9)-C(14)-H(14)    | 107.8      |
| C(9)-C(14)-C(16)    | 111.76(13) |
| C(9)-C(14)-C(15)    | 111.07(12) |
| C(16)-C(14)-H(14)   | 107.8      |
| C(16)-C(14)-C(15)   | 110.42(12) |
| C(15)-C(14)-H(14)   | 107.8      |
| C(27)-C(32)-C(36)   | 122.00(13) |
| C(31)-C(32)-C(27)   | 118.26(13) |
| C(31)-C(32)-C(36)   | 119.72(13) |
| C(21)-C(22)-H(22)   | 119.9      |
| C(23)-C(22)-C(21)   | 120.10(15) |
| C(23)-C(22)-H(22)   | 119.9      |
| C(6)-C(5)-H(5)      | 120.2      |
| C(4)-C(5)-C(6)      | 119.57(14) |
| C(4)-C(5)-H(5)      | 120.2      |
| C(28)-C(29)-H(29)   | 119.4      |
| C(30)-C(29)-C(28)   | 121.20(13) |
| C(30)-C(29)-H(29)   | 119.4      |
| N(2)-C(26)-C(25)    | 105.93(11) |
| N(2)-C(26)-H(26A)   | 110.6      |
| N(2)-C(26)-H(26B)   | 110.6      |
| C(25)-C(26)-H(26A)  | 110.6      |
| C(25)-C(26)-H(26B)  | 110.6      |
| H(26A)-C(26)-H(26B) | 108.7      |
| C(1)-C(2)-H(2)      | 120.4      |
| C(3)-C(2)-C(1)      | 119.12(14) |
| C(3)-C(2)-H(2)      | 120.4      |
| C(29)-C(30)-H(30)   | 120.1      |
| C(29)-C(30)-C(31)   | 119.85(14) |

|                     |            |
|---------------------|------------|
| C(31)-C(30)-H(30)   | 120.1      |
| C(13)-C(17)-H(17)   | 107.9      |
| C(13)-C(17)-C(19)   | 112.03(13) |
| C(13)-C(17)-C(18)   | 110.16(12) |
| C(19)-C(17)-H(17)   | 107.9      |
| C(19)-C(17)-C(18)   | 110.84(12) |
| C(18)-C(17)-H(17)   | 107.9      |
| C(5)-C(4)-H(4)      | 119.9      |
| C(3)-C(4)-C(5)      | 120.28(14) |
| C(3)-C(4)-H(4)      | 119.9      |
| C(13)-C(12)-H(12)   | 119.5      |
| C(11)-C(12)-C(13)   | 121.08(14) |
| C(11)-C(12)-H(12)   | 119.5      |
| C(22)-C(23)-H(23)   | 119.6      |
| C(22)-C(23)-C(24)   | 120.90(14) |
| C(24)-C(23)-H(23)   | 119.6      |
| C(28)-C(33)-H(33)   | 107.7      |
| C(28)-C(33)-C(35)   | 111.77(12) |
| C(28)-C(33)-C(34)   | 111.16(12) |
| C(35)-C(33)-H(33)   | 107.7      |
| C(34)-C(33)-H(33)   | 107.7      |
| C(34)-C(33)-C(35)   | 110.50(12) |
| C(33)-C(35)-H(35A)  | 109.5      |
| C(33)-C(35)-H(35B)  | 109.5      |
| C(33)-C(35)-H(35C)  | 109.5      |
| H(35A)-C(35)-H(35B) | 109.5      |
| H(35A)-C(35)-H(35C) | 109.5      |
| H(35B)-C(35)-H(35C) | 109.5      |
| C(32)-C(31)-H(31)   | 119.4      |
| C(30)-C(31)-C(32)   | 121.25(13) |
| C(30)-C(31)-H(31)   | 119.4      |
| C(17)-C(19)-H(19A)  | 109.5      |
| C(17)-C(19)-H(19B)  | 109.5      |
| C(17)-C(19)-H(19C)  | 109.5      |
| H(19A)-C(19)-H(19B) | 109.5      |
| H(19A)-C(19)-H(19C) | 109.5      |

|                     |            |
|---------------------|------------|
| H(19B)-C(19)-H(19C) | 109.5      |
| C(32)-C(36)-H(36)   | 108.1      |
| C(32)-C(36)-C(37)   | 109.99(12) |
| C(32)-C(36)-C(38)   | 111.40(13) |
| C(37)-C(36)-H(36)   | 108.1      |
| C(38)-C(36)-H(36)   | 108.1      |
| C(38)-C(36)-C(37)   | 110.90(13) |
| C(14)-C(16)-H(16A)  | 109.5      |
| C(14)-C(16)-H(16B)  | 109.5      |
| C(14)-C(16)-H(16C)  | 109.5      |
| H(16A)-C(16)-H(16B) | 109.5      |
| H(16A)-C(16)-H(16C) | 109.5      |
| H(16B)-C(16)-H(16C) | 109.5      |
| C(10)-C(11)-C(12)   | 119.84(14) |
| C(10)-C(11)-H(11)   | 120.1      |
| C(12)-C(11)-H(11)   | 120.1      |
| C(25)-C(24)-C(23)   | 119.12(15) |
| C(25)-C(24)-H(24)   | 120.4      |
| C(23)-C(24)-H(24)   | 120.4      |
| C(14)-C(15)-H(15A)  | 109.5      |
| C(14)-C(15)-H(15B)  | 109.5      |
| C(14)-C(15)-H(15C)  | 109.5      |
| H(15A)-C(15)-H(15B) | 109.5      |
| H(15A)-C(15)-H(15C) | 109.5      |
| H(15B)-C(15)-H(15C) | 109.5      |
| C(2)-C(3)-C(4)      | 120.62(14) |
| C(2)-C(3)-H(3)      | 119.7      |
| C(4)-C(3)-H(3)      | 119.7      |
| C(36)-C(37)-H(37A)  | 109.5      |
| C(36)-C(37)-H(37B)  | 109.5      |
| C(36)-C(37)-H(37C)  | 109.5      |
| H(37A)-C(37)-H(37B) | 109.5      |
| H(37A)-C(37)-H(37C) | 109.5      |
| H(37B)-C(37)-H(37C) | 109.5      |
| C(36)-C(38)-H(38A)  | 109.5      |
| C(36)-C(38)-H(38B)  | 109.5      |

|                     |       |
|---------------------|-------|
| C(36)-C(38)-H(38C)  | 109.5 |
| H(38A)-C(38)-H(38B) | 109.5 |
| H(38A)-C(38)-H(38C) | 109.5 |
| H(38B)-C(38)-H(38C) | 109.5 |
| C(17)-C(18)-H(18A)  | 109.5 |
| C(17)-C(18)-H(18B)  | 109.5 |
| C(17)-C(18)-H(18C)  | 109.5 |
| H(18A)-C(18)-H(18B) | 109.5 |
| H(18A)-C(18)-H(18C) | 109.5 |
| H(18B)-C(18)-H(18C) | 109.5 |
| C(33)-C(34)-H(34A)  | 109.5 |
| C(33)-C(34)-H(34B)  | 109.5 |
| C(33)-C(34)-H(34C)  | 109.5 |
| H(34A)-C(34)-H(34B) | 109.5 |
| H(34A)-C(34)-H(34C) | 109.5 |
| H(34B)-C(34)-H(34C) | 109.5 |

---

Symmetry transformations used to generate equivalent atoms:



Table 4. Anisotropic displacement parameters ( $\text{\AA}^2 \times 10^3$ ) for cain92\_0m\_a. The anisotropic displacement factor exponent takes the form:  $-2\pi^2 [ h^2 a^{*2} U^{11} + \dots + 2 h k a^* b^* U^{12} ]$

|       | U <sup>11</sup> | U <sup>22</sup> | U <sup>33</sup> | U <sup>23</sup> | U <sup>13</sup> | U <sup>12</sup> |
|-------|-----------------|-----------------|-----------------|-----------------|-----------------|-----------------|
| P(2)  | 12(1)           | 12(1)           | 20(1)           | 4(1)            | 4(1)            | 5(1)            |
| P(1)  | 11(1)           | 16(1)           | 26(1)           | -4(1)           | 1(1)            | 5(1)            |
| N(2)  | 12(1)           | 13(1)           | 17(1)           | 1(1)            | 2(1)            | 4(1)            |
| N(1)  | 12(1)           | 14(1)           | 19(1)           | 2(1)            | 2(1)            | 6(1)            |
| C(27) | 11(1)           | 14(1)           | 16(1)           | 2(1)            | 4(1)            | 4(1)            |
| C(25) | 14(1)           | 16(1)           | 20(1)           | 0(1)            | -1(1)           | 5(1)            |
| C(28) | 14(1)           | 18(1)           | 16(1)           | 3(1)            | 4(1)            | 5(1)            |
| C(8)  | 12(1)           | 15(1)           | 19(1)           | 3(1)            | 4(1)            | 6(1)            |
| C(20) | 11(1)           | 15(1)           | 21(1)           | 1(1)            | -2(1)           | 6(1)            |
| C(10) | 21(1)           | 18(1)           | 24(1)           | -1(1)           | 3(1)            | 6(1)            |
| C(21) | 18(1)           | 17(1)           | 28(1)           | 6(1)            | 3(1)            | 8(1)            |
| C(9)  | 13(1)           | 17(1)           | 19(1)           | 1(1)            | 3(1)            | 4(1)            |
| C(13) | 12(1)           | 19(1)           | 21(1)           | 4(1)            | 3(1)            | 6(1)            |
| C(6)  | 17(1)           | 17(1)           | 16(1)           | 3(1)            | -2(1)           | 8(1)            |
| C(1)  | 13(1)           | 17(1)           | 18(1)           | 0(1)            | -4(1)           | 6(1)            |
| C(7)  | 19(1)           | 16(1)           | 18(1)           | 5(1)            | 5(1)            | 7(1)            |
| C(14) | 20(1)           | 18(1)           | 19(1)           | -1(1)           | 0(1)            | 8(1)            |
| C(32) | 14(1)           | 16(1)           | 18(1)           | 4(1)            | 5(1)            | 6(1)            |
| C(22) | 25(1)           | 15(1)           | 38(1)           | 4(1)            | 1(1)            | 9(1)            |
| C(5)  | 22(1)           | 20(1)           | 23(1)           | 5(1)            | 4(1)            | 7(1)            |
| C(29) | 17(1)           | 22(1)           | 17(1)           | 1(1)            | -1(1)           | 5(1)            |
| C(26) | 18(1)           | 17(1)           | 19(1)           | 1(1)            | 5(1)            | 6(1)            |
| C(2)  | 16(1)           | 21(1)           | 23(1)           | -3(1)           | 0(1)            | 7(1)            |
| C(30) | 21(1)           | 16(1)           | 22(1)           | -3(1)           | 2(1)            | 2(1)            |
| C(17) | 19(1)           | 23(1)           | 20(1)           | 2(1)            | 0(1)            | 11(1)           |
| C(4)  | 24(1)           | 16(1)           | 29(1)           | 3(1)            | 1(1)            | 4(1)            |
| C(12) | 22(1)           | 21(1)           | 27(1)           | 7(1)            | 4(1)            | 12(1)           |
| C(23) | 26(1)           | 19(1)           | 38(1)           | -4(1)           | 4(1)            | 12(1)           |
| C(33) | 17(1)           | 19(1)           | 20(1)           | 4(1)            | -1(1)           | 7(1)            |
| C(35) | 20(1)           | 26(1)           | 28(1)           | 5(1)            | 1(1)            | 12(1)           |
| C(31) | 21(1)           | 13(1)           | 23(1)           | 3(1)            | 5(1)            | 6(1)            |

|       |       |       |       |       |       |       |
|-------|-------|-------|-------|-------|-------|-------|
| C(19) | 25(1) | 36(1) | 24(1) | 5(1)  | 4(1)  | 13(1) |
| C(36) | 19(1) | 16(1) | 22(1) | 4(1)  | -1(1) | 7(1)  |
| C(16) | 22(1) | 31(1) | 26(1) | 1(1)  | -4(1) | 8(1)  |
| C(11) | 26(1) | 16(1) | 33(1) | 3(1)  | 6(1)  | 10(1) |
| C(24) | 21(1) | 22(1) | 28(1) | -2(1) | 6(1)  | 8(1)  |
| C(15) | 30(1) | 25(1) | 21(1) | 3(1)  | 3(1)  | 11(1) |
| C(3)  | 23(1) | 16(1) | 27(1) | -4(1) | -3(1) | 8(1)  |
| C(37) | 29(1) | 46(1) | 22(1) | 12(1) | 2(1)  | 8(1)  |
| C(38) | 26(1) | 29(1) | 41(1) | 10(1) | 0(1)  | 16(1) |
| C(18) | 19(1) | 30(1) | 24(1) | 3(1)  | -2(1) | 10(1) |
| C(34) | 27(1) | 33(1) | 28(1) | 15(1) | 6(1)  | 14(1) |
| O(1)  | 21(2) | 22(2) | 15(1) | 9(1)  | 7(1)  | 7(1)  |

---

Table 5. Hydrogen coordinates ( $\times 10^4$ ) and isotropic displacement parameters ( $\text{\AA}^2 \times 10^{-3}$ ) for cain92\_0m\_a.

|        | x     | y    | z     | U(eq) |
|--------|-------|------|-------|-------|
| H(10)  | 6965  | 648  | 5487  | 26    |
| H(21)  | 6170  | 7169 | 6911  | 25    |
| H(7A)  | 8863  | 5230 | 6272  | 21    |
| H(7B)  | 9814  | 5205 | 7212  | 21    |
| H(14)  | 6761  | 3558 | 5696  | 23    |
| H(22)  | 5558  | 8620 | 7728  | 30    |
| H(5)   | 10480 | 7708 | 7023  | 26    |
| H(29)  | 1142  | 1100 | 5159  | 24    |
| H(26A) | 4143  | 4023 | 9208  | 23    |
| H(26B) | 2844  | 3767 | 8523  | 23    |
| H(2)   | 7359  | 7121 | 9231  | 24    |
| H(30)  | 1248  | -660 | 5664  | 26    |
| H(17)  | 9075  | 4199 | 9012  | 24    |
| H(4)   | 10328 | 9379 | 7964  | 29    |
| H(12)  | 8833  | 1154 | 8321  | 27    |
| H(23)  | 4150  | 8083 | 8950  | 33    |
| H(33)  | 2842  | 4127 | 6474  | 23    |
| H(35A) | 469   | 2679 | 5295  | 36    |
| H(35B) | 953   | 4088 | 5730  | 36    |
| H(35C) | 628   | 3088 | 6510  | 36    |
| H(31)  | 2534  | -554 | 7147  | 23    |
| H(19A) | 7775  | 2593 | 9882  | 42    |
| H(19B) | 9085  | 3396 | 10565 | 42    |
| H(19C) | 8856  | 2096 | 9971  | 42    |
| H(36)  | 4537  | 2192 | 8798  | 24    |
| H(16A) | 5390  | 1114 | 4724  | 41    |
| H(16B) | 5025  | 2238 | 4564  | 41    |
| H(16C) | 4934  | 1727 | 5654  | 41    |
| H(11)  | 7867  | -75  | 6767  | 29    |
| H(24)  | 3341  | 6100 | 9386  | 29    |

|        |       |      |      |    |
|--------|-------|------|------|----|
| H(15A) | 8399  | 3560 | 4733 | 38 |
| H(15B) | 7163  | 3311 | 3974 | 38 |
| H(15C) | 7543  | 2210 | 4196 | 38 |
| H(3)   | 8802  | 9081 | 9084 | 27 |
| H(37A) | 2599  | 987  | 9377 | 51 |
| H(37B) | 3730  | 738  | 9924 | 51 |
| H(37C) | 2794  | -217 | 8998 | 51 |
| H(38A) | 4599  | -48  | 7943 | 45 |
| H(38B) | 5510  | 806  | 8928 | 45 |
| H(38C) | 5607  | 1277 | 7821 | 45 |
| H(18A) | 10750 | 2992 | 9017 | 37 |
| H(18B) | 11044 | 4280 | 9666 | 37 |
| H(18C) | 10920 | 4146 | 8433 | 37 |
| H(34A) | 3731  | 3751 | 4979 | 42 |
| H(34B) | 2854  | 4457 | 4741 | 42 |
| H(34C) | 2356  | 3030 | 4372 | 42 |

---
